# Supplementary material for: Unprecedented organelle genomic variations in morning glories reveal independent evolutionary scenarios of parasitic plants and the diversification of plant mitochondrial complexes
Source: PubMed Central journal article supplement (PMC8851834; doi:10.1186/s12915-022-01250-1), 2022-02-16
Supplement: 12915_2022_1250_MOESM3_ESM.pdf [file 12915_2022_1250_MOESM3_ESM.pdf]

atp1

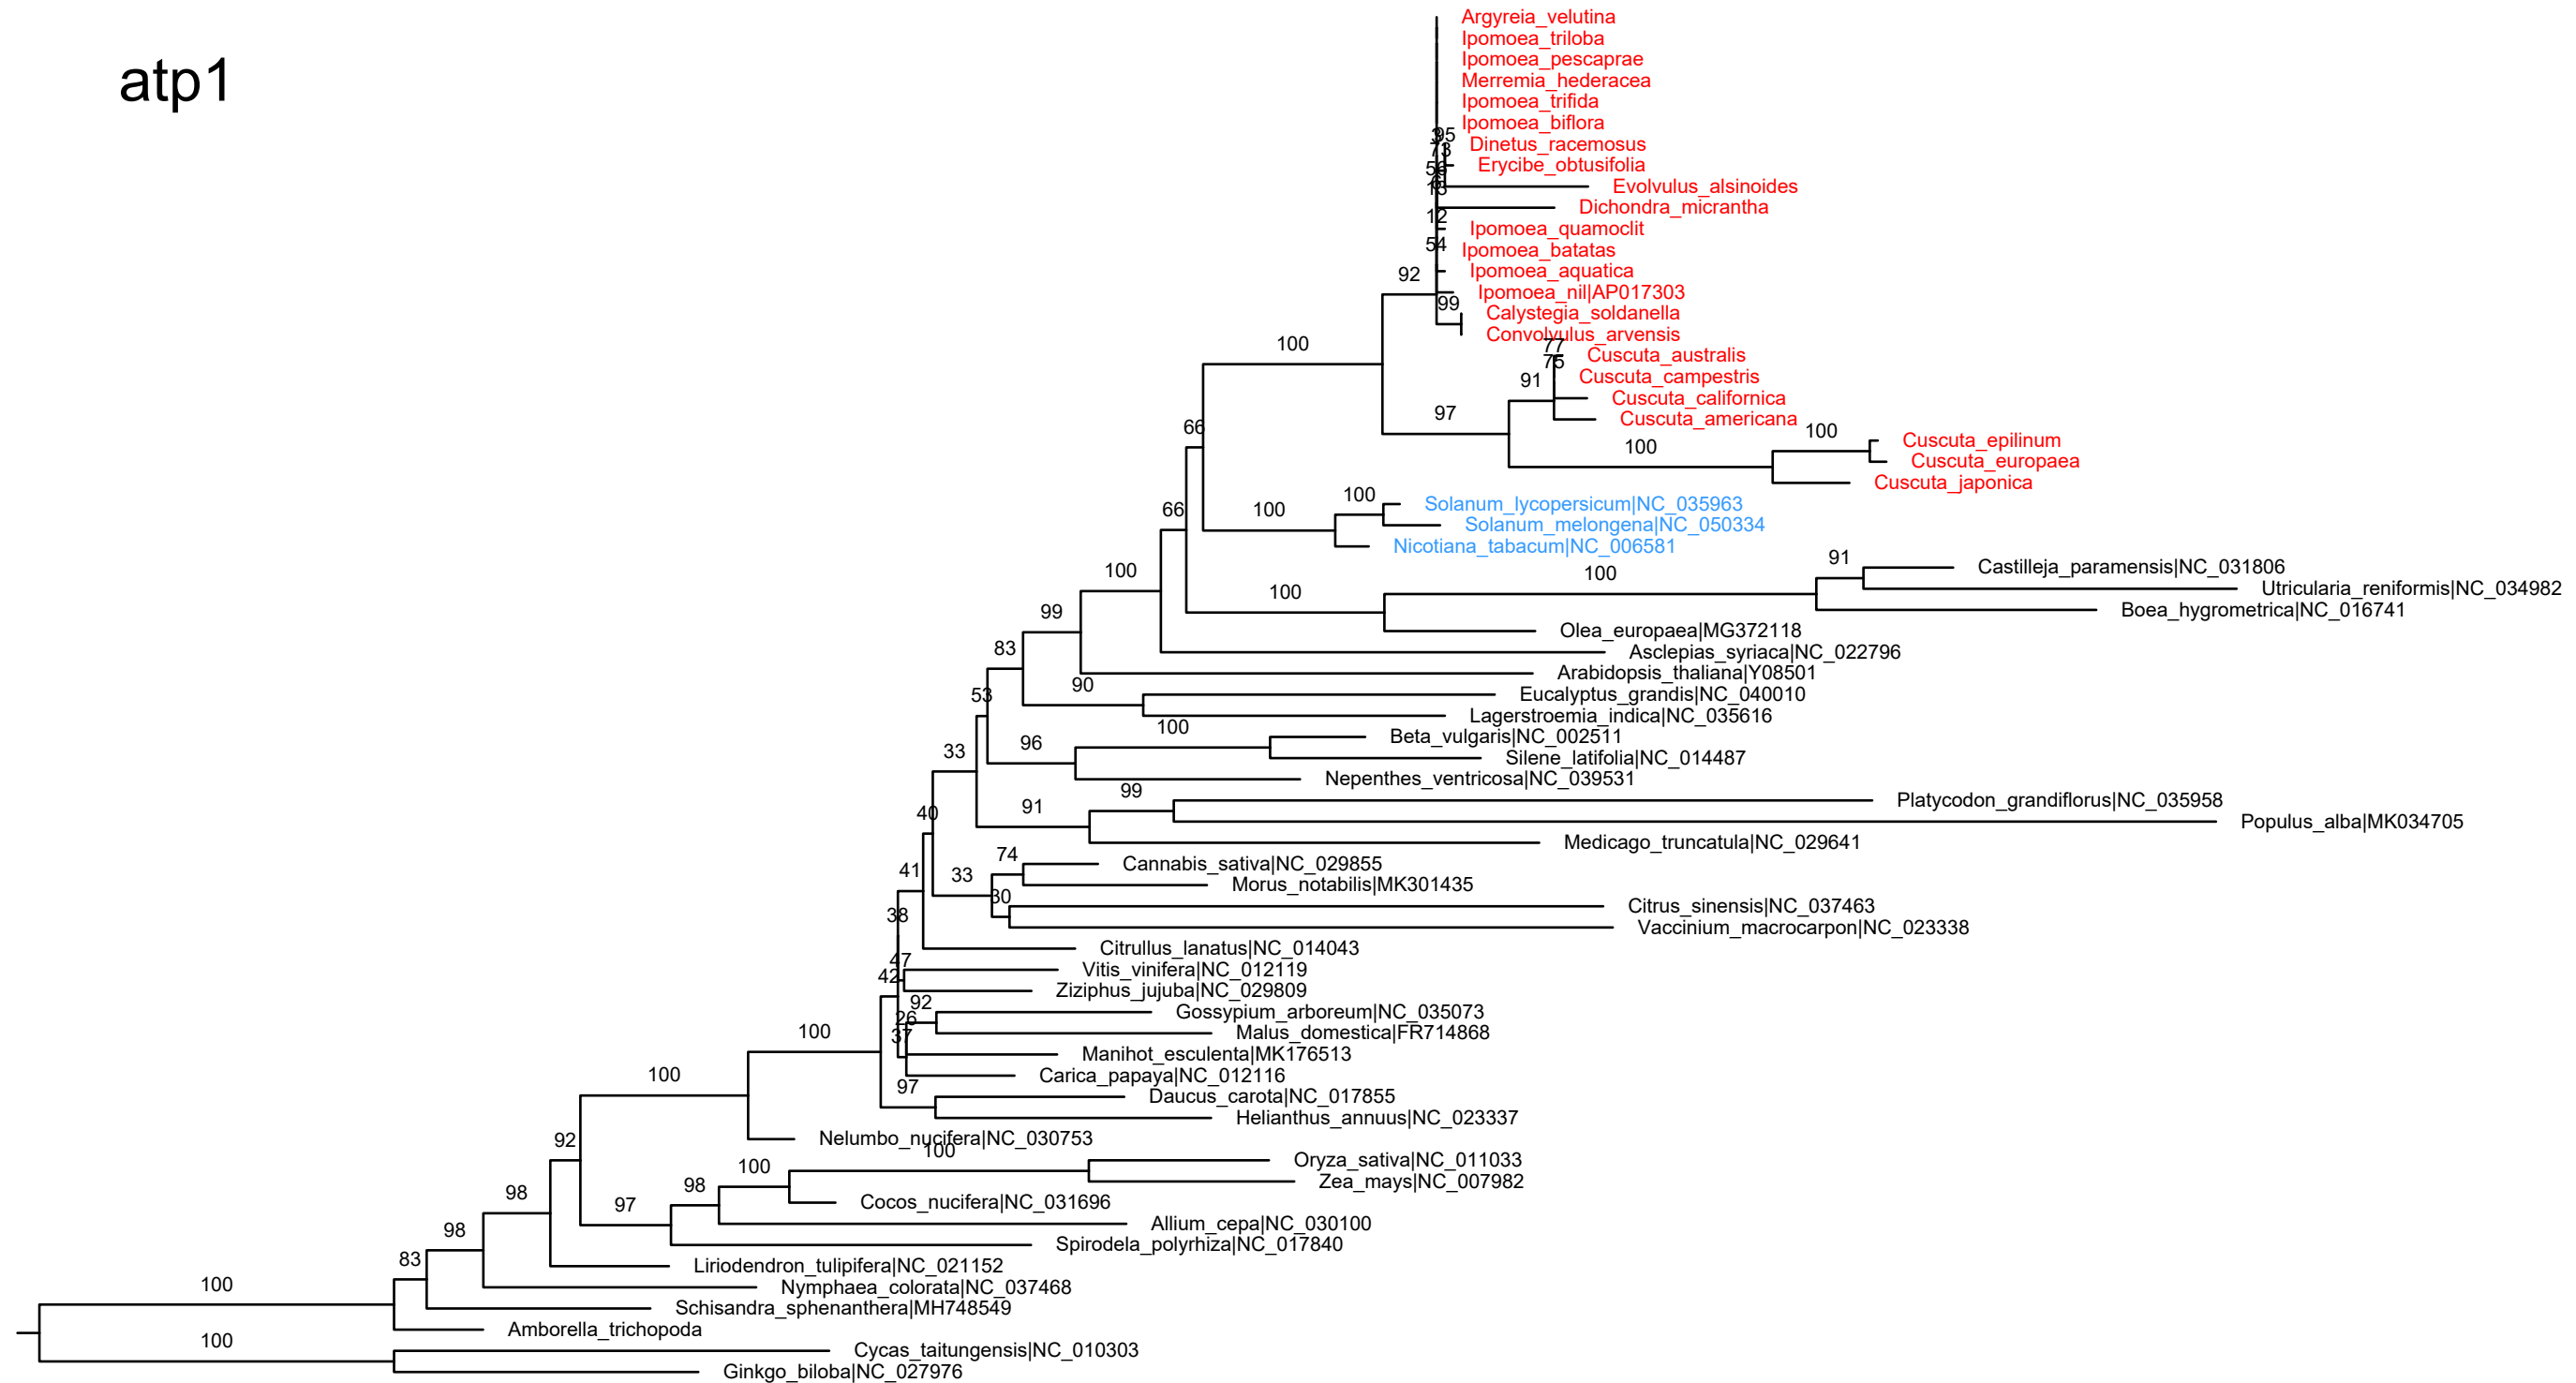

0.03

atp4

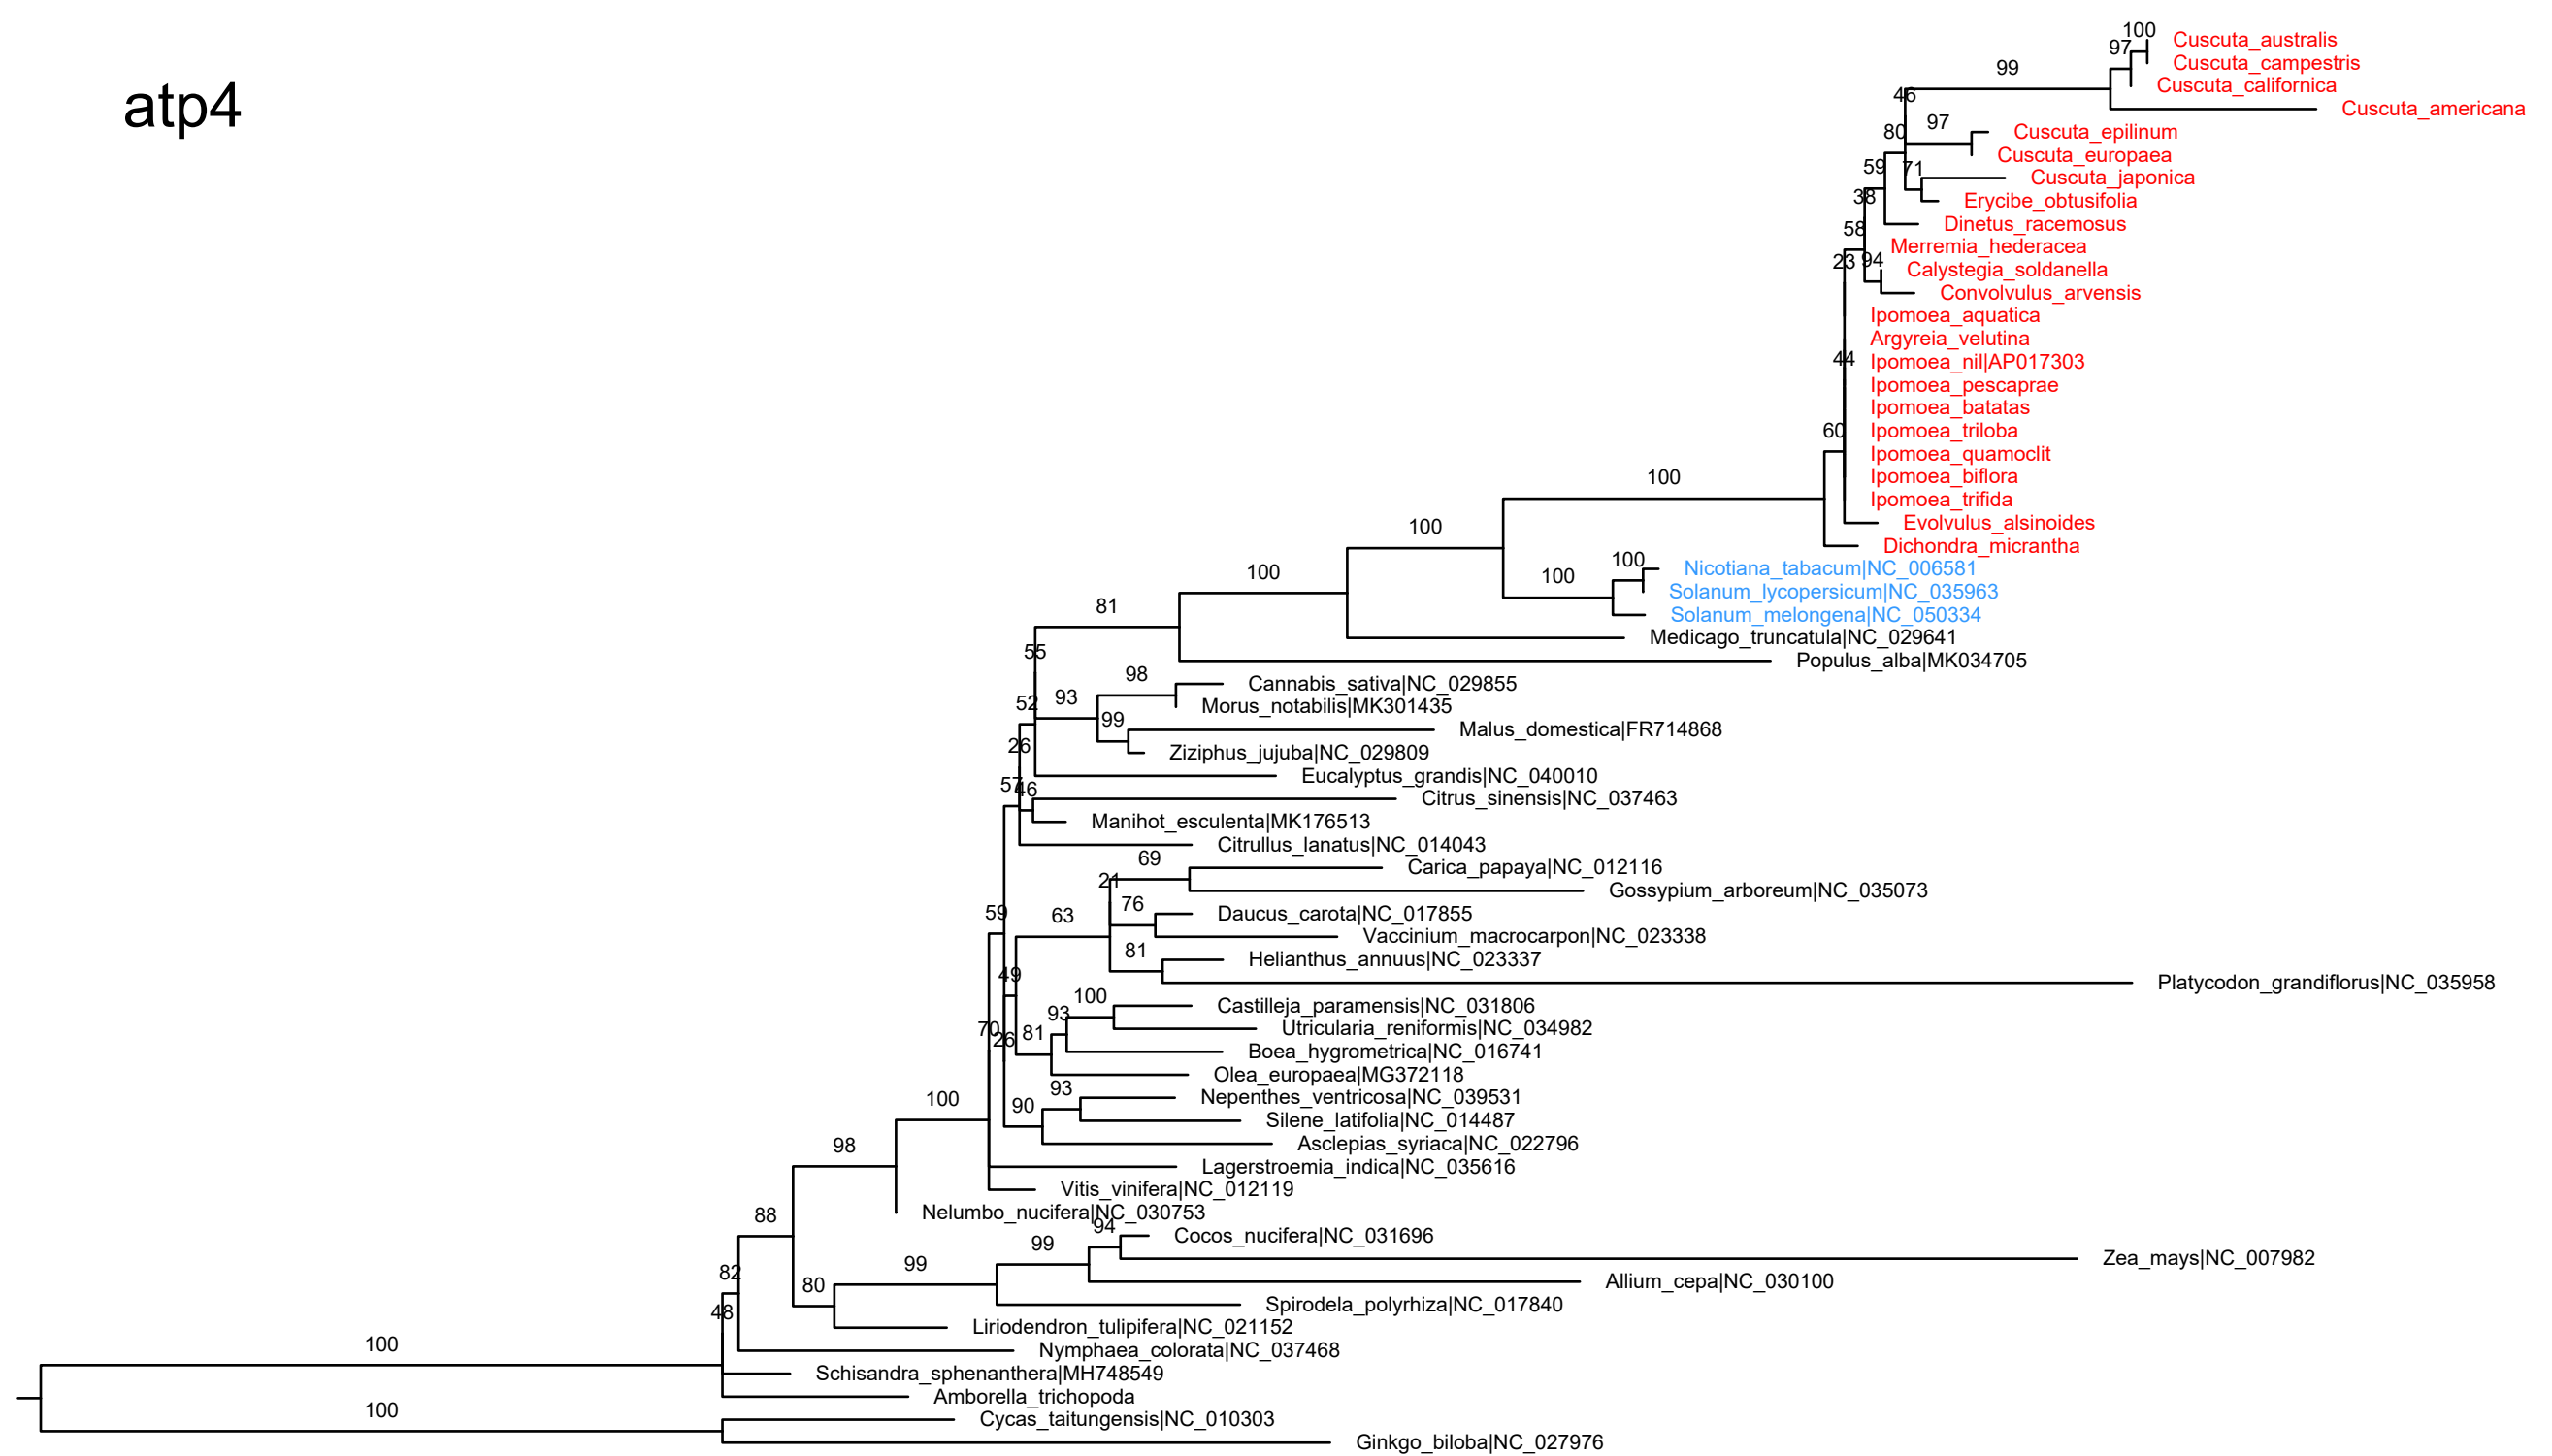

0.04

# atp6

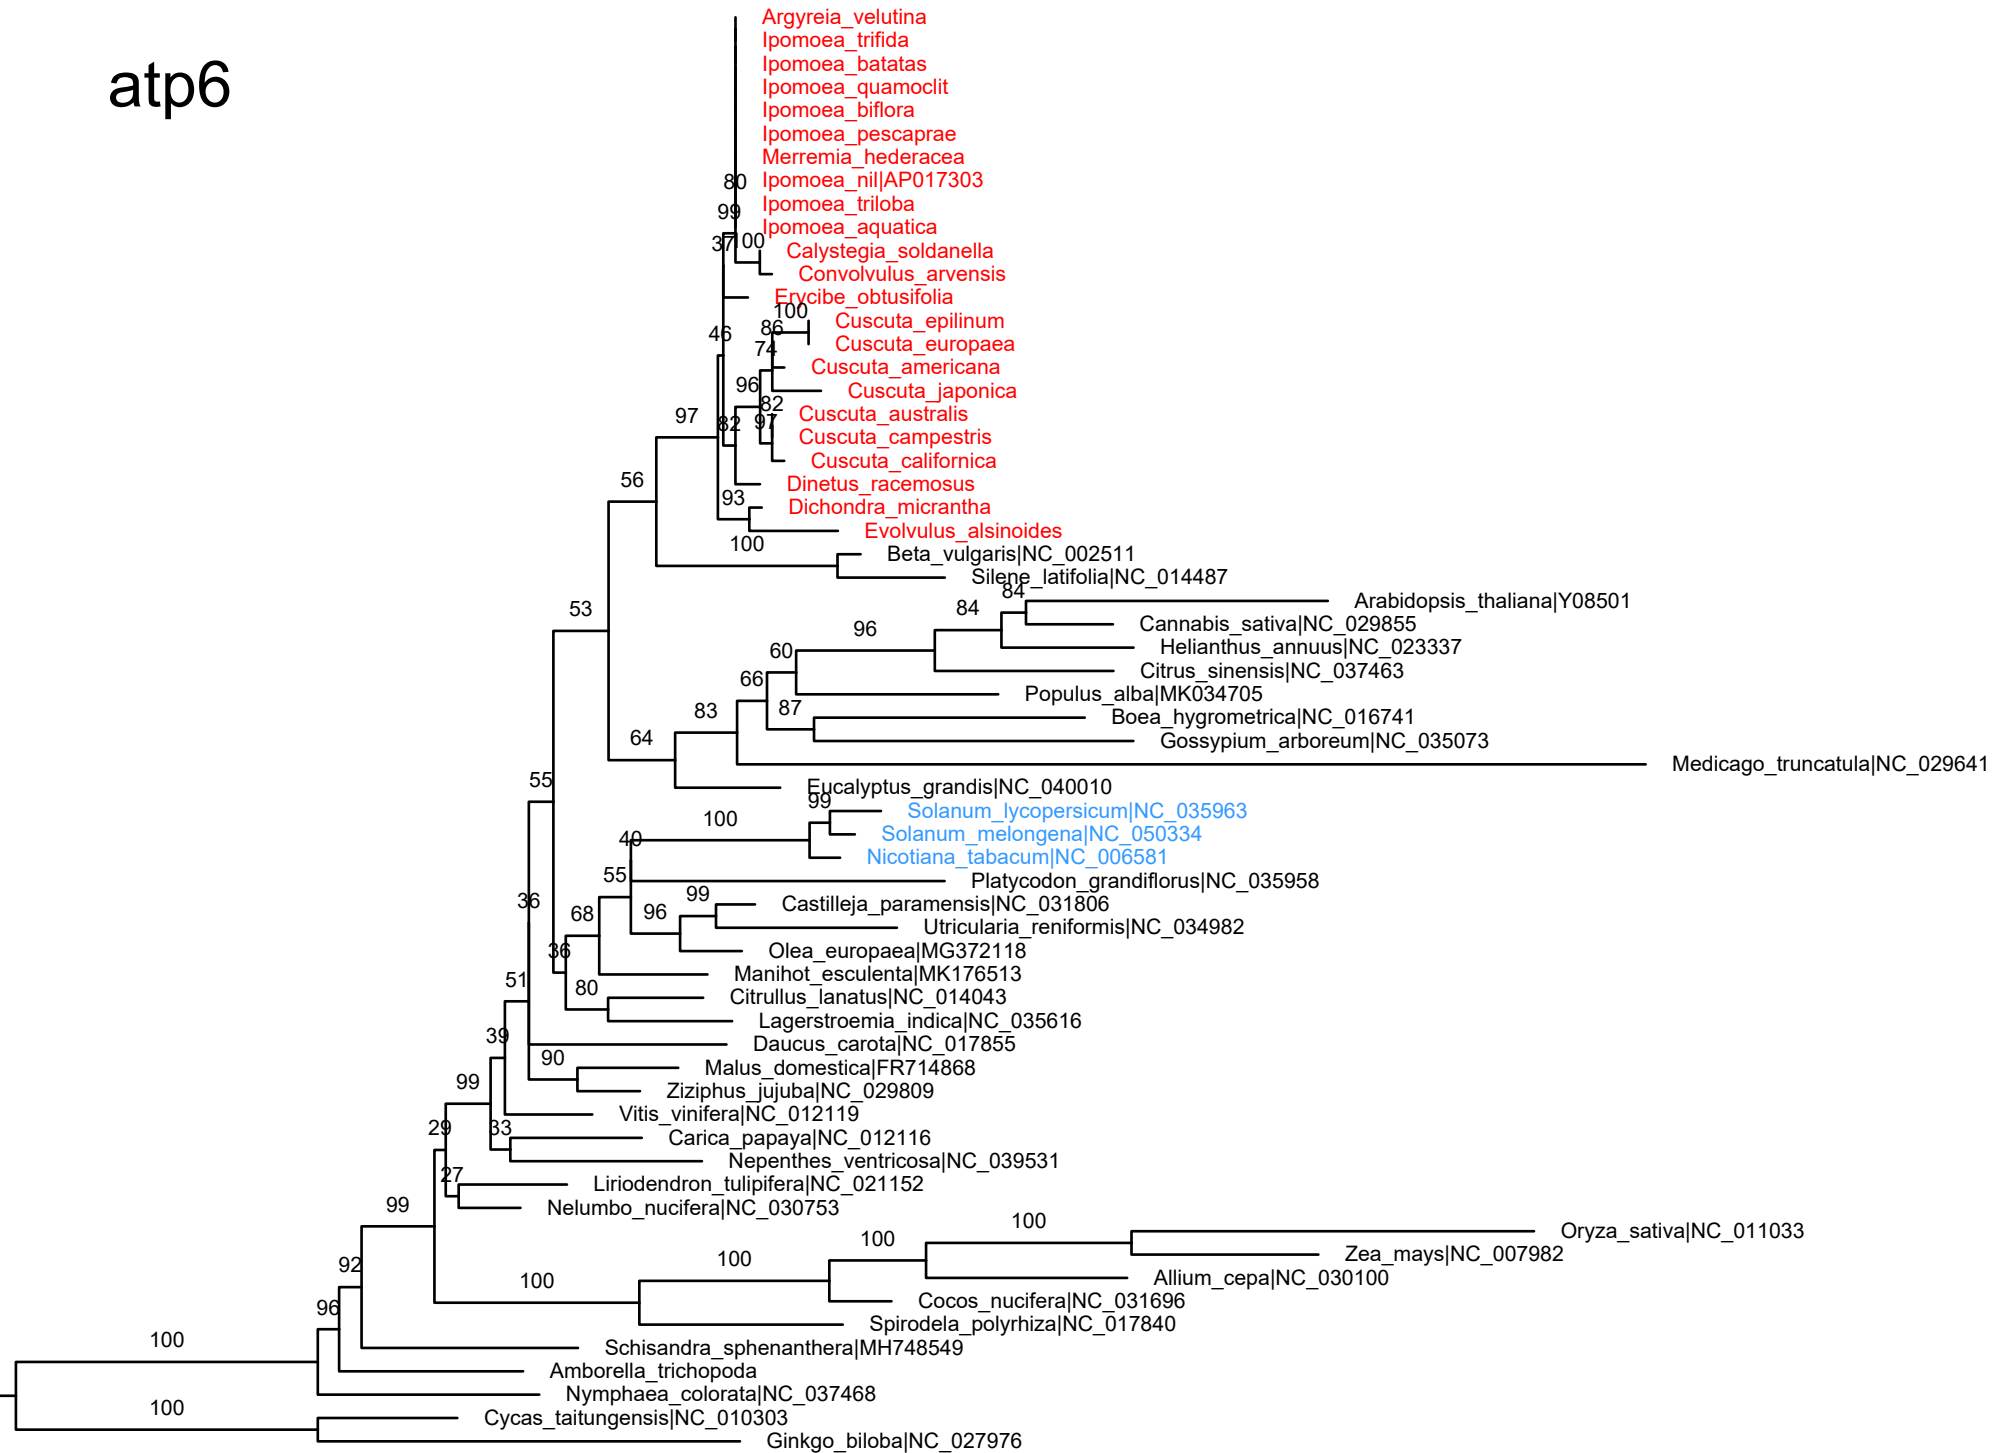

0.03

atp8

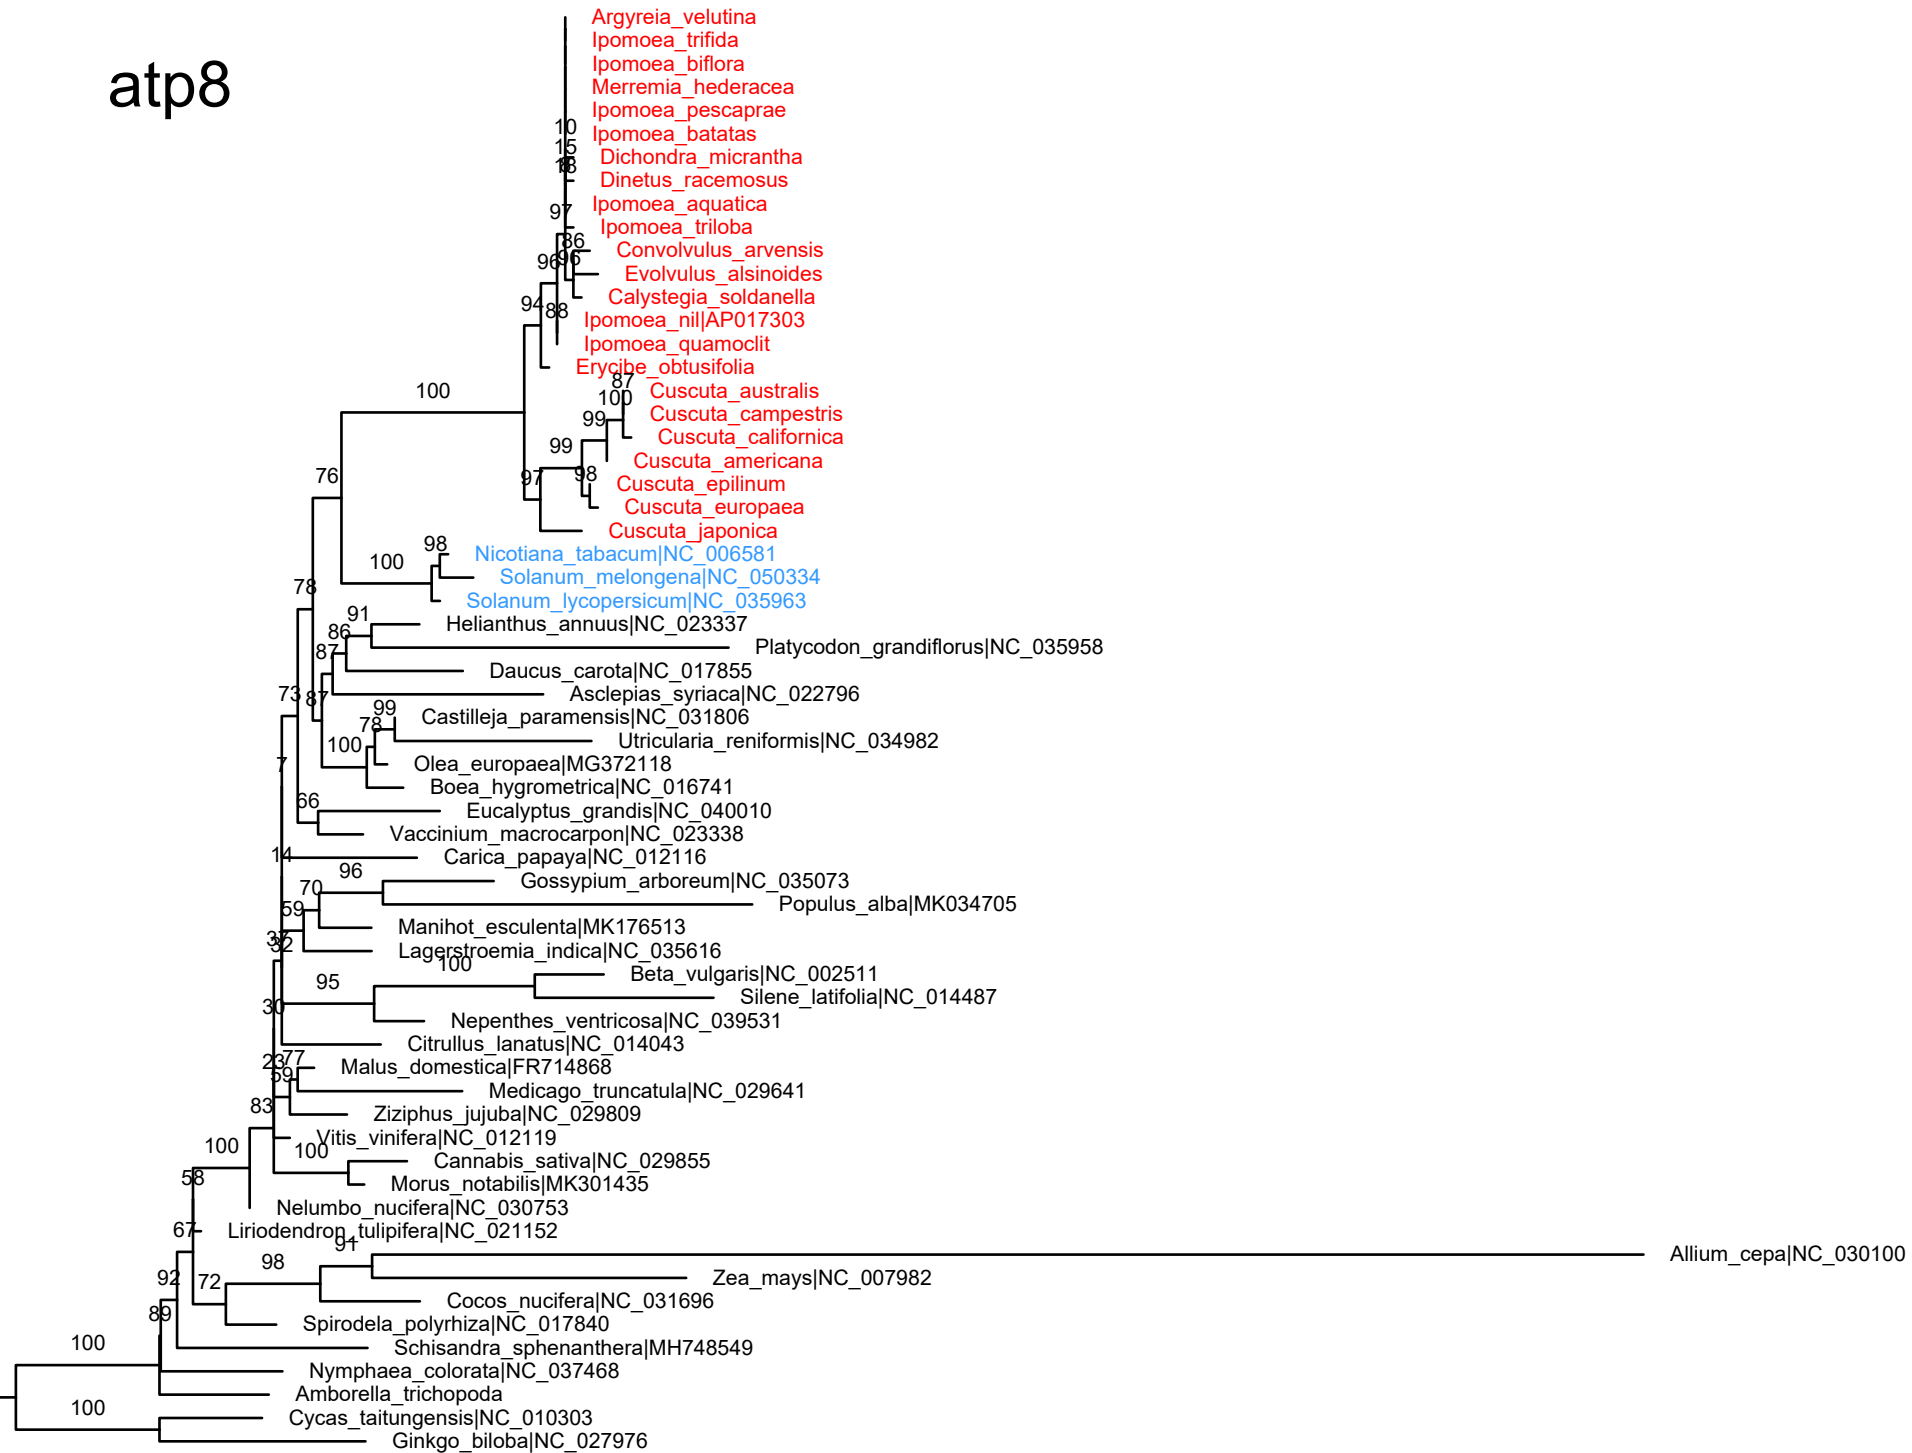

0.06

# atp9

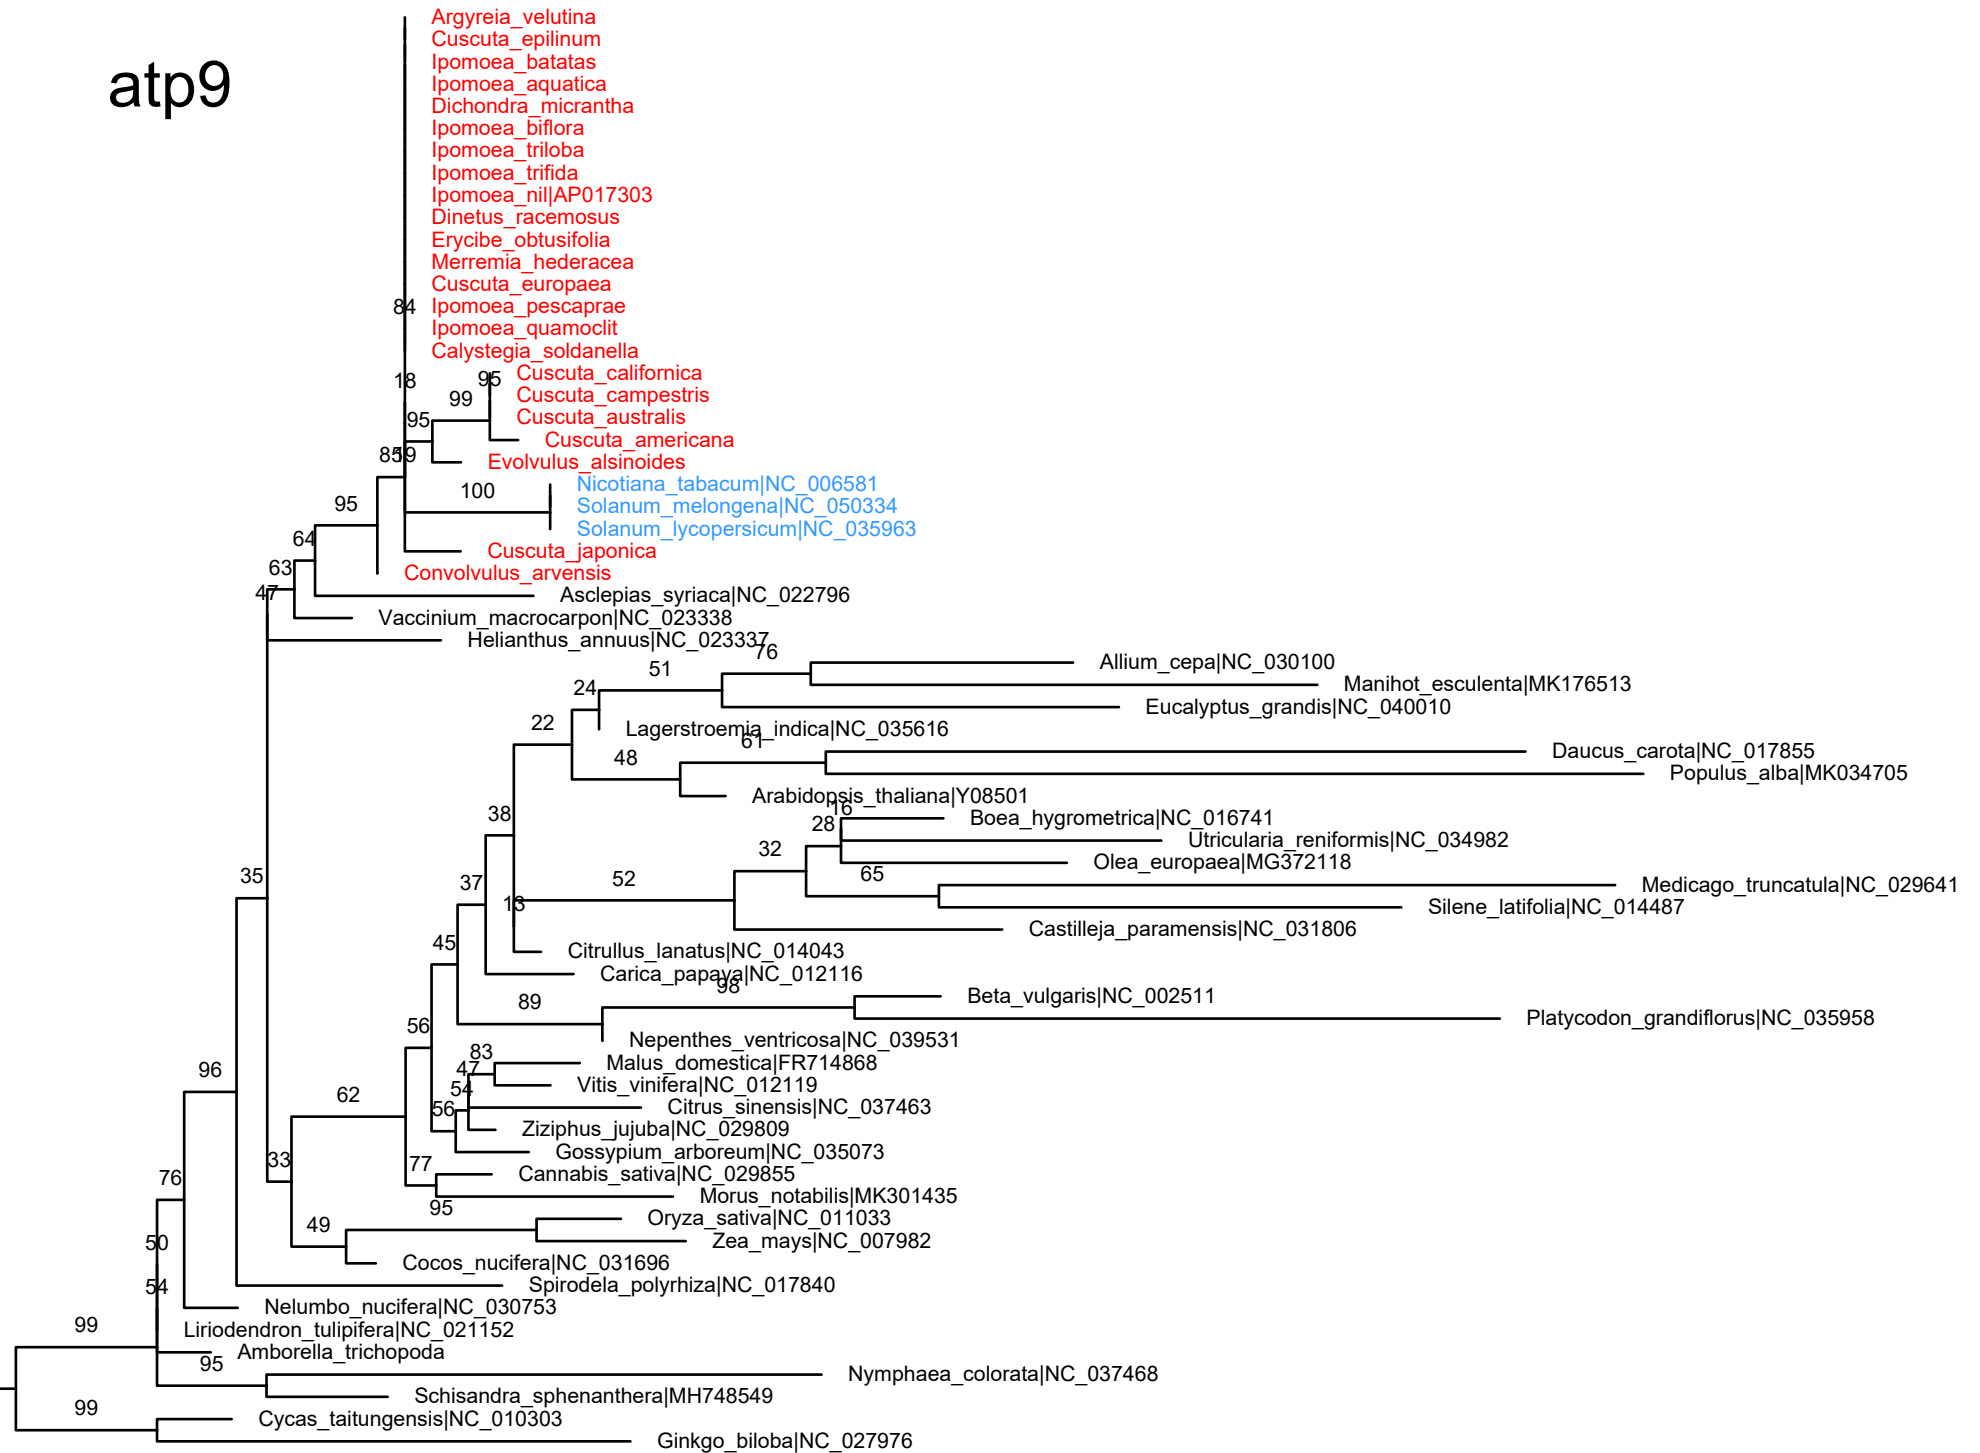

0.04

ccmb

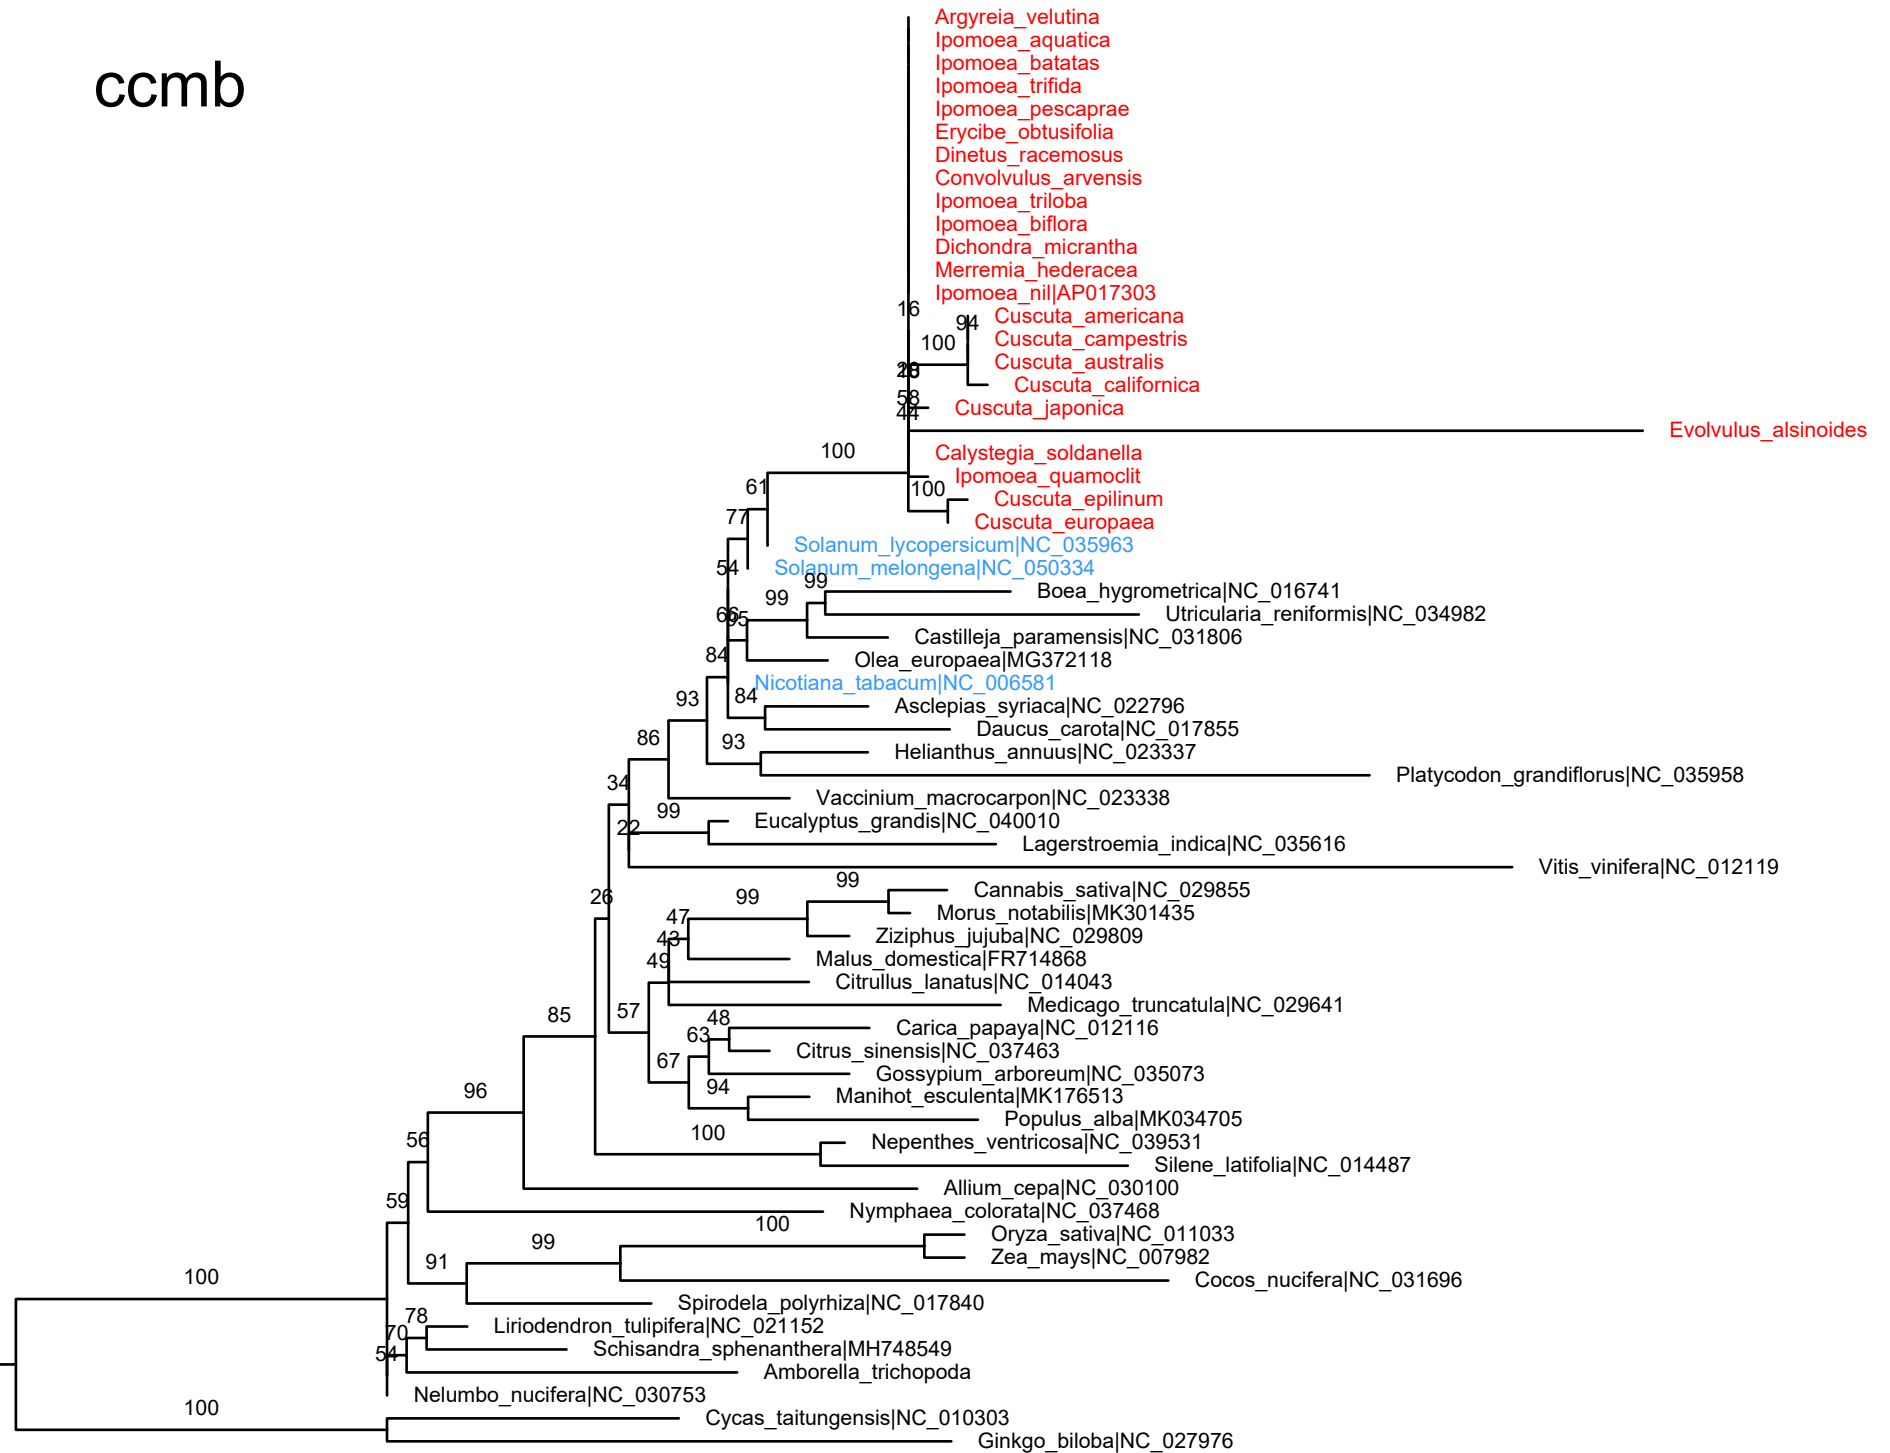

0.02

ccmc

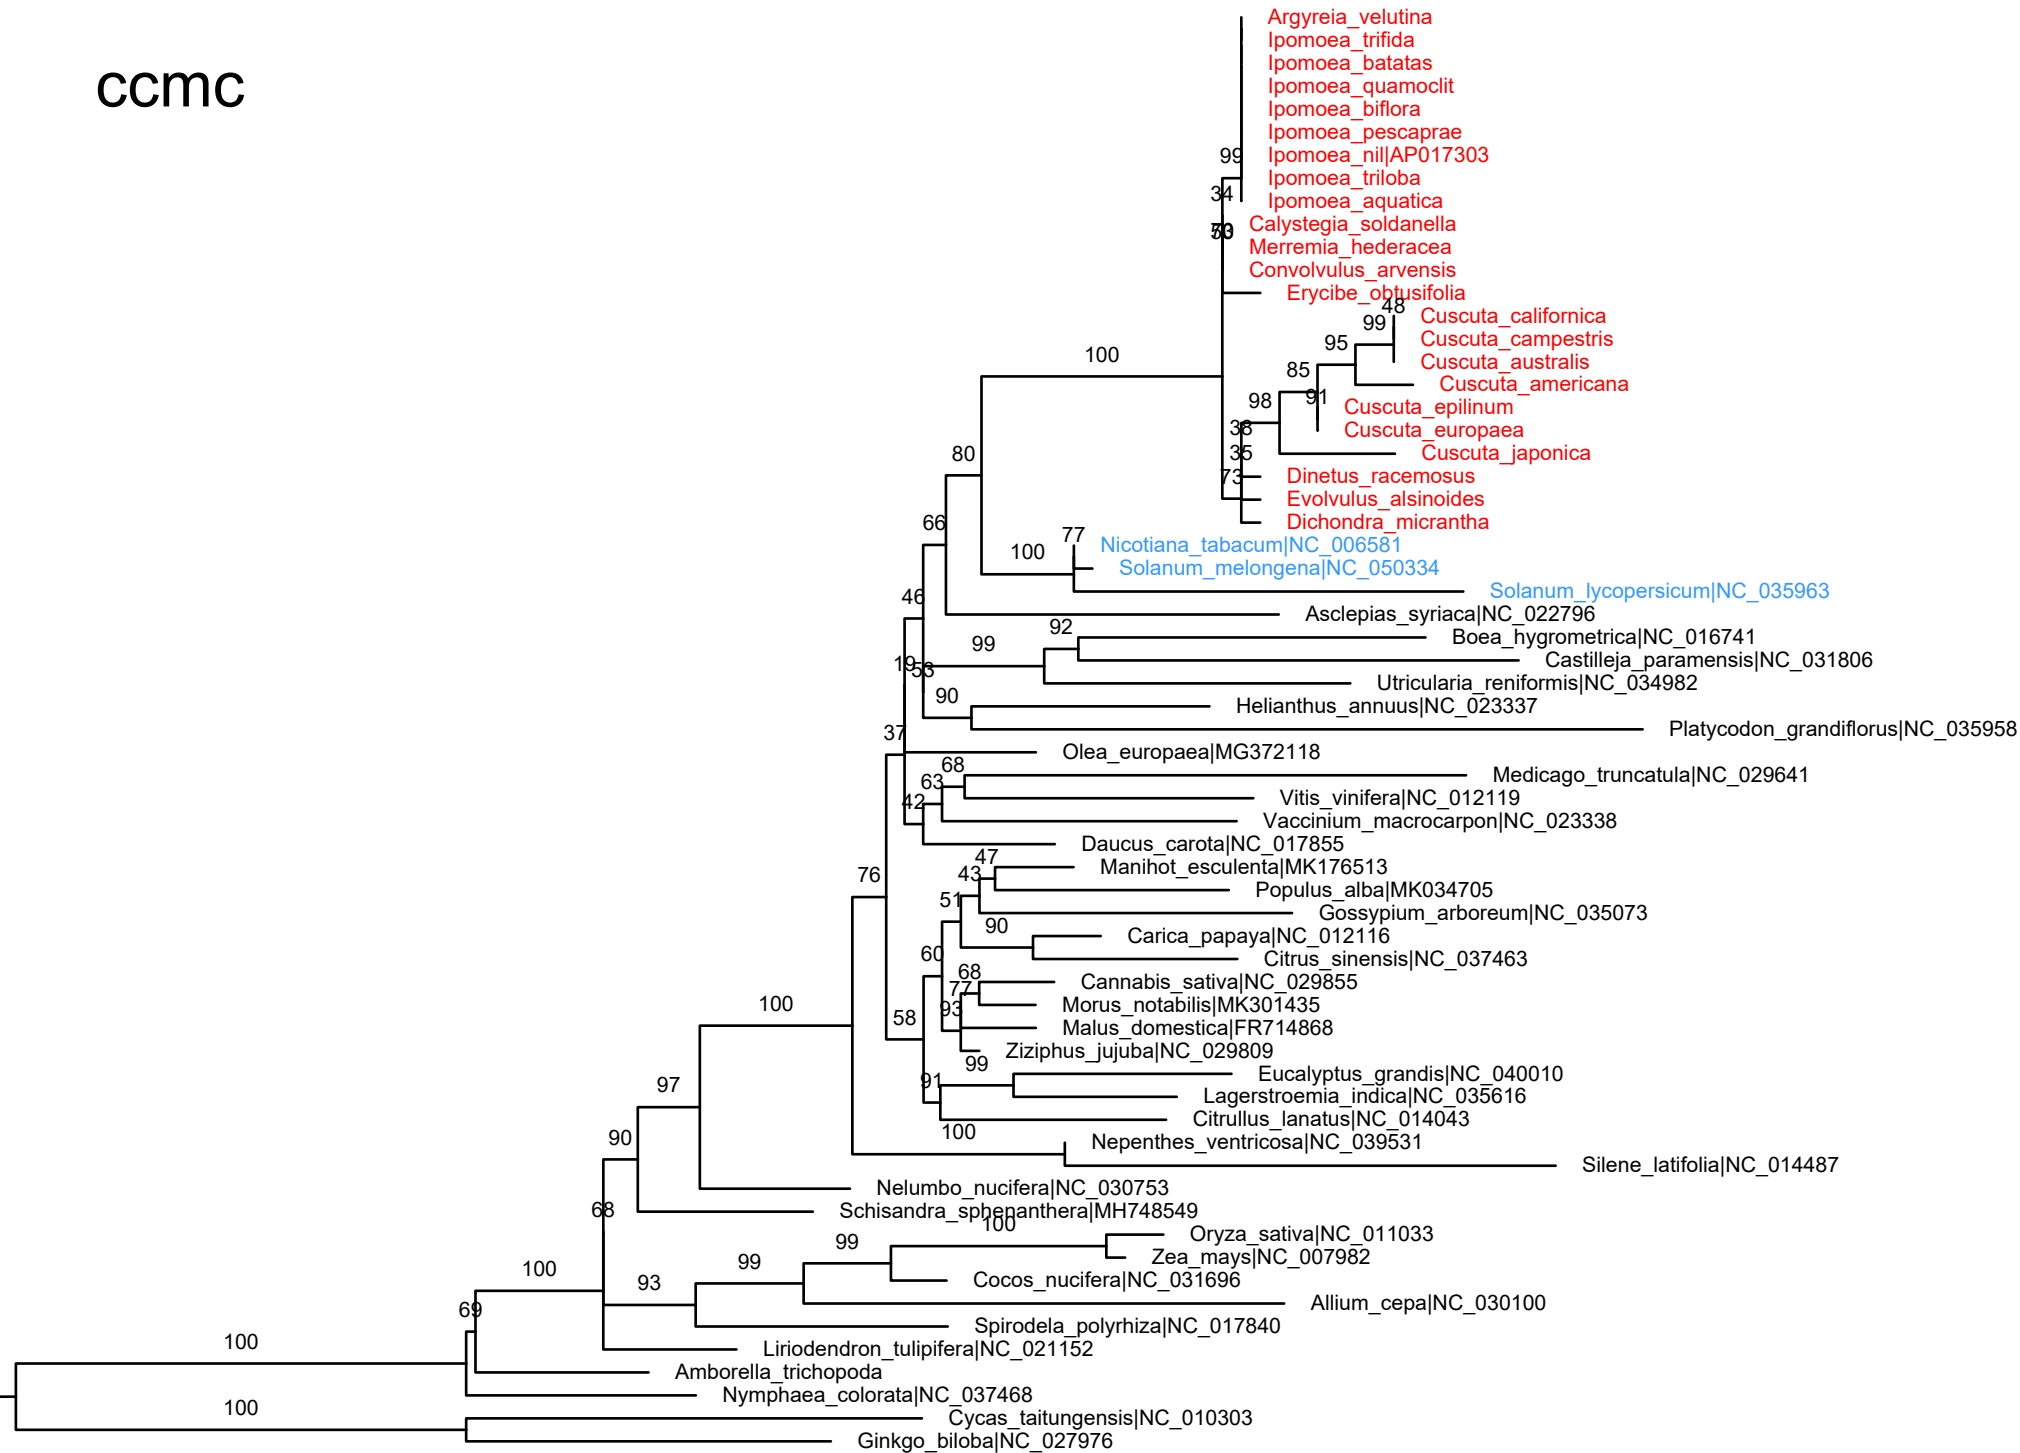

0.02

ccmfc1

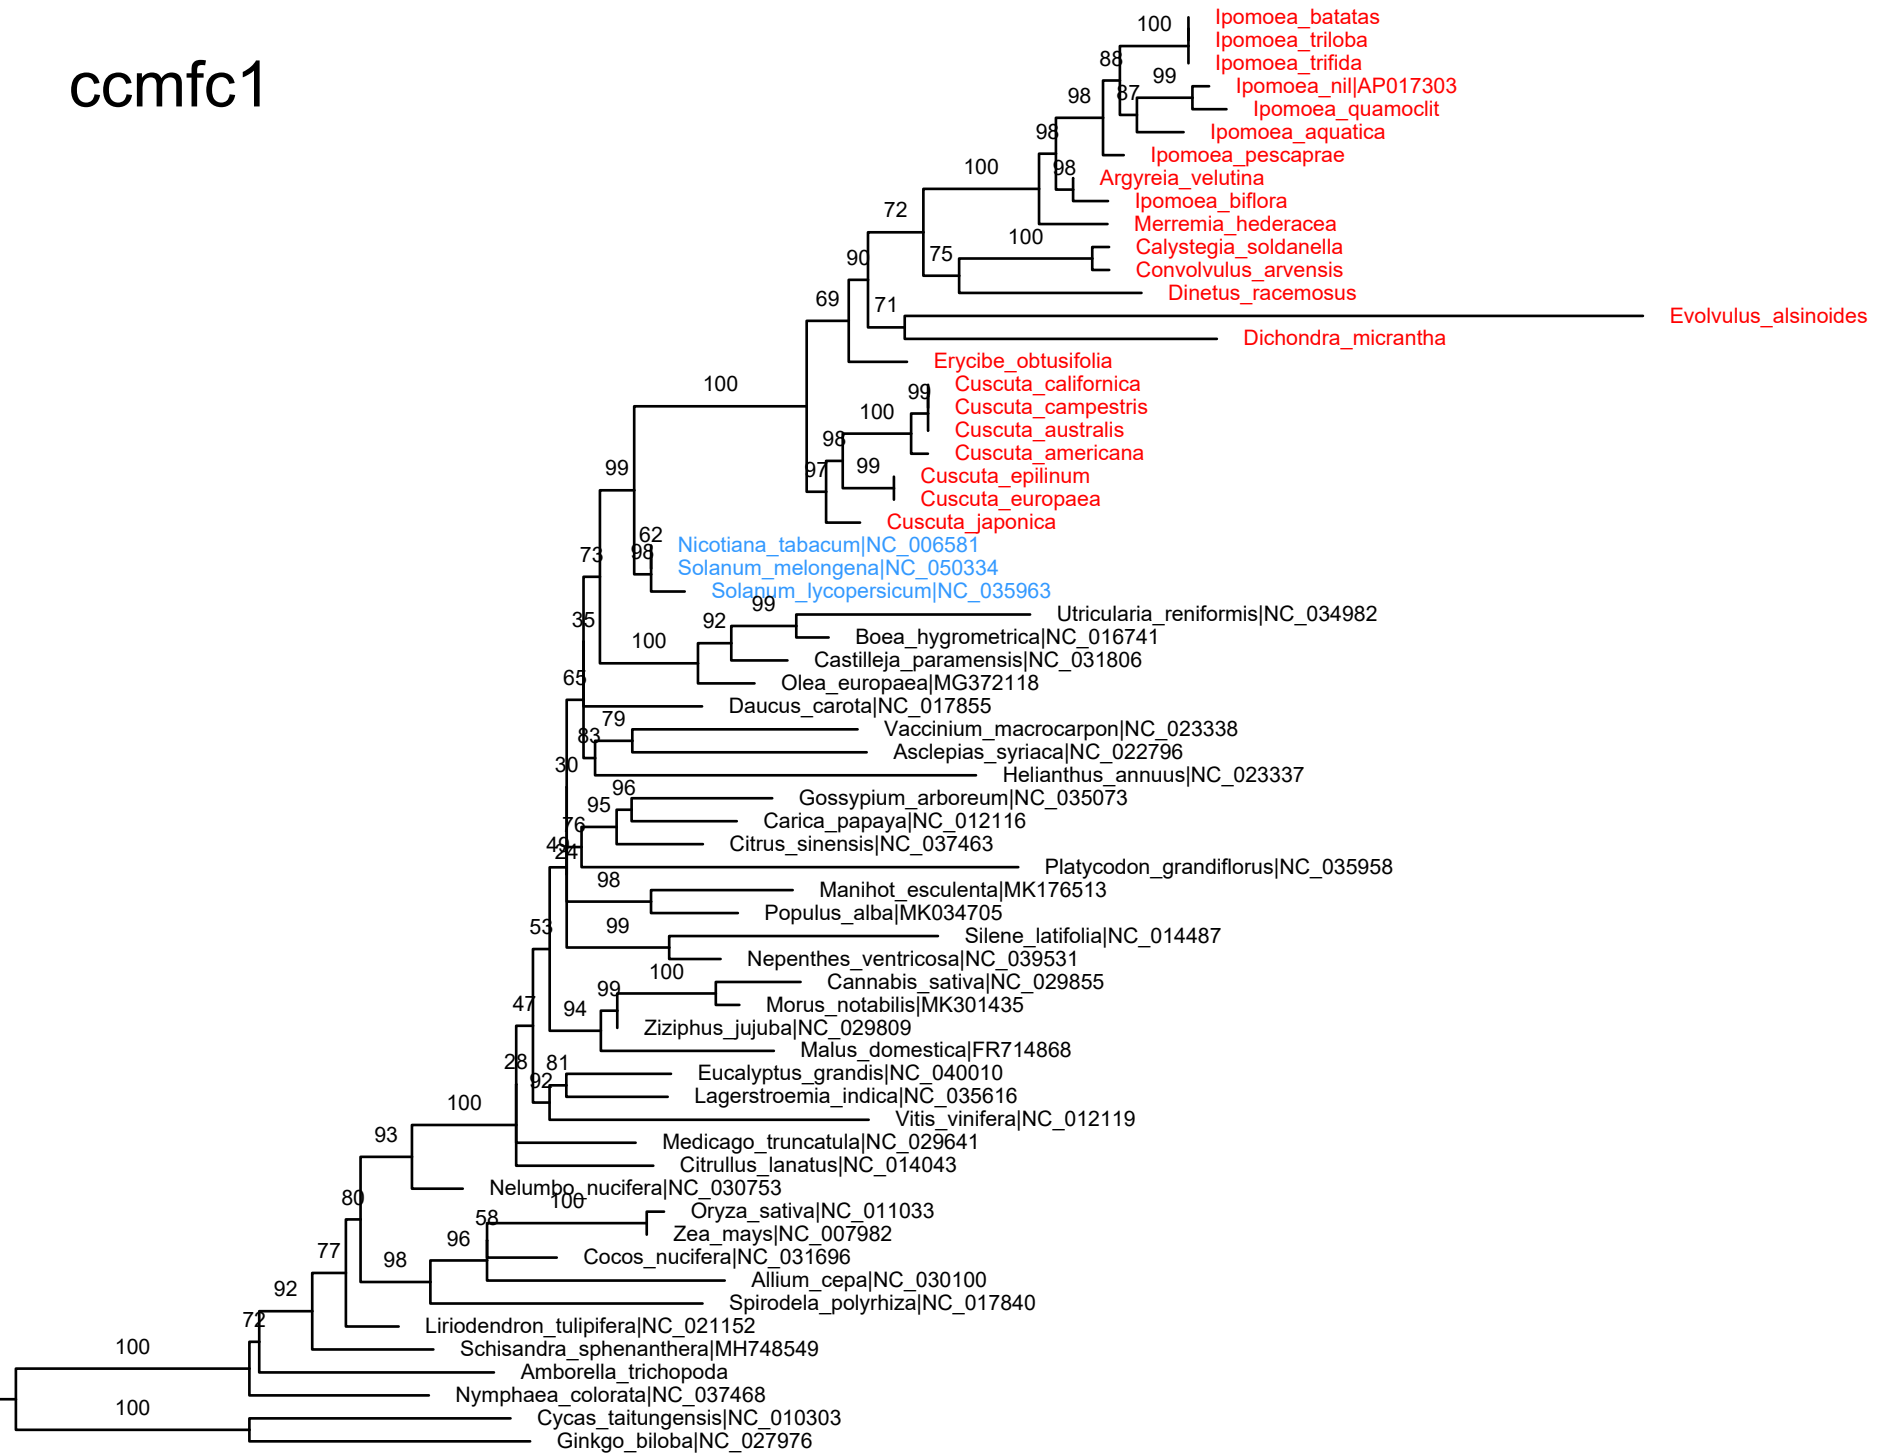

0.03



ccmfc2

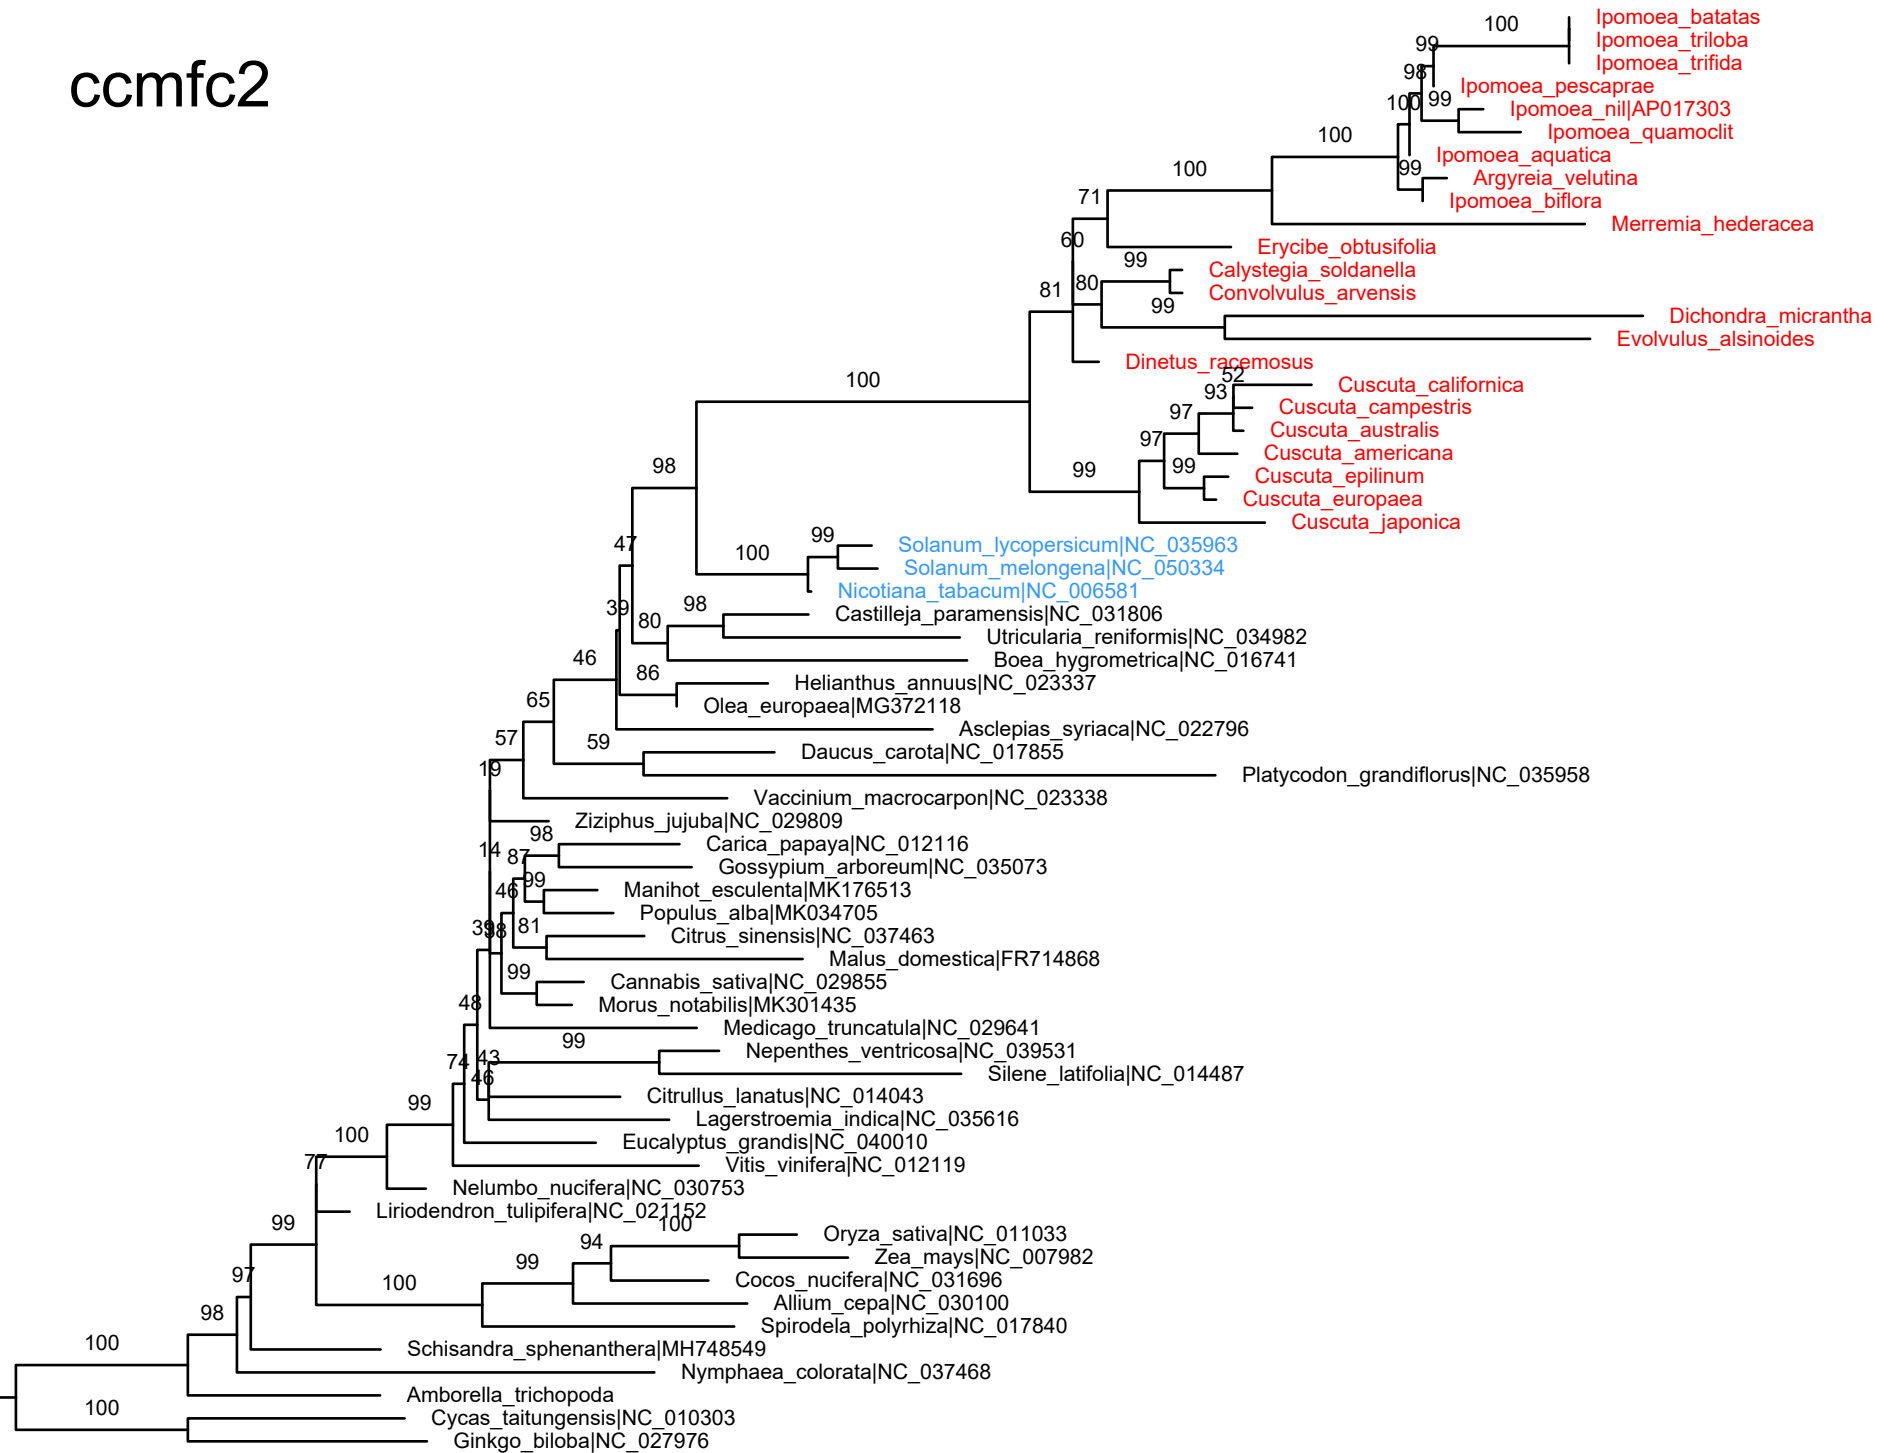

0.03

ccmf\_n

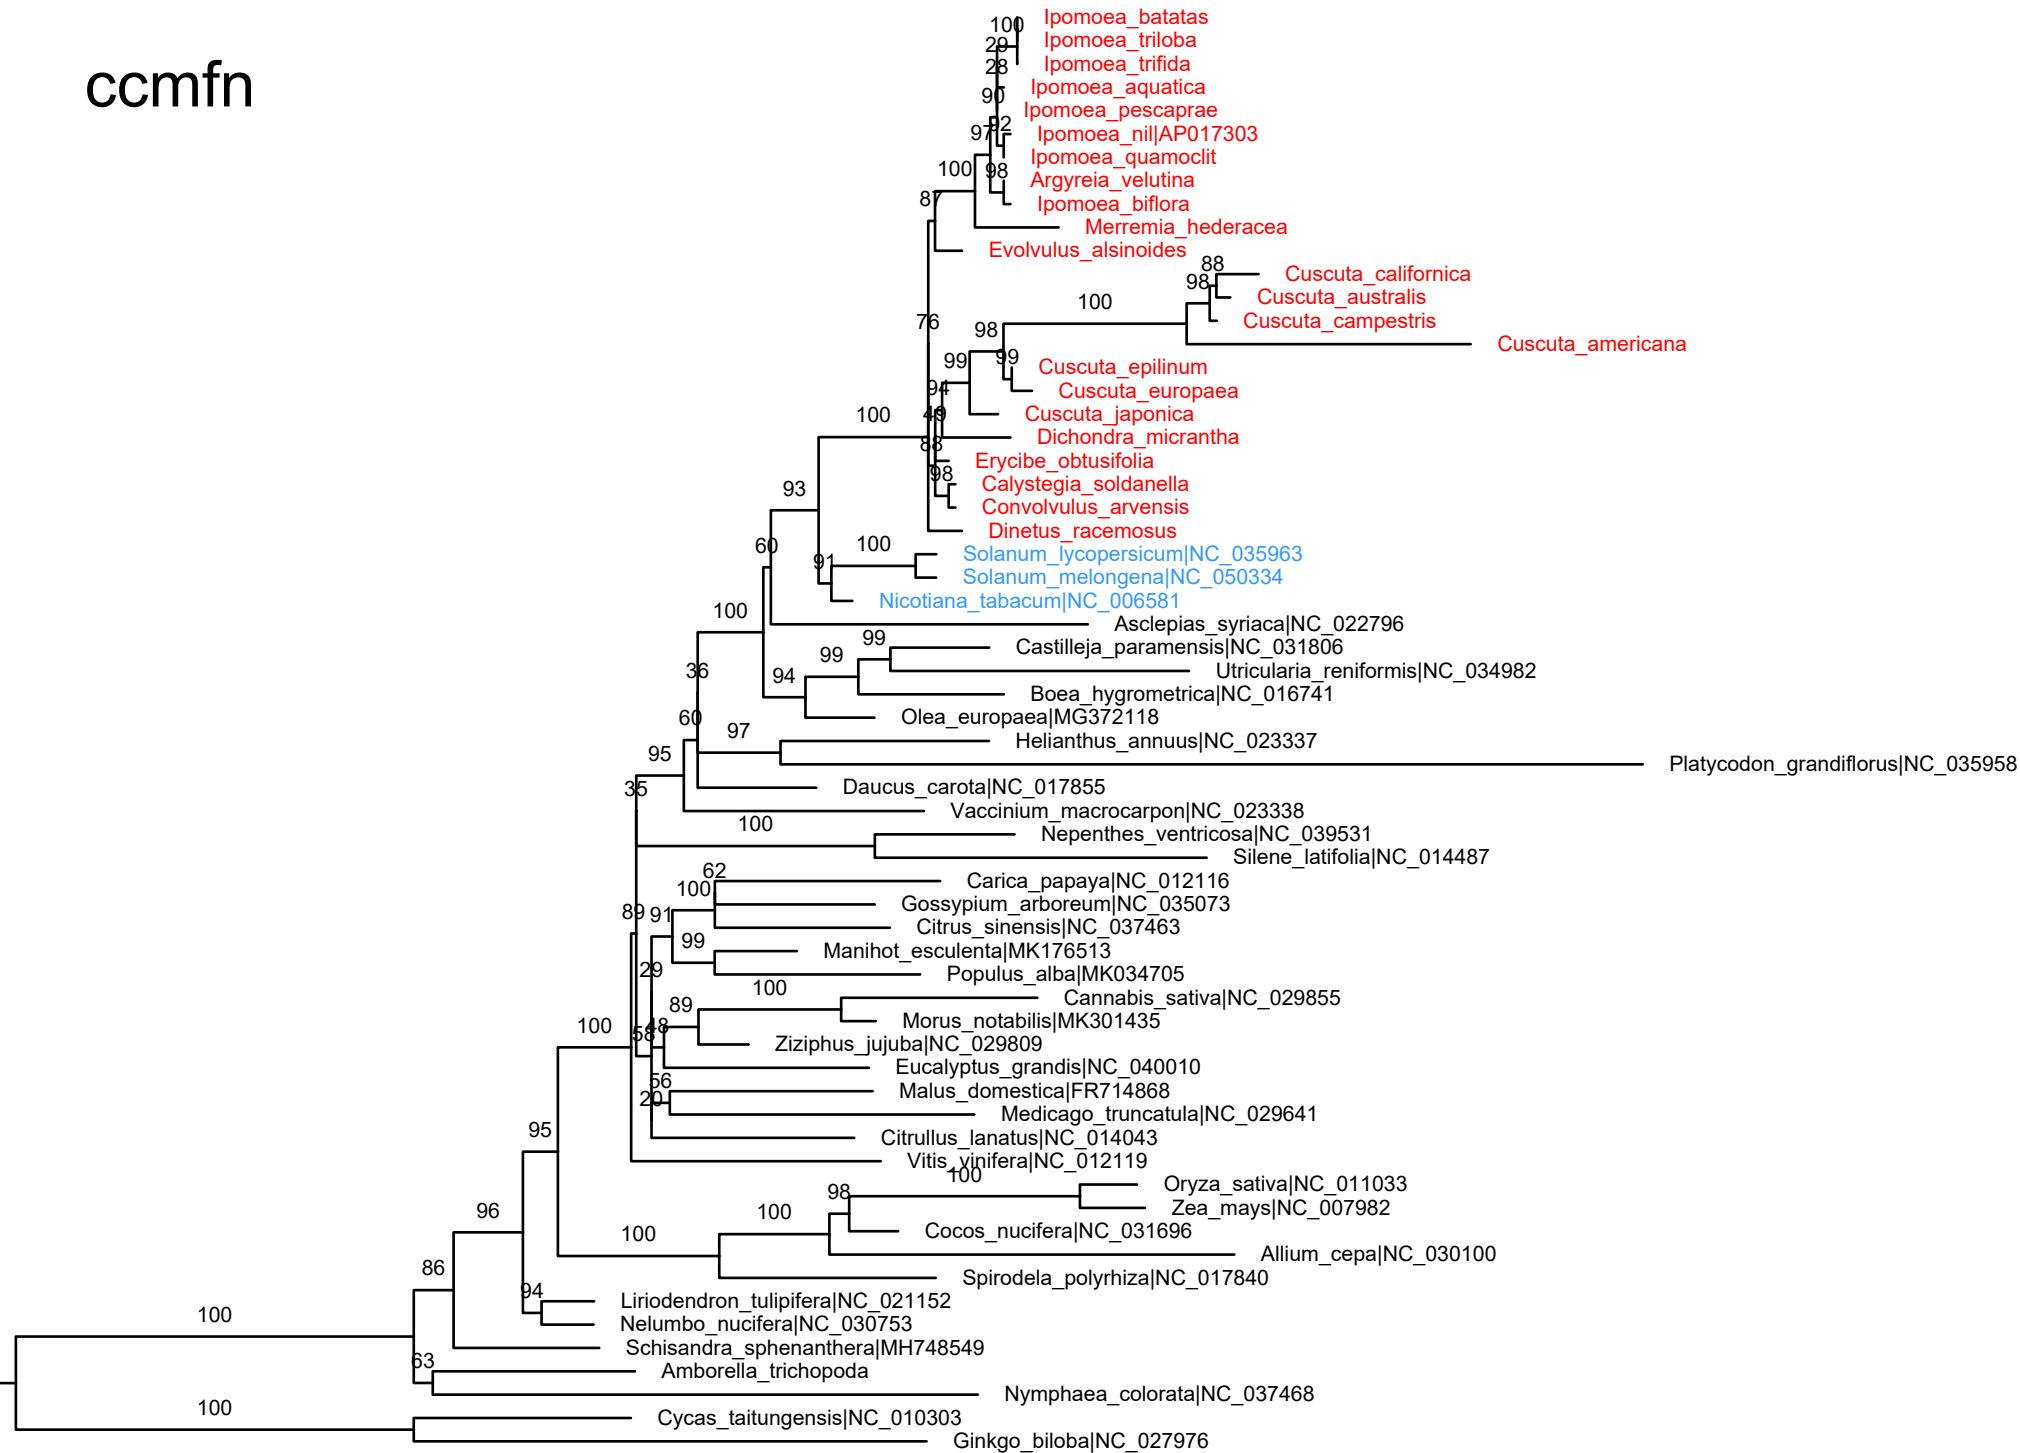

cob

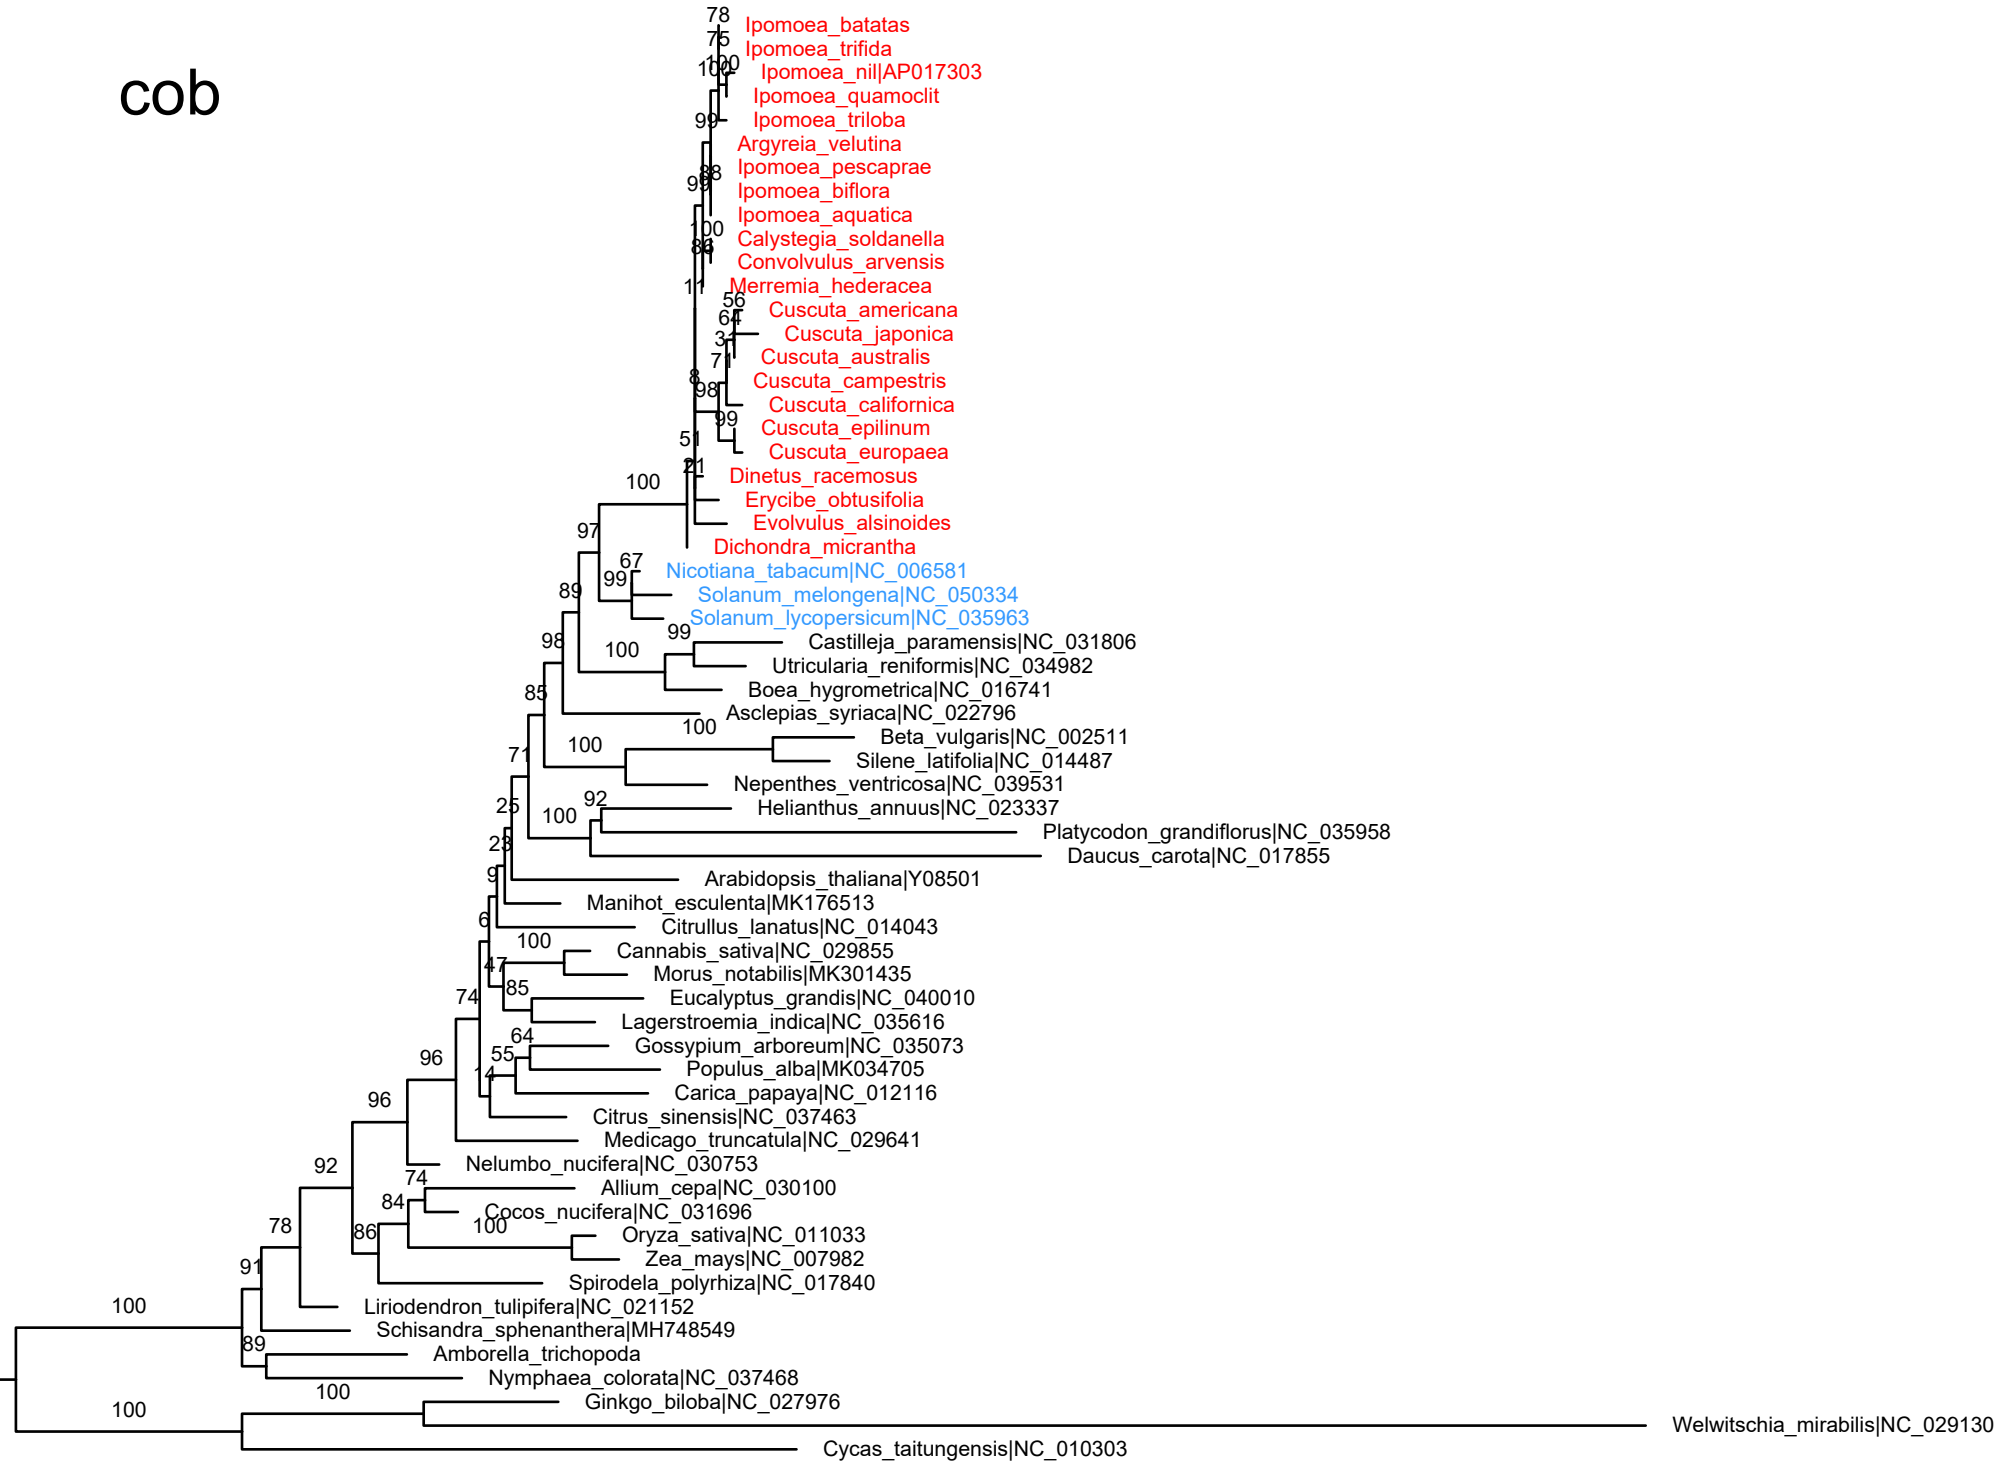

0.03

# COX1

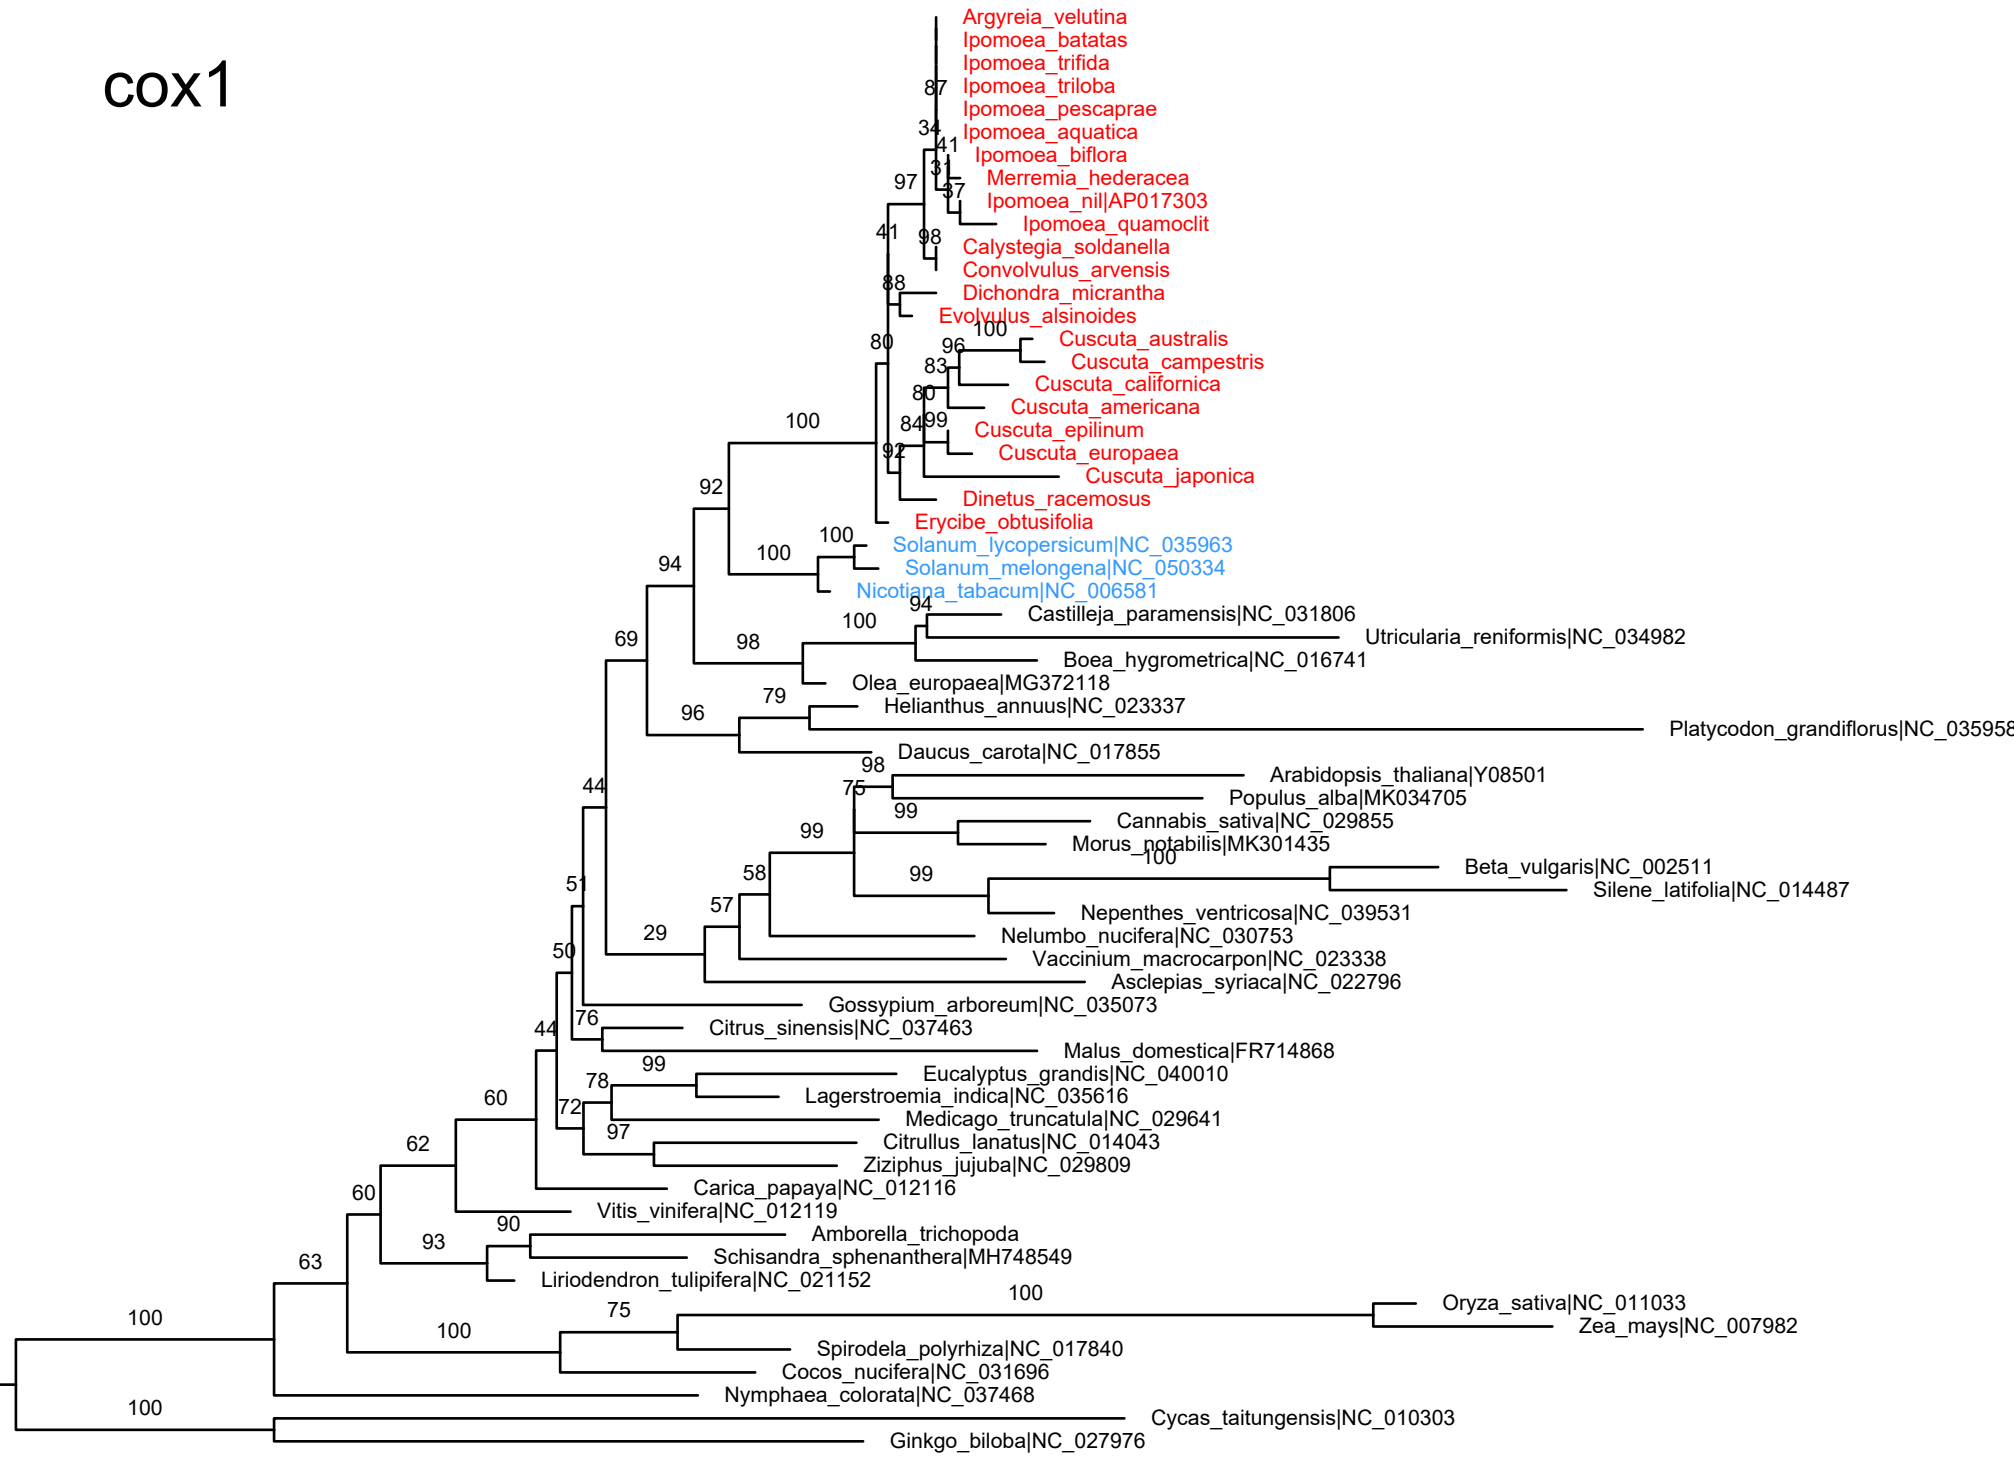

0.02

# cox2

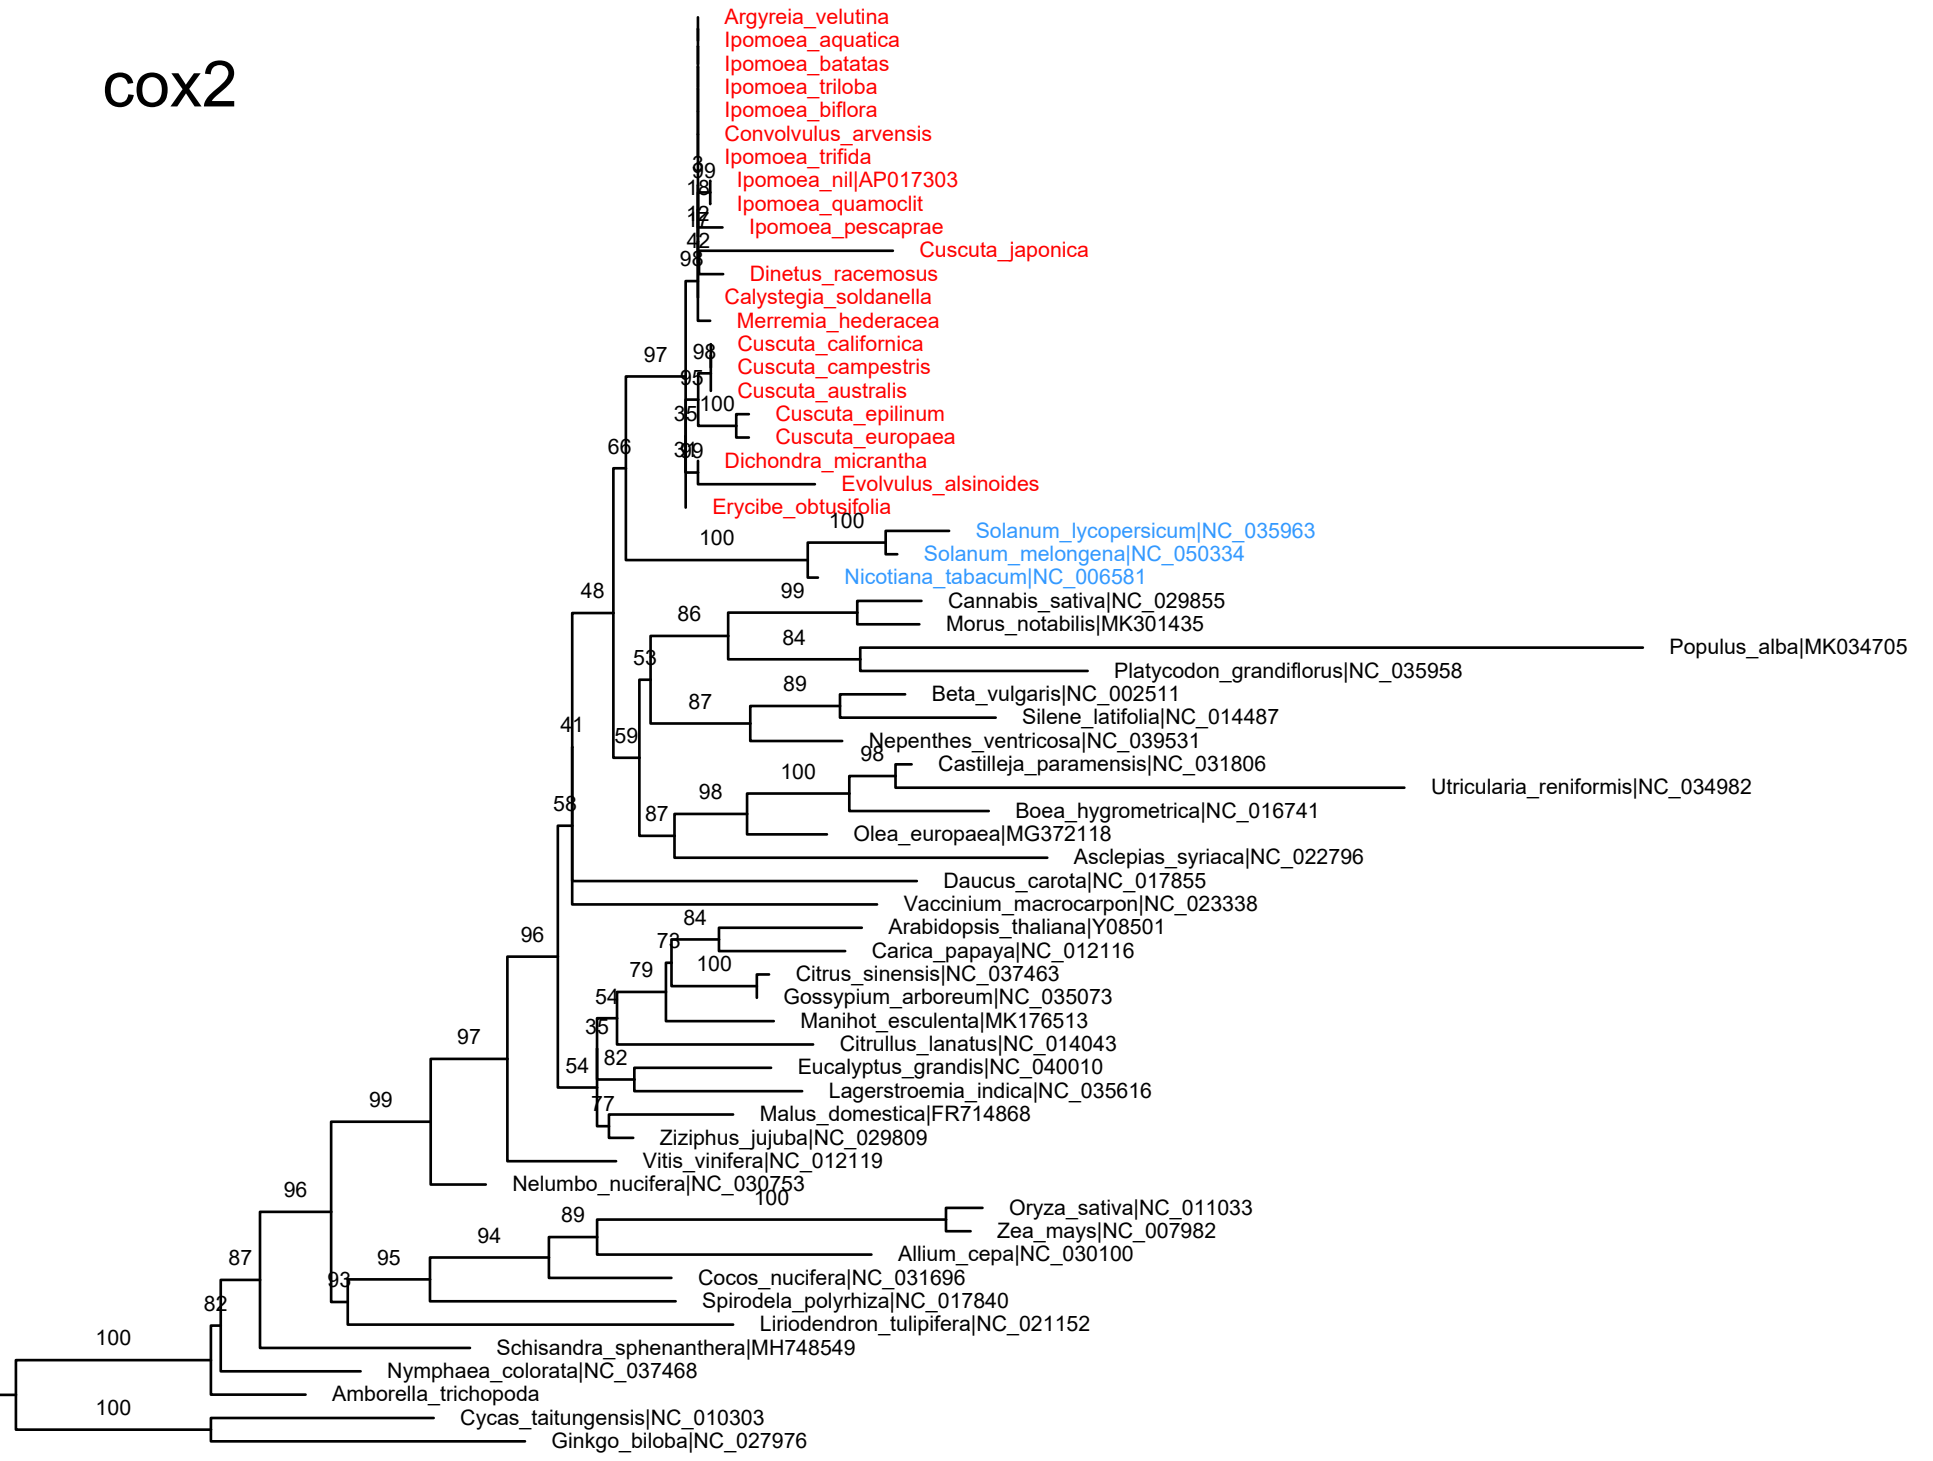

0.02

# COX3

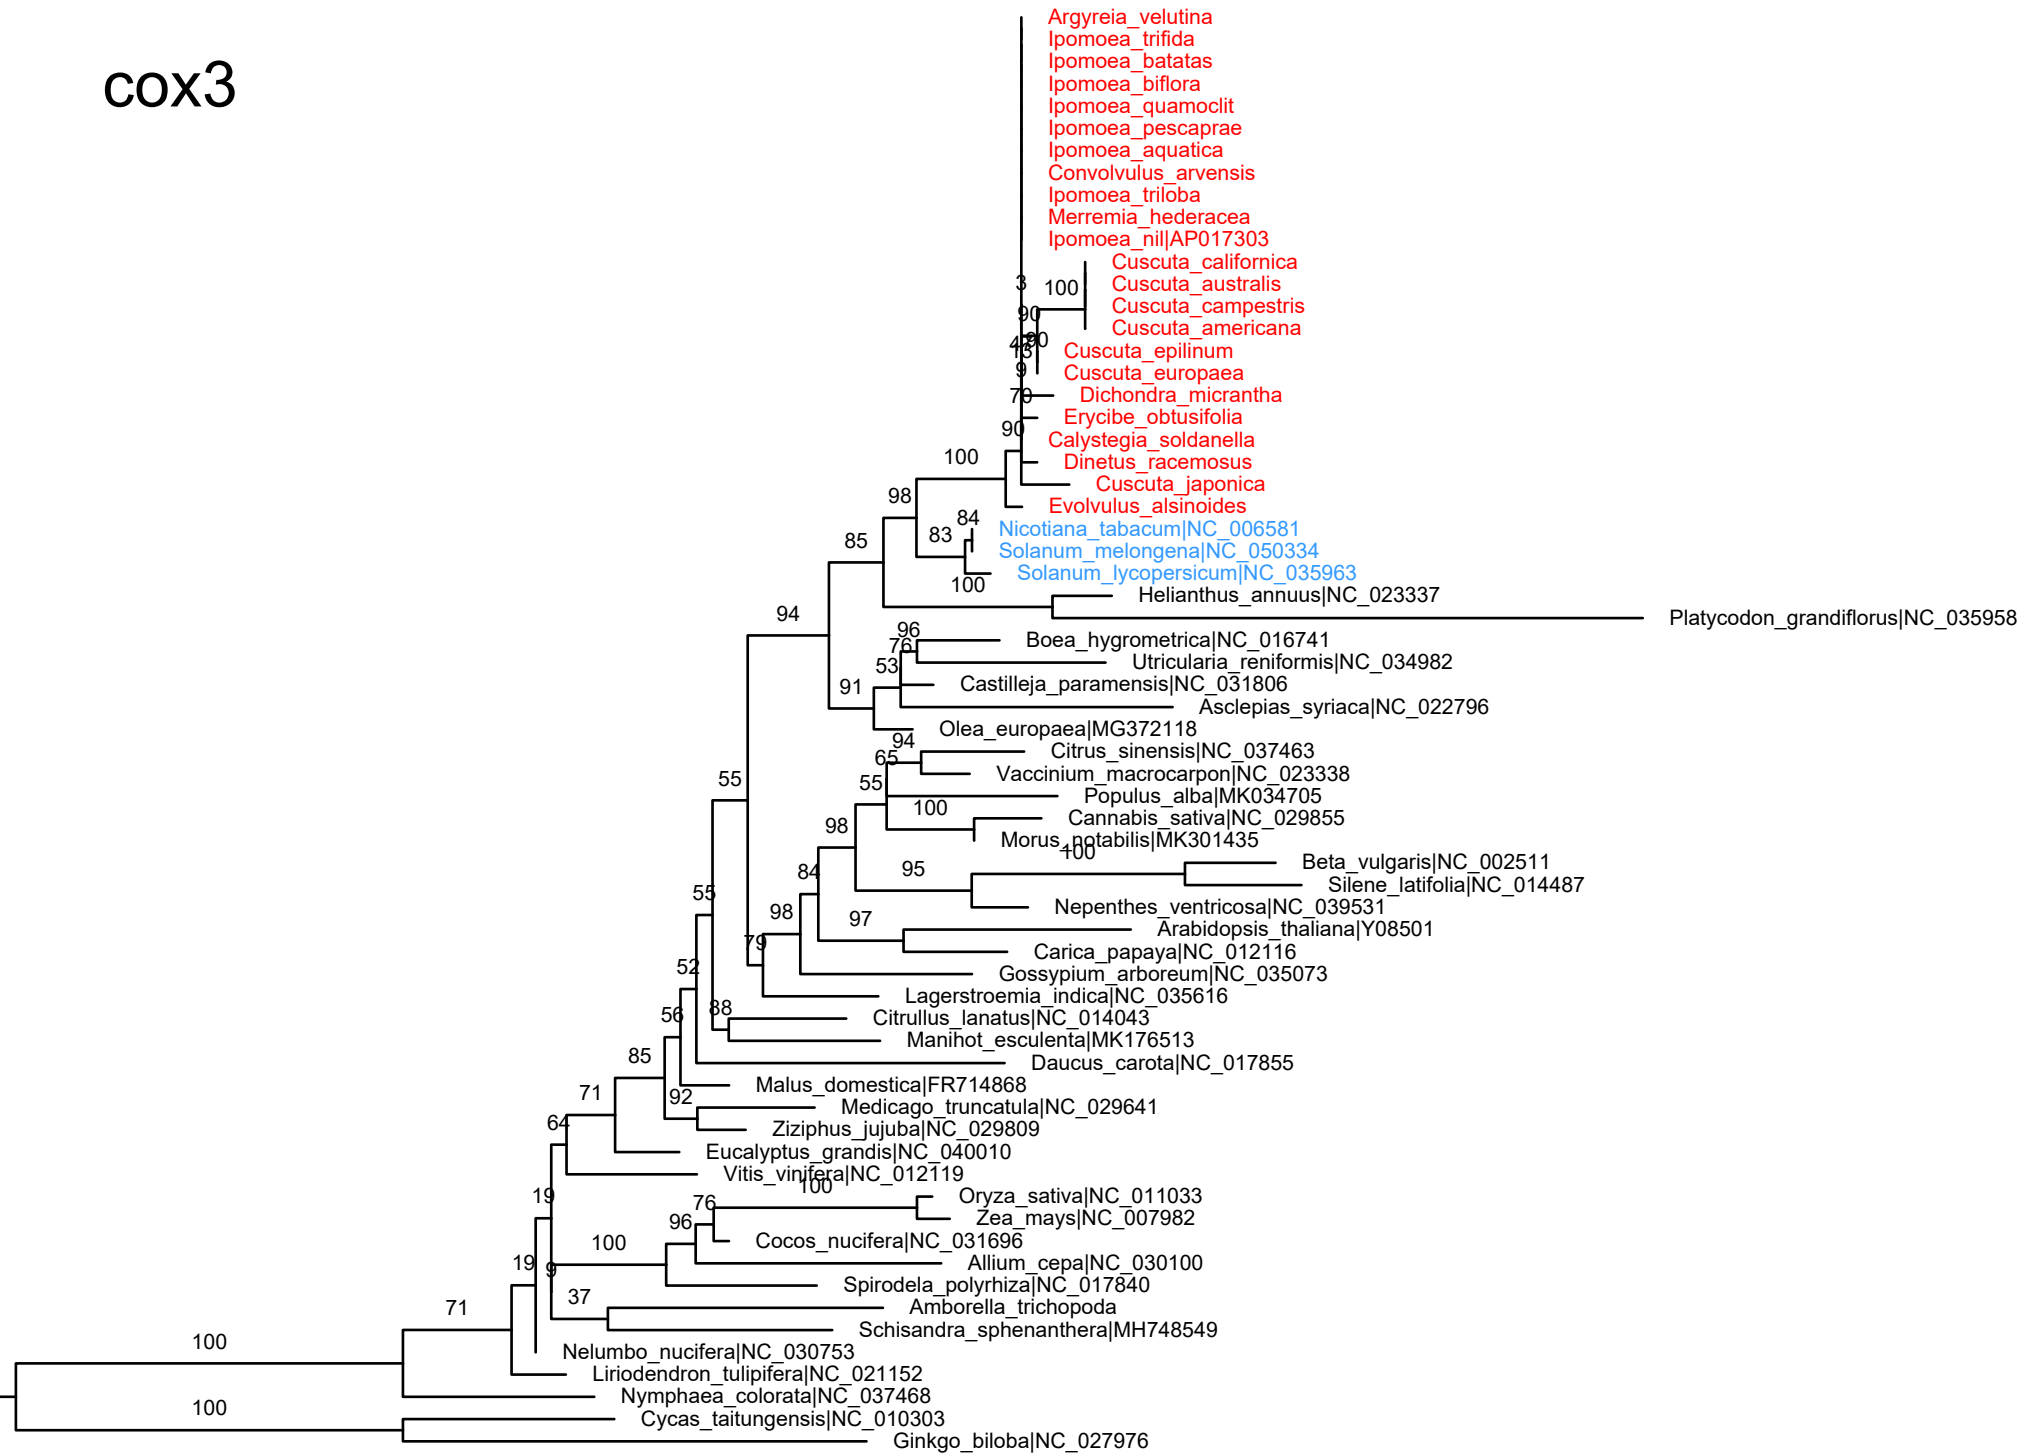

0.02

matr

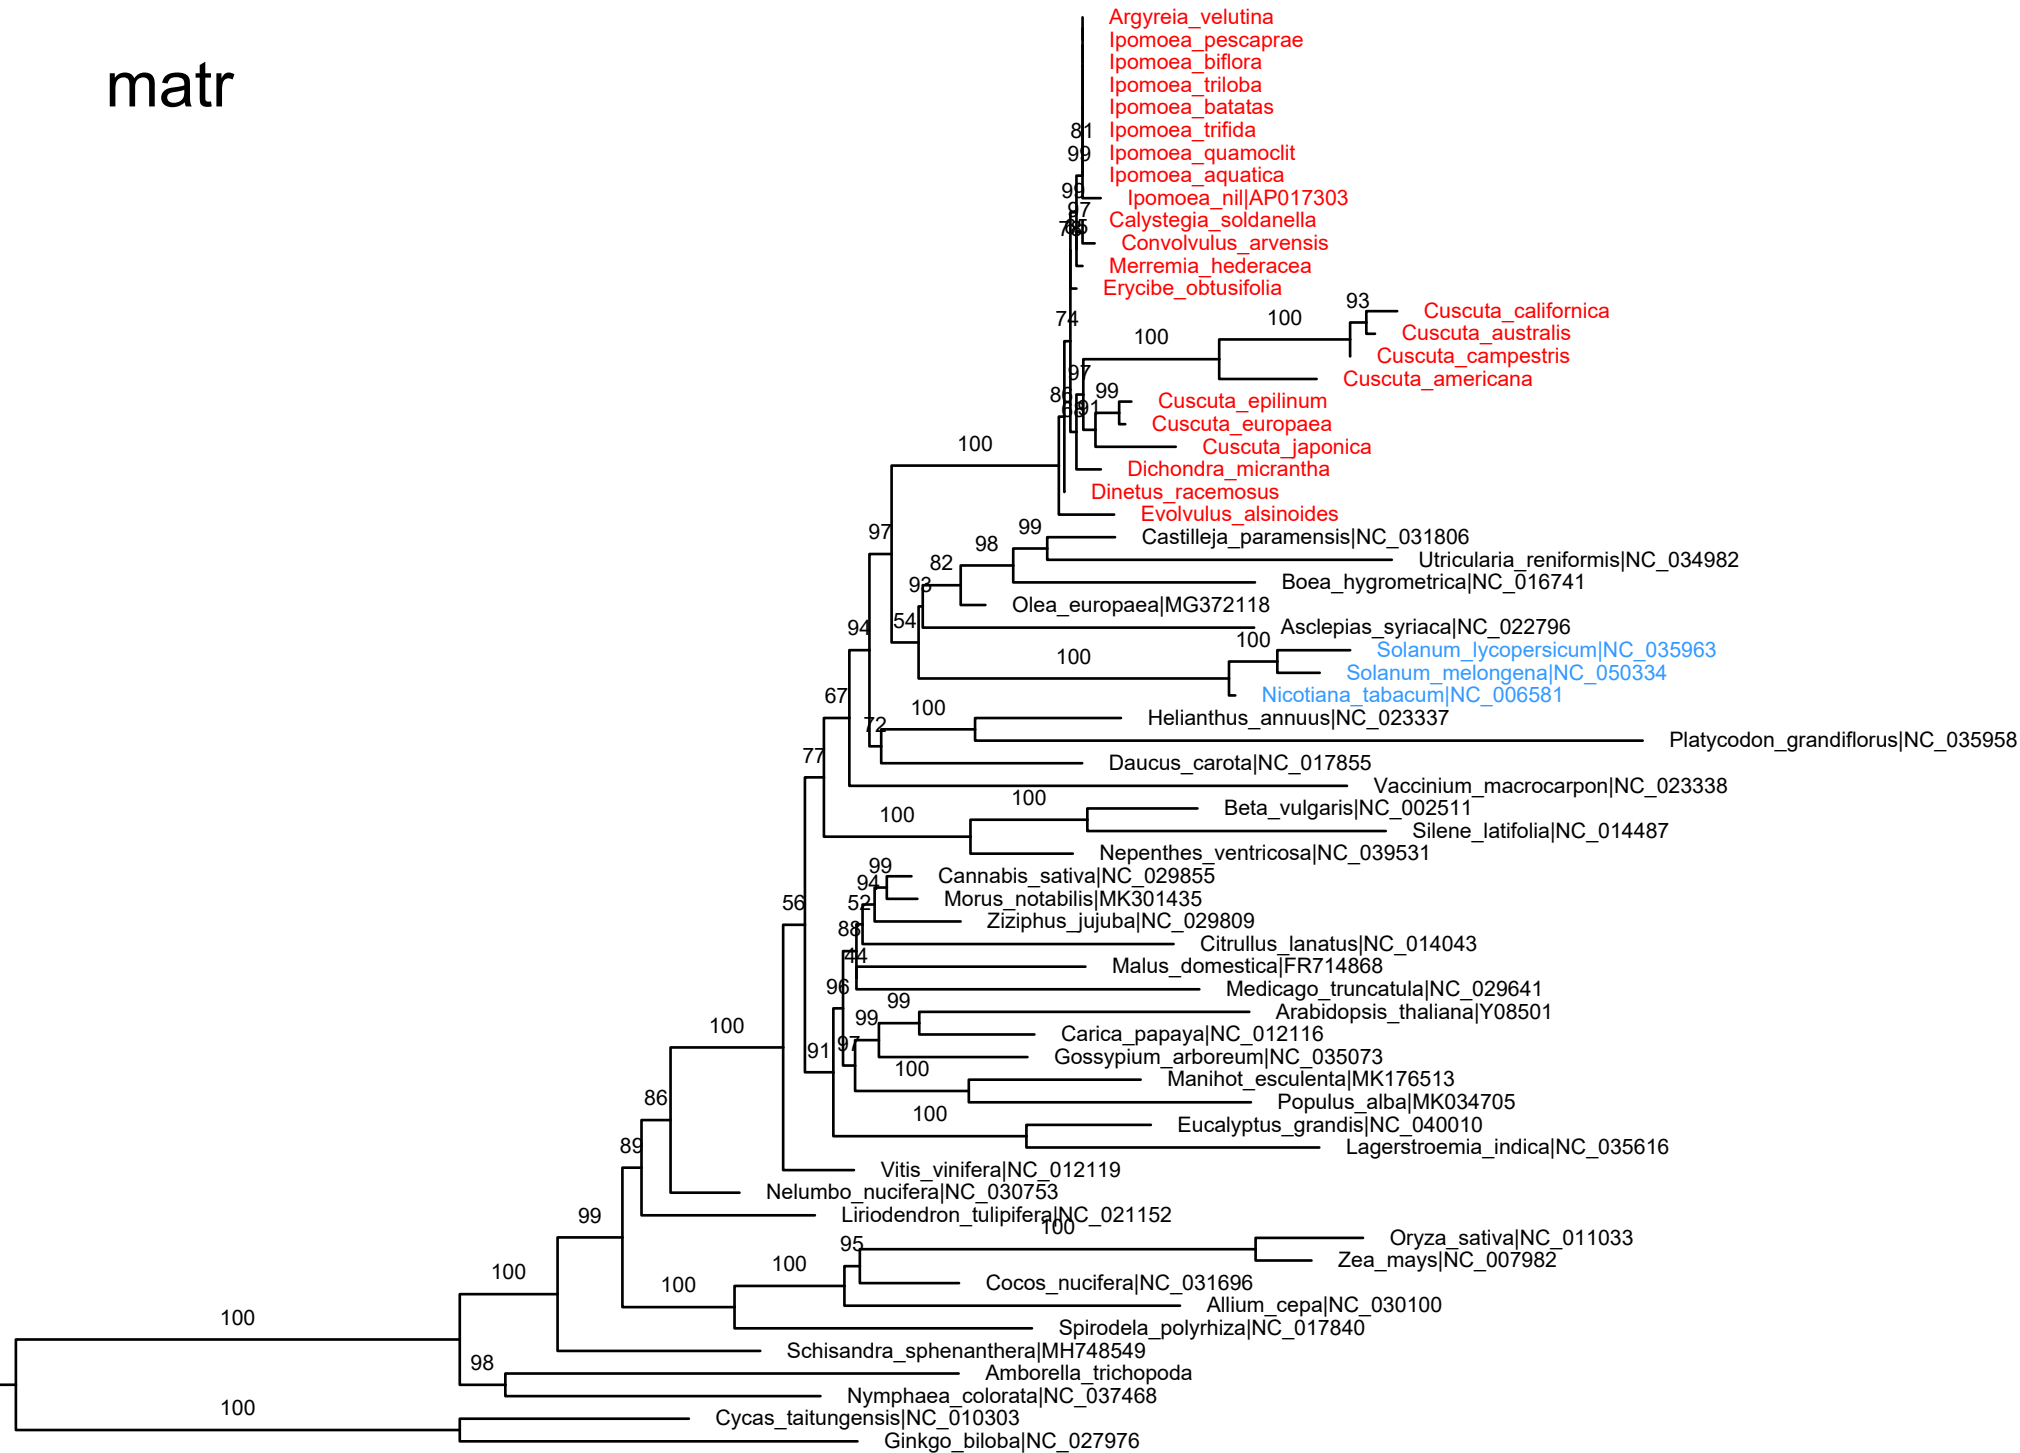

0.02

mttb

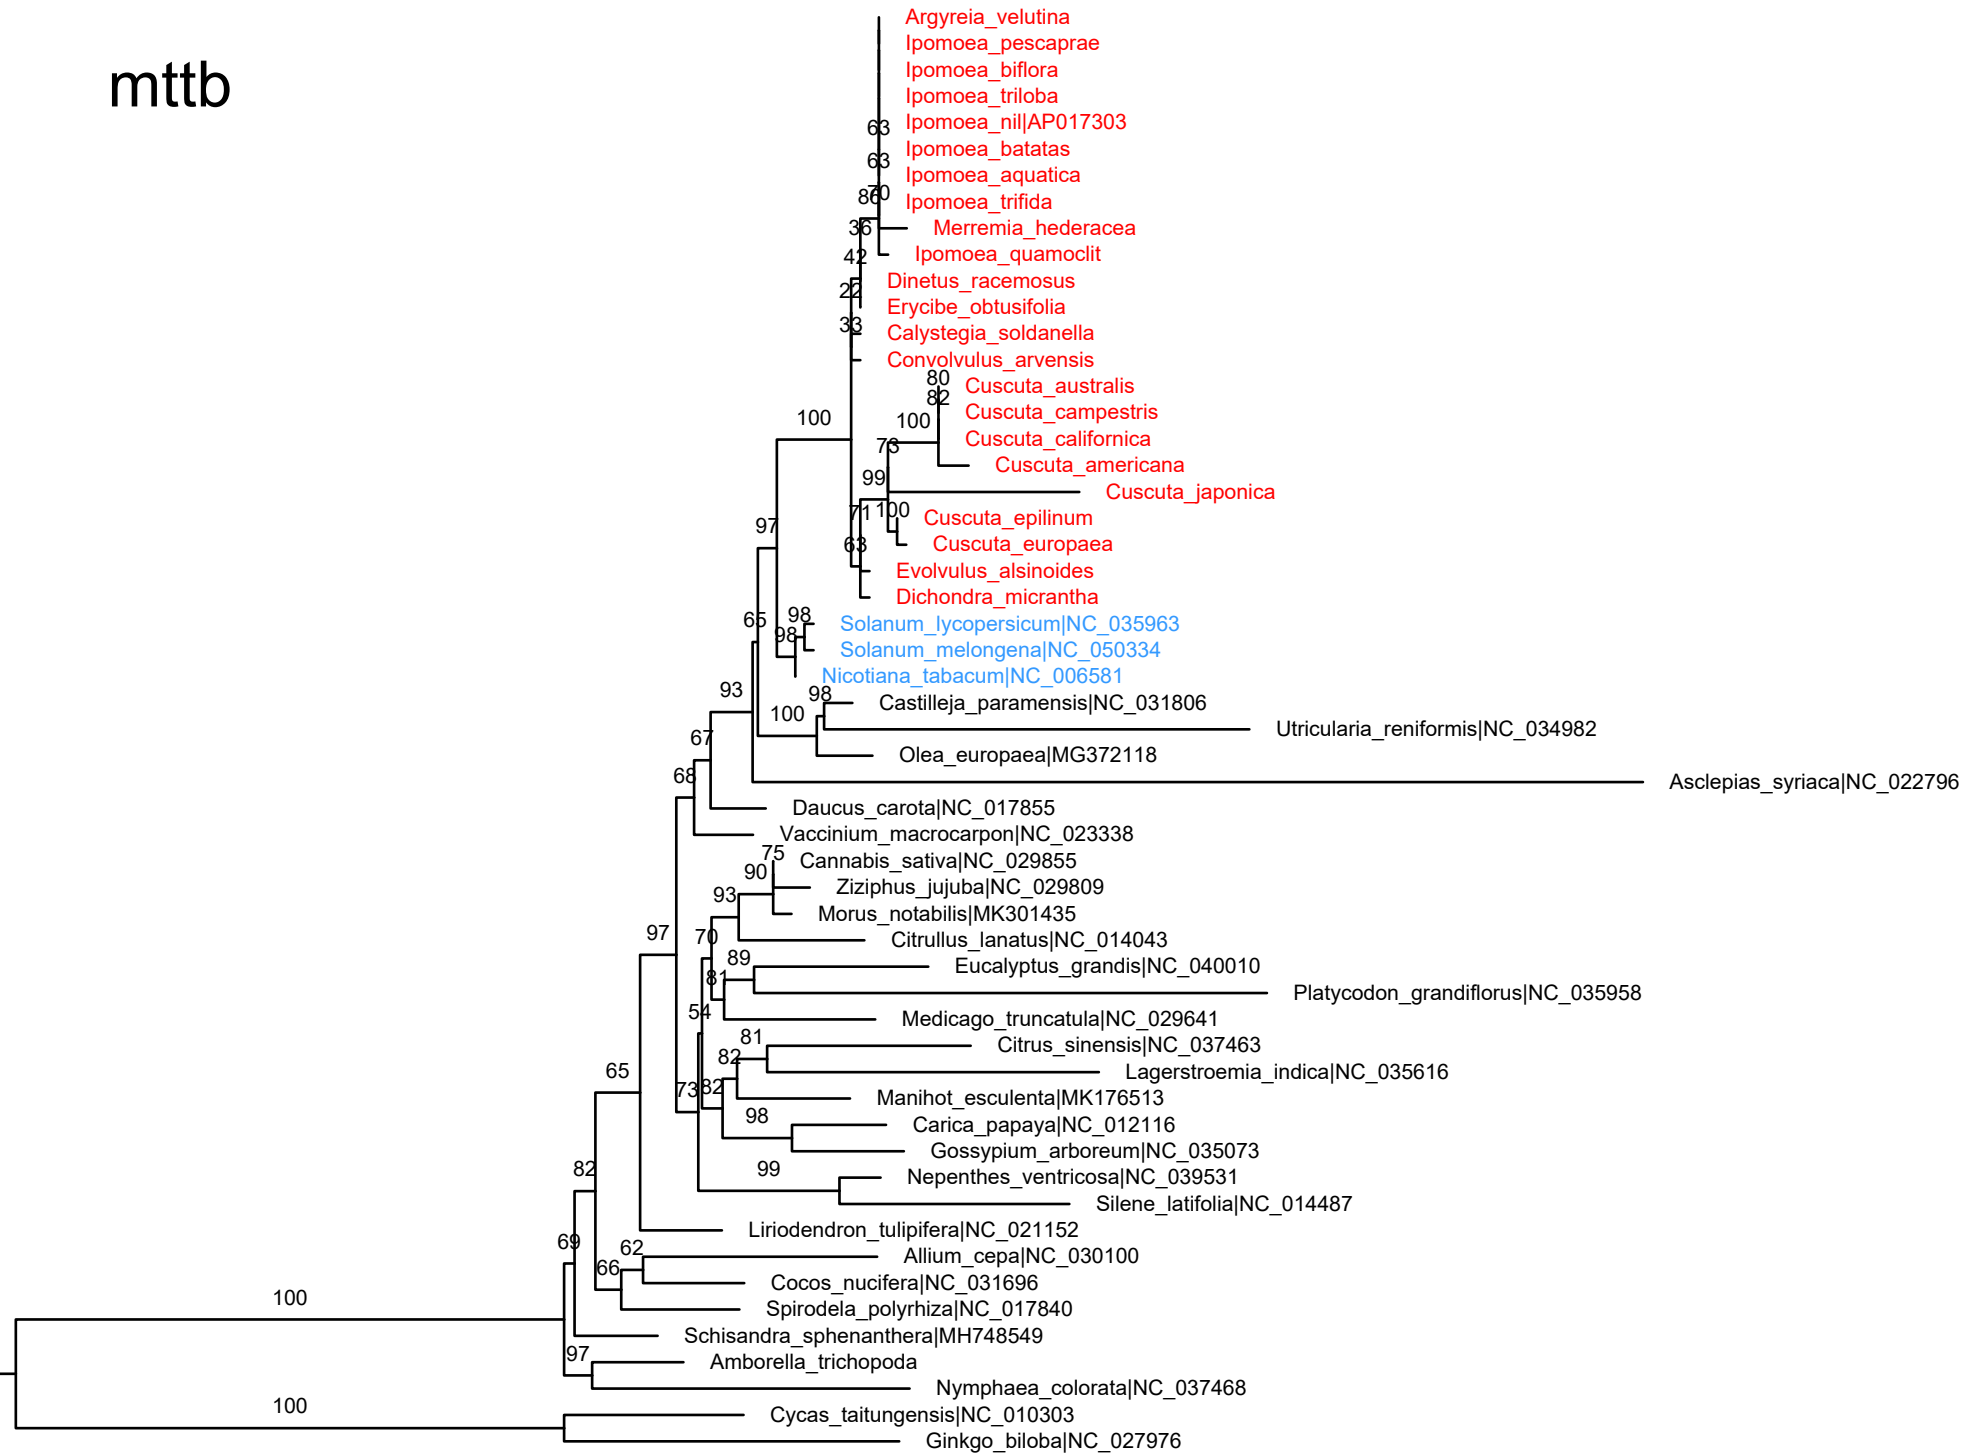

0.03



nad1e1

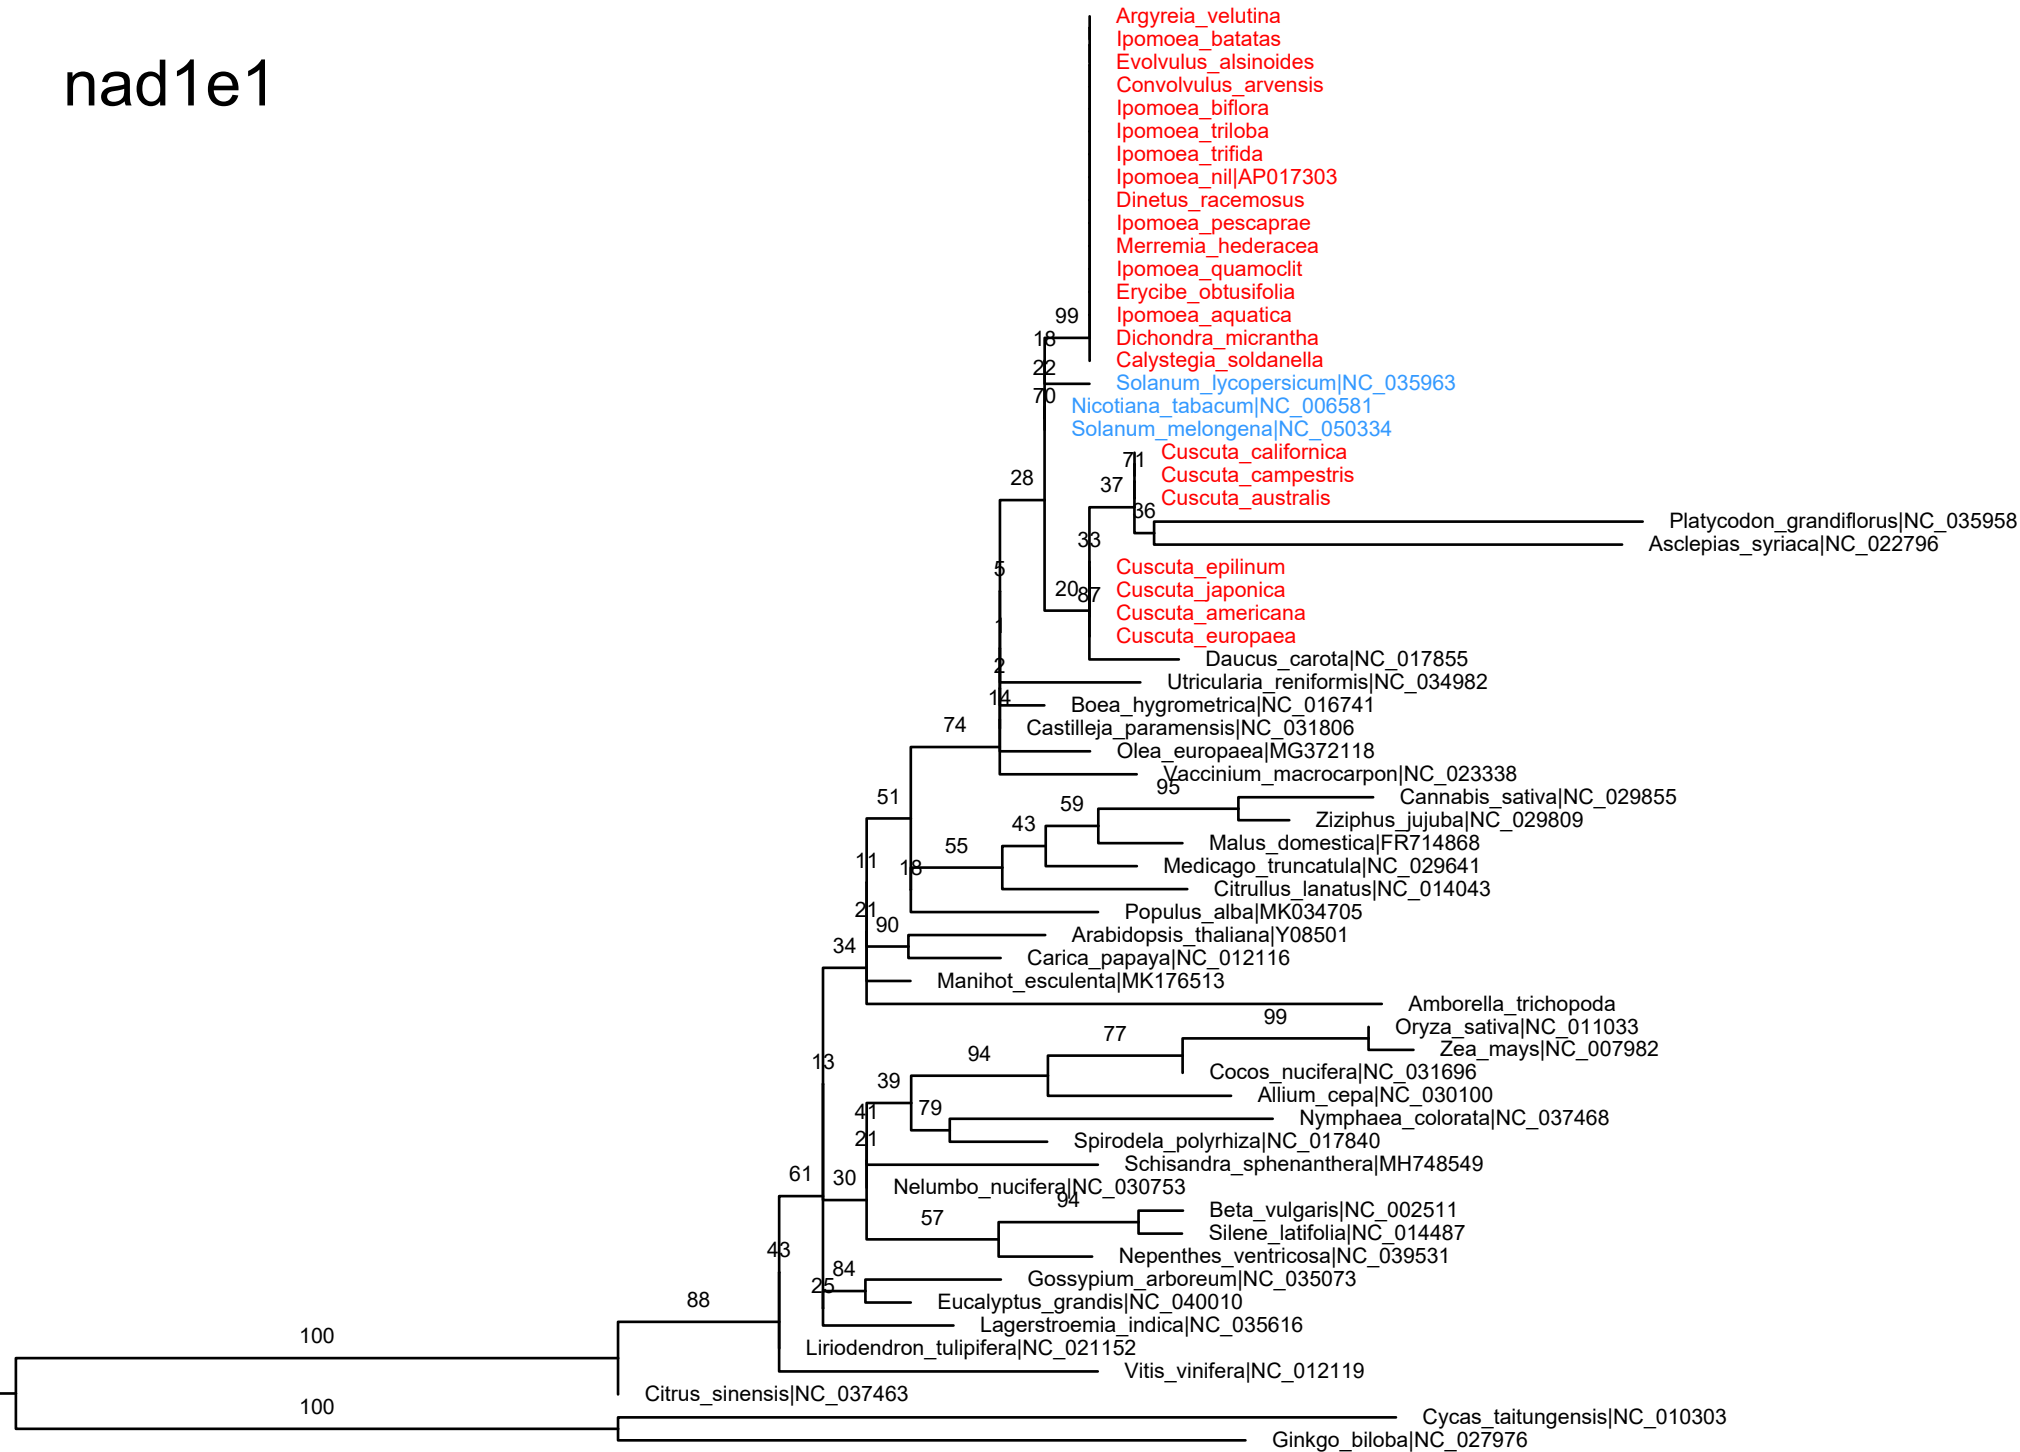

0.02

nad1e23

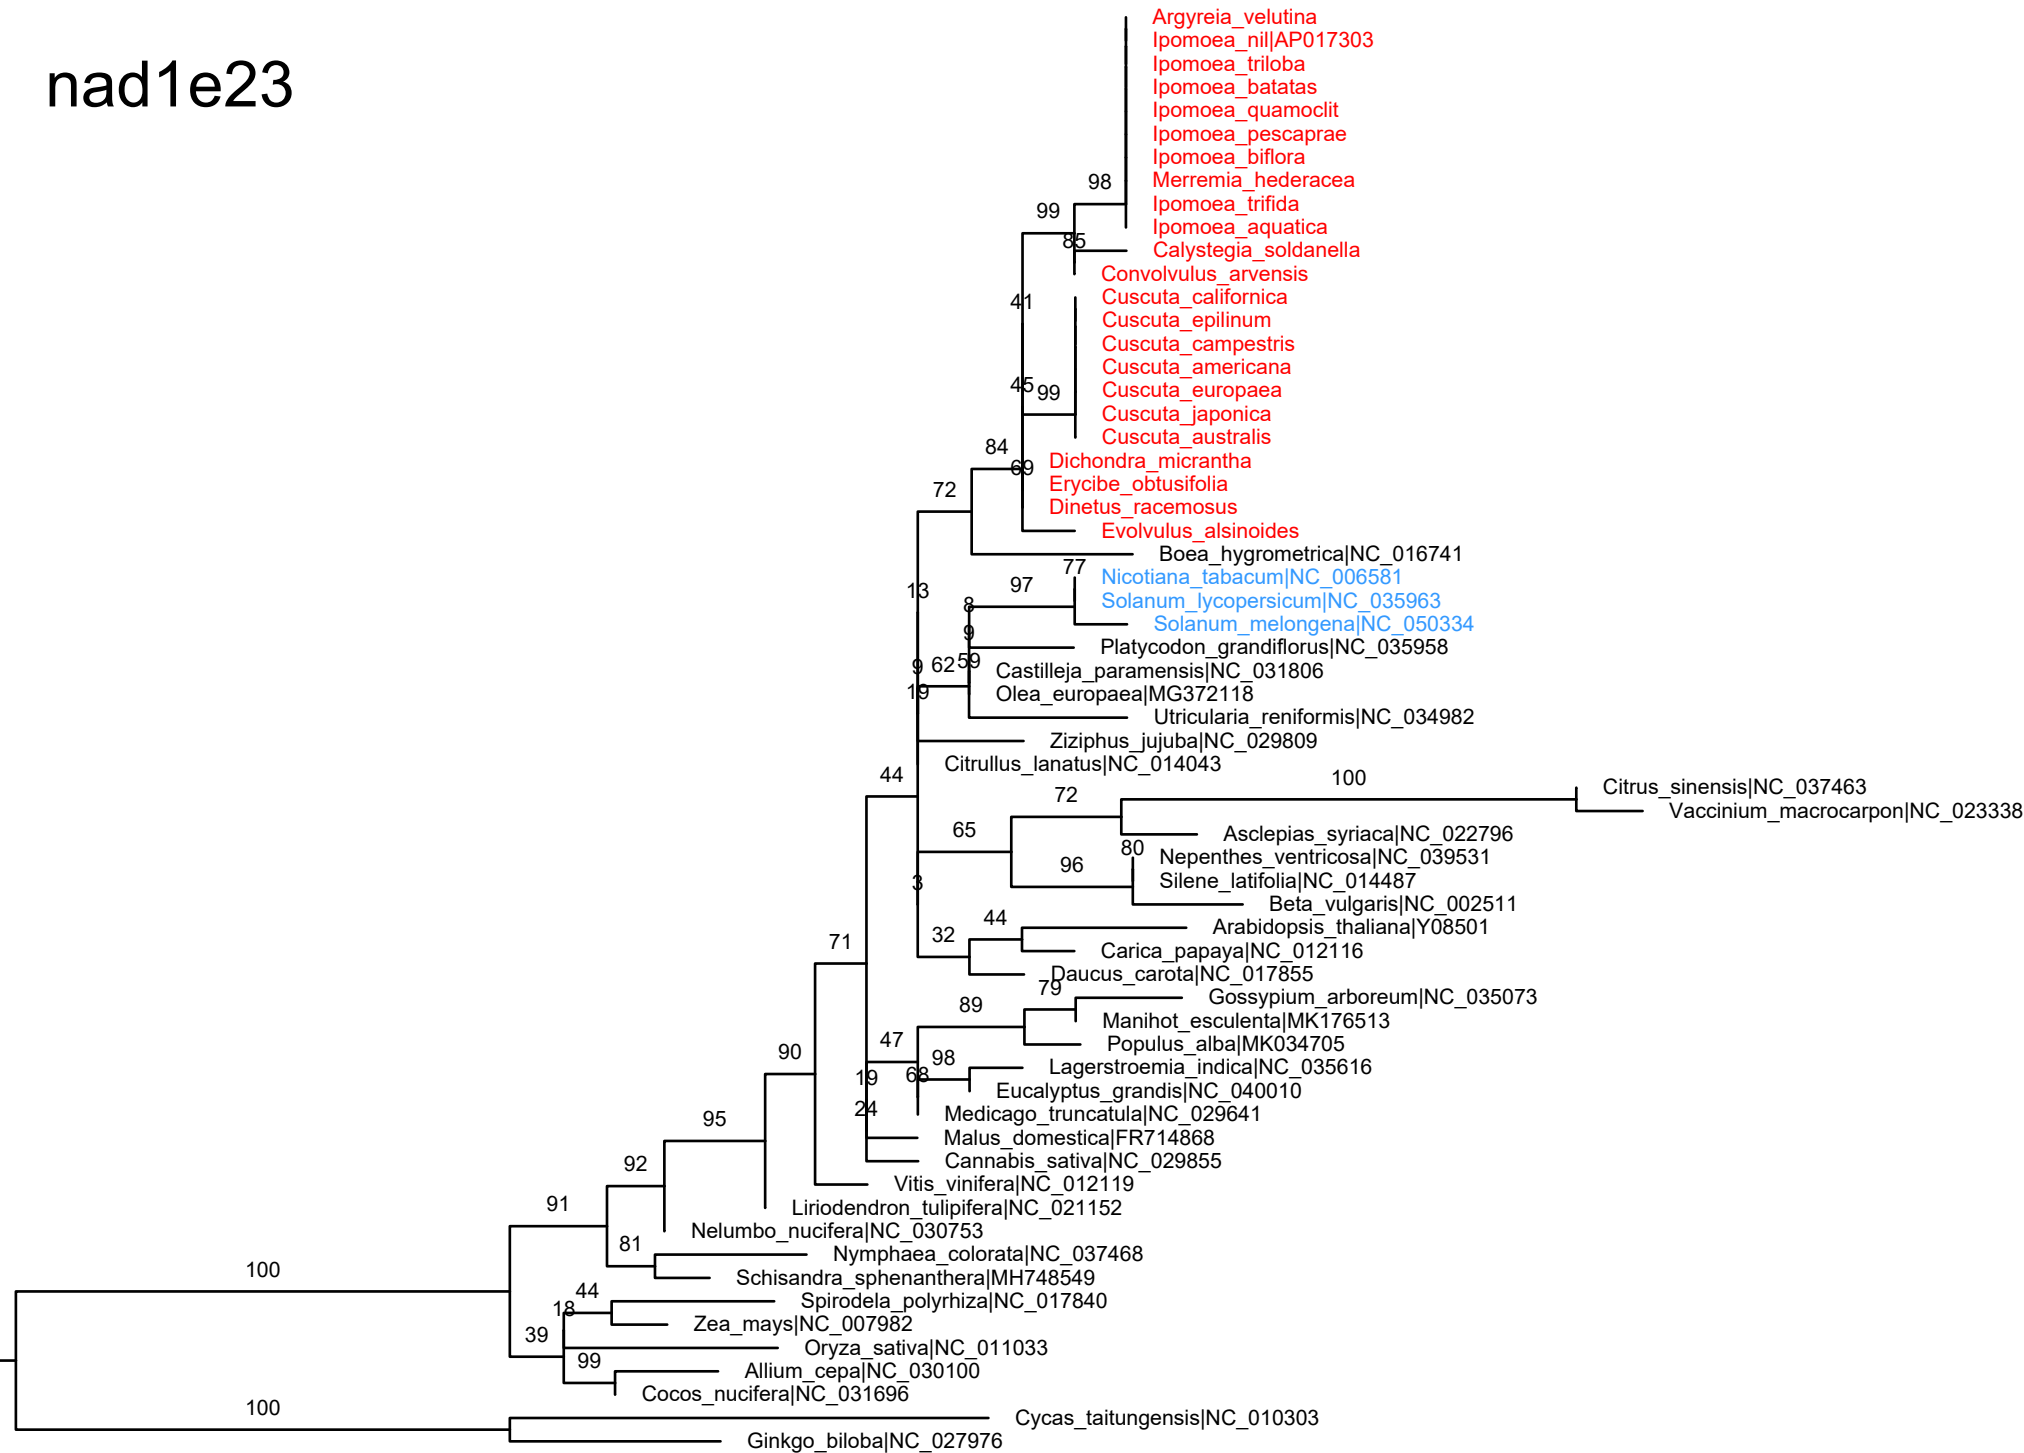

0.02

nad1e45

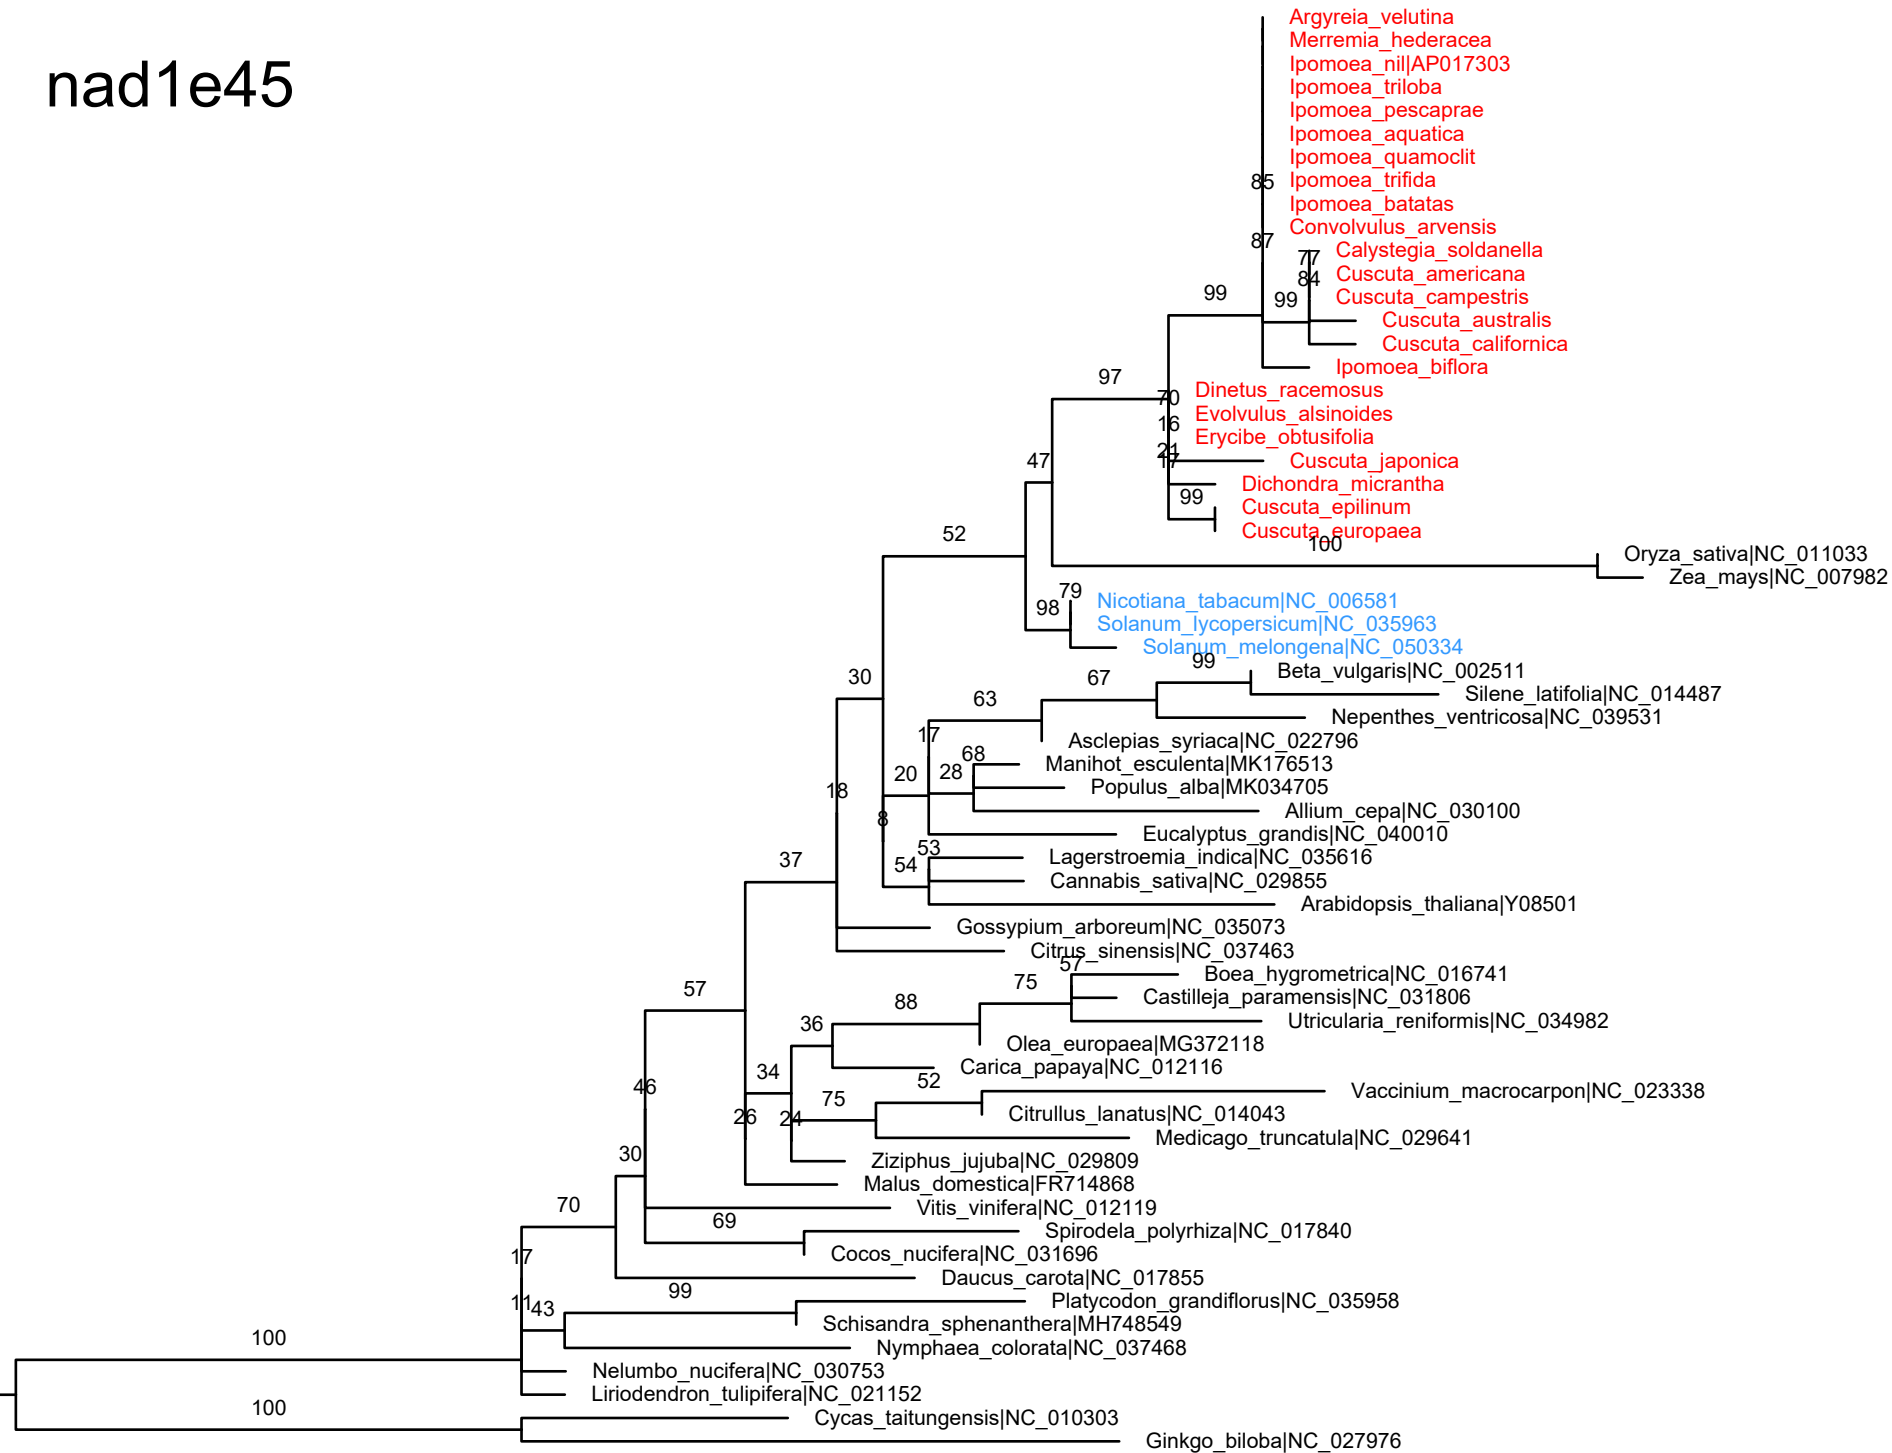

0.03

nad2e12

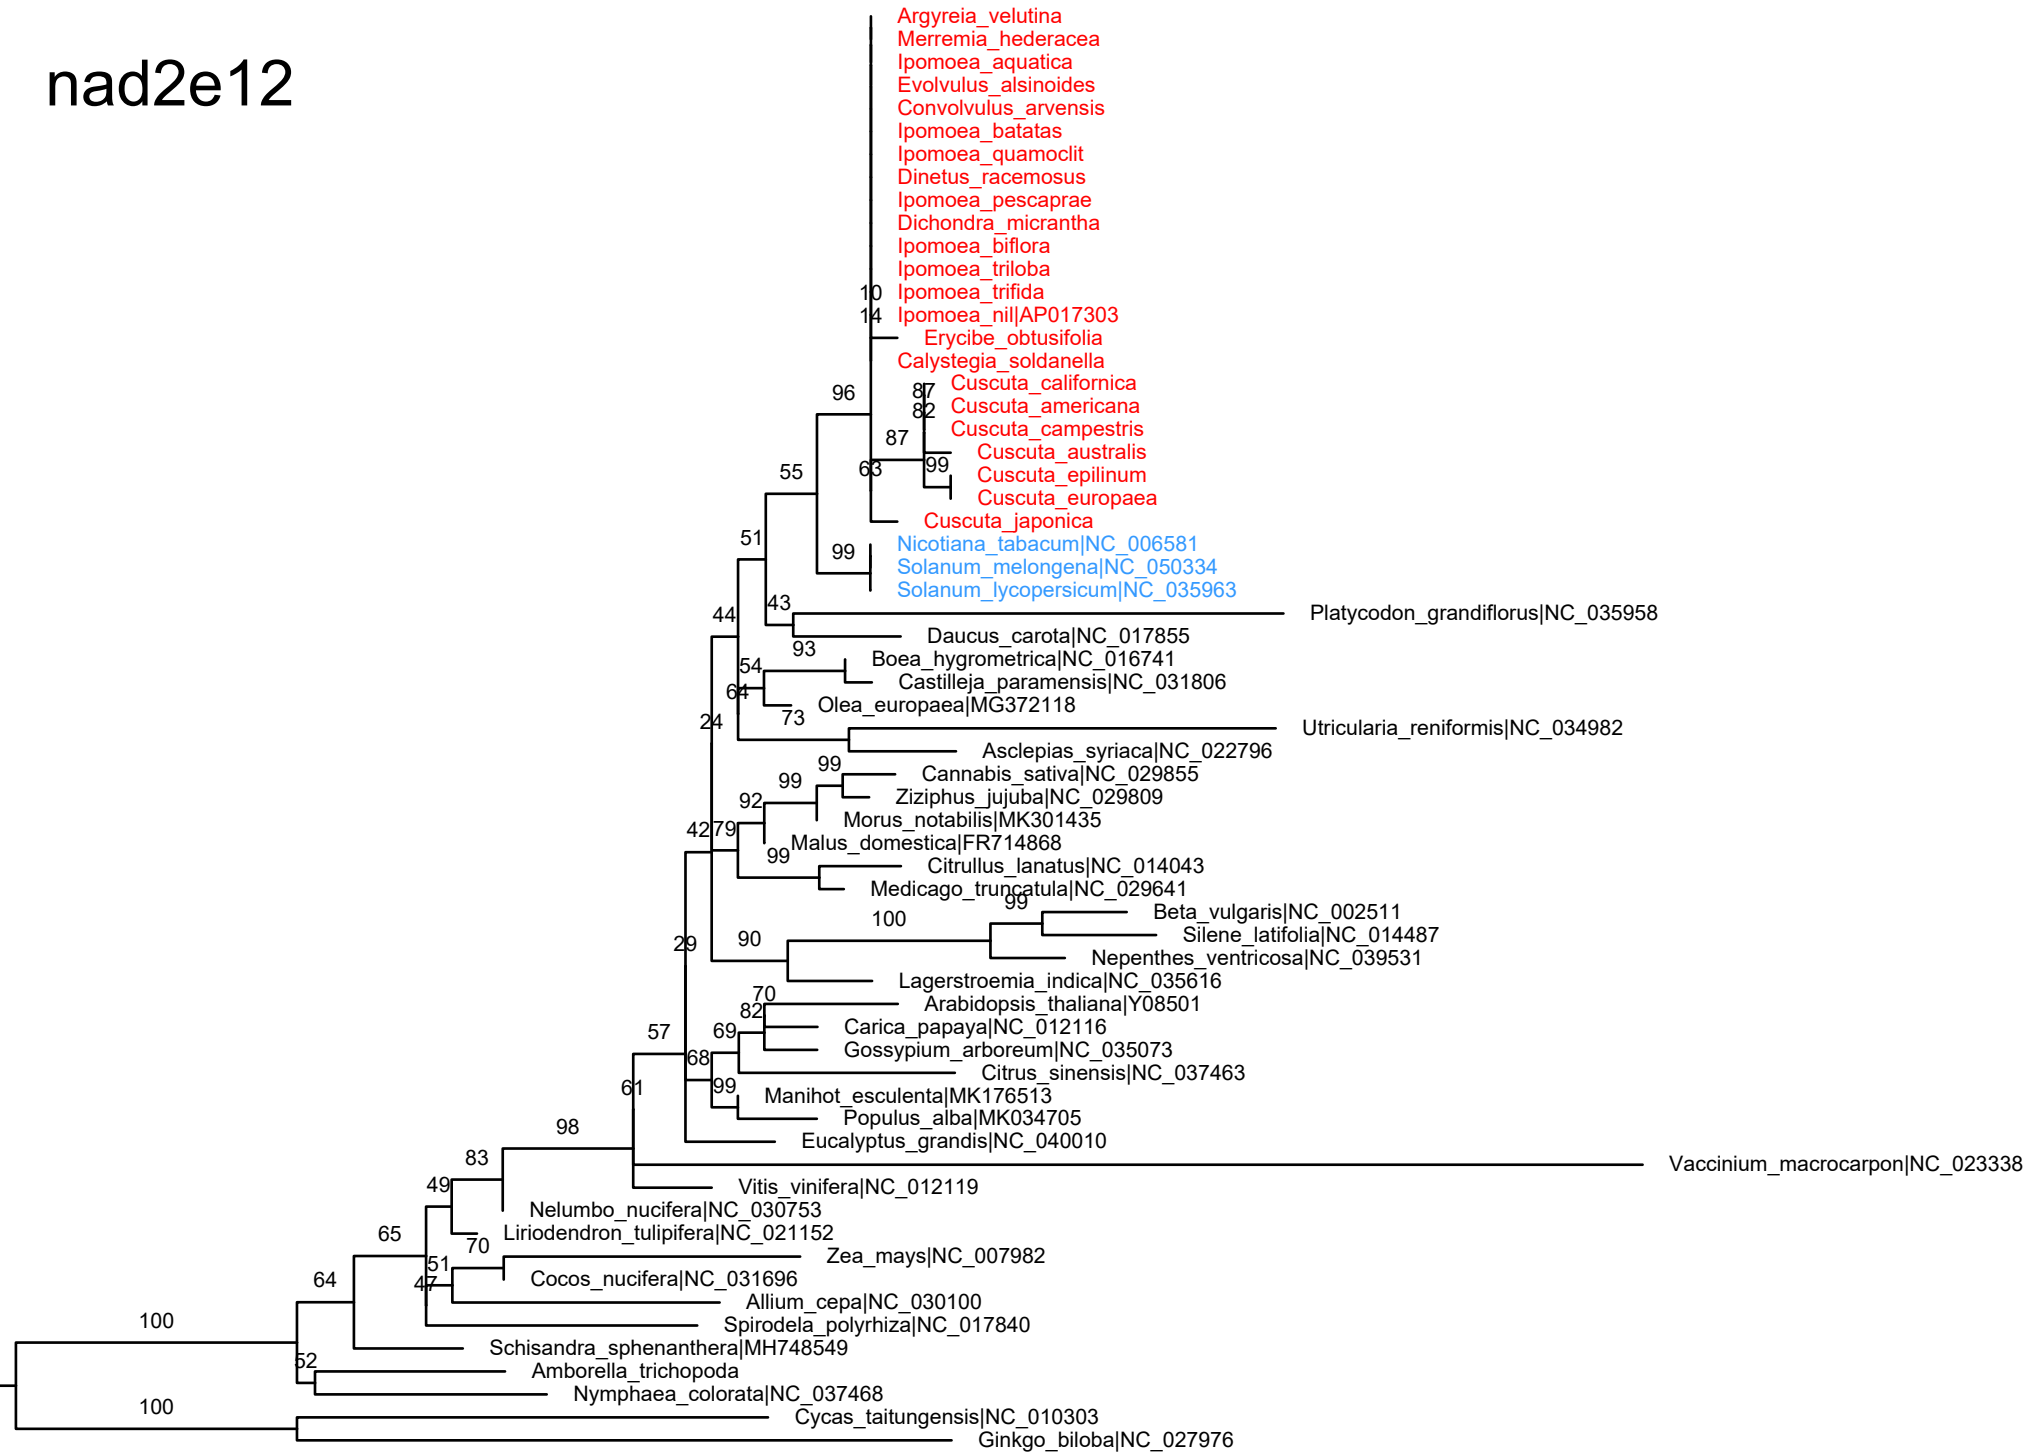

0.02

nad2e345

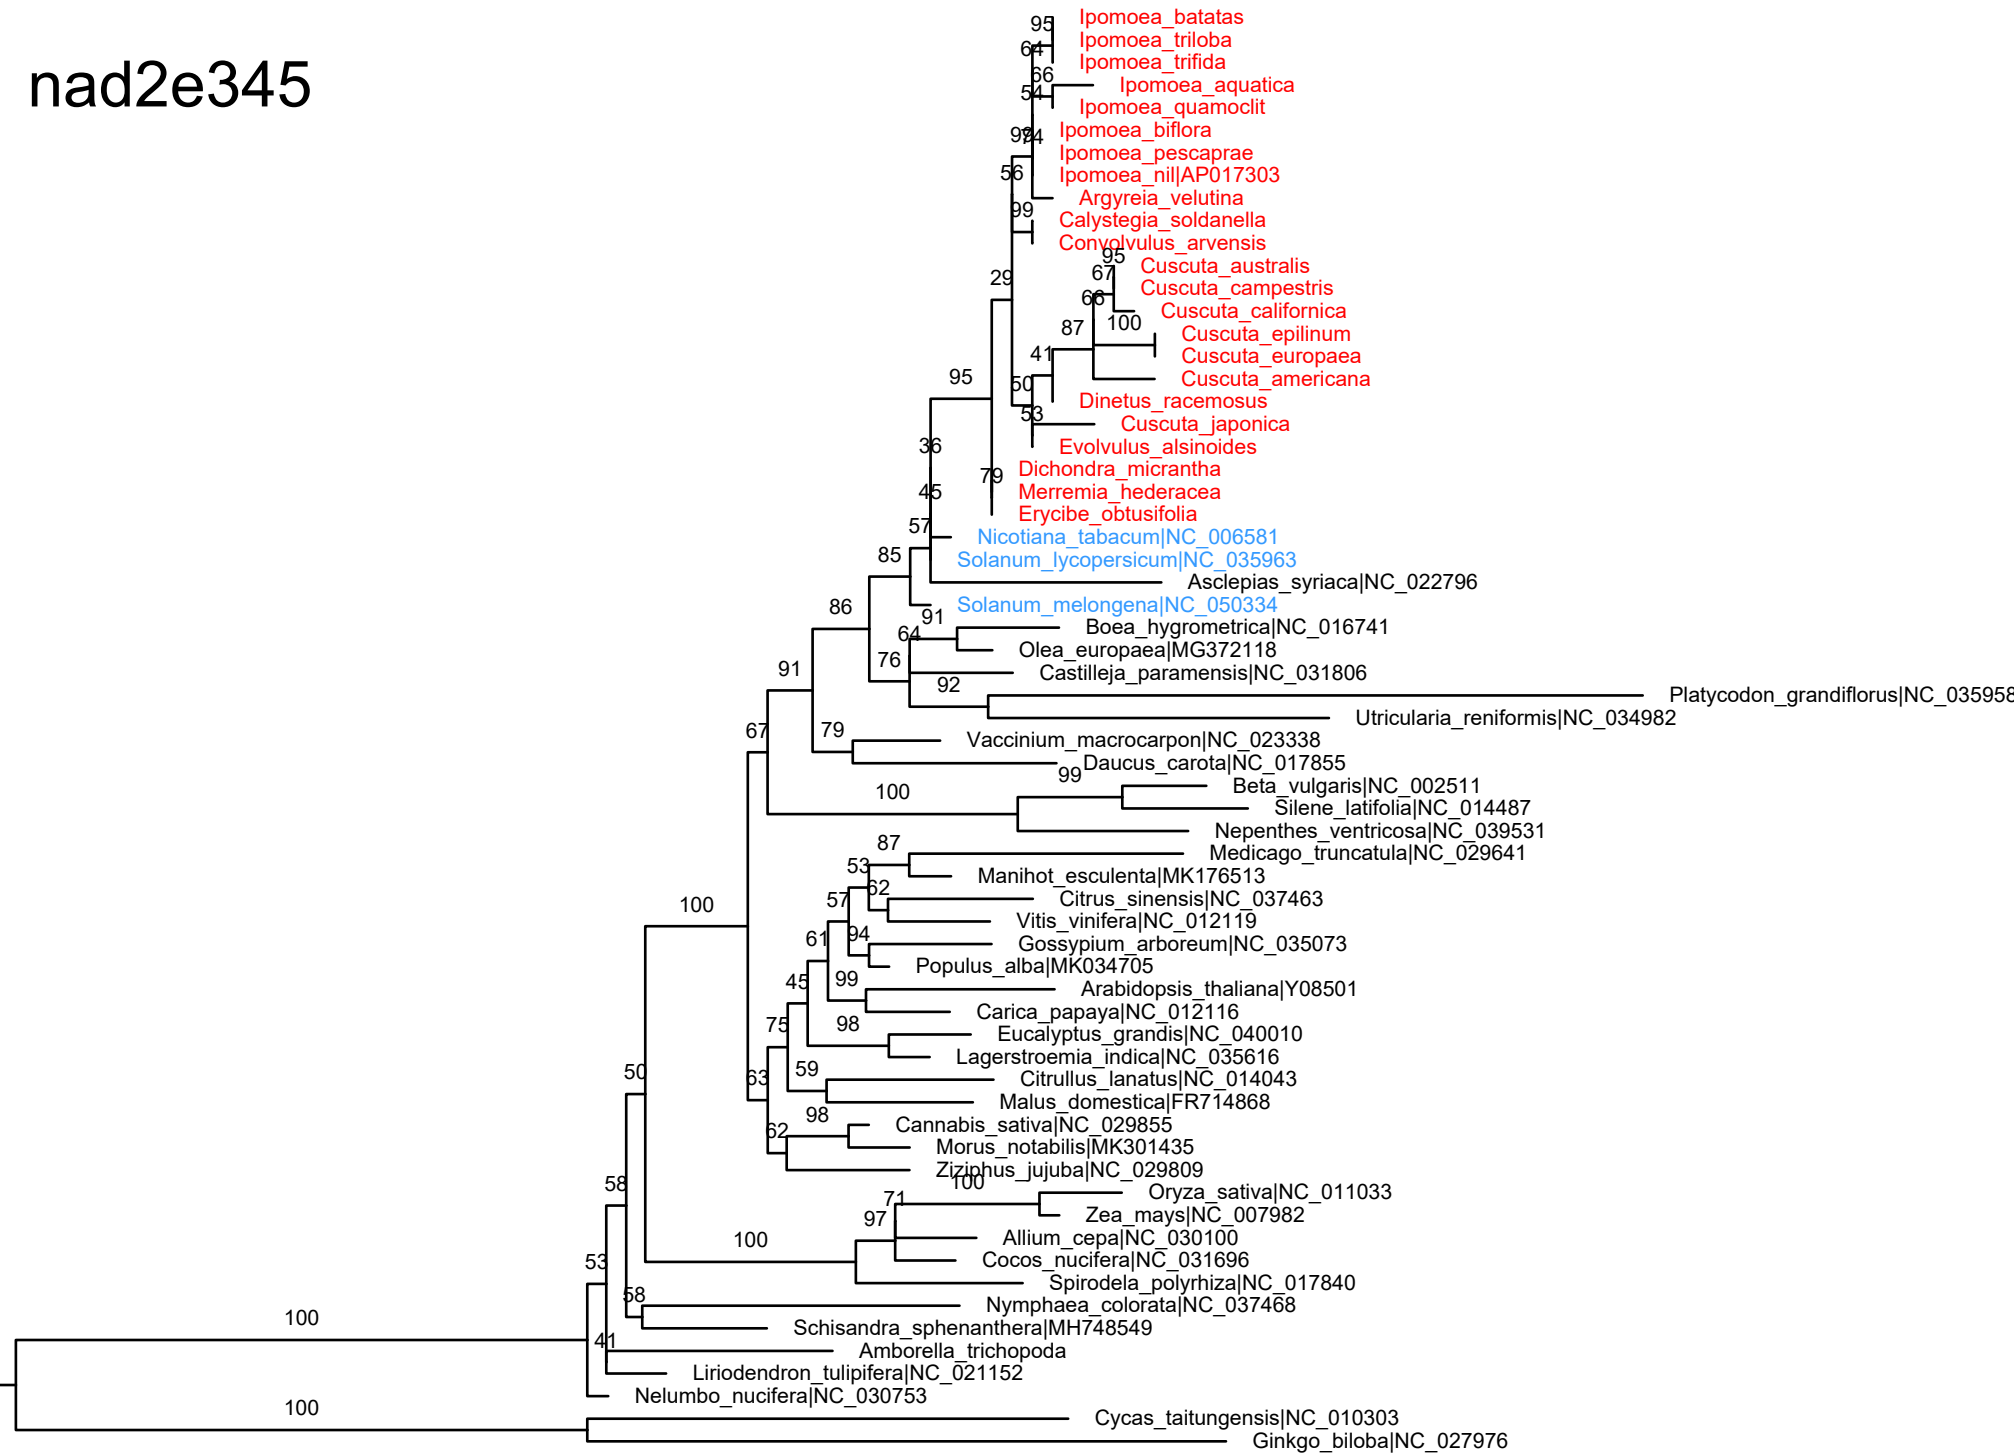

0.02

nad3

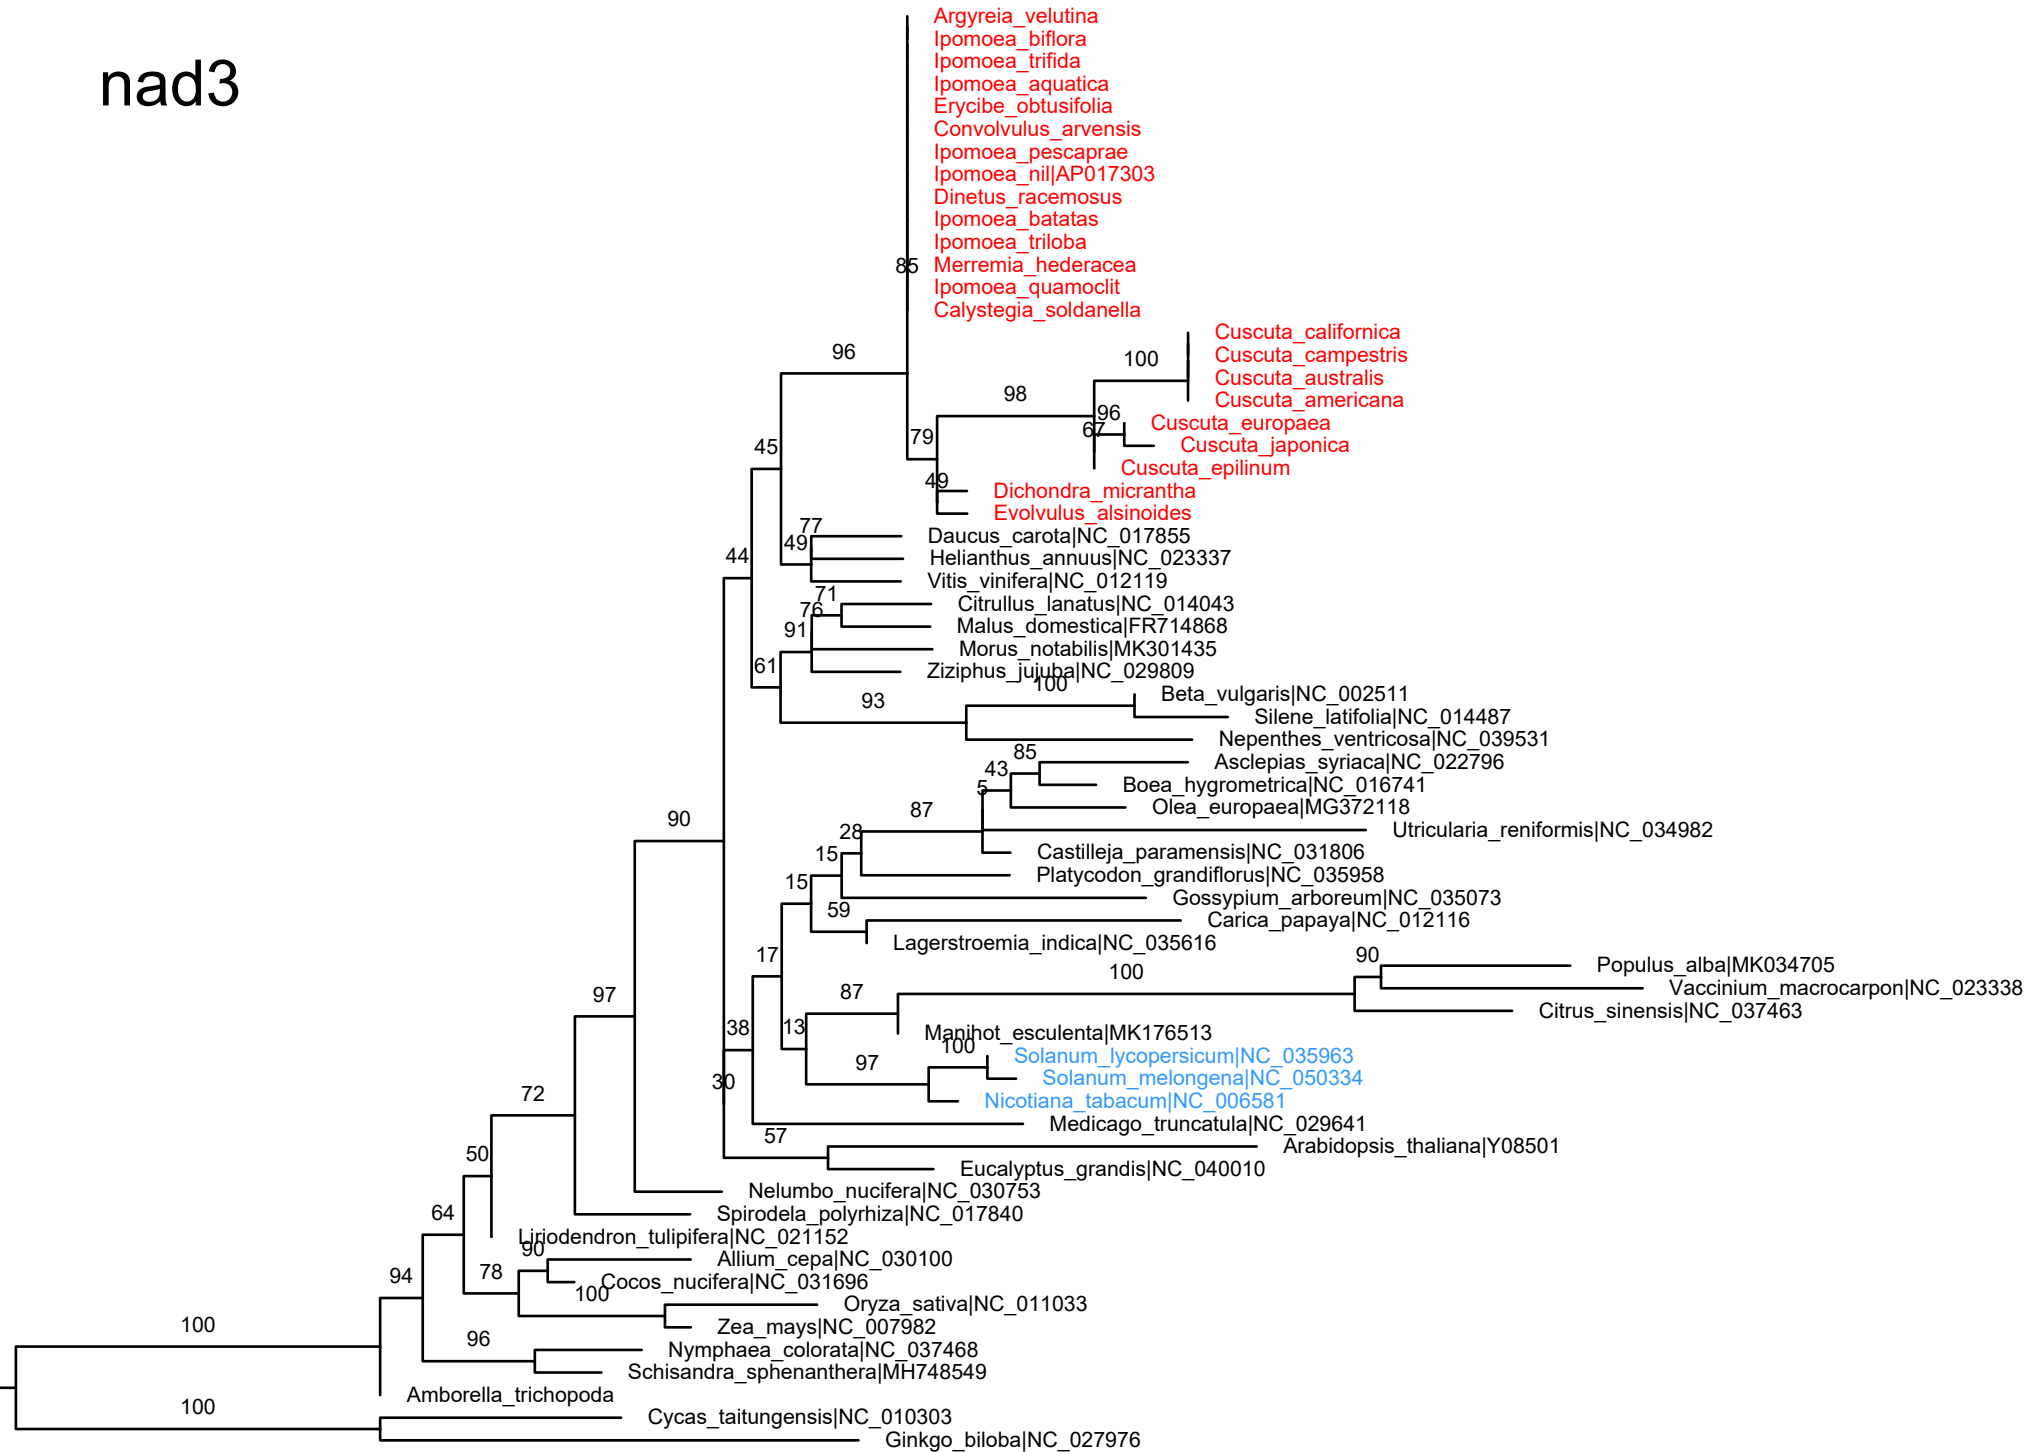

0.03

nad4

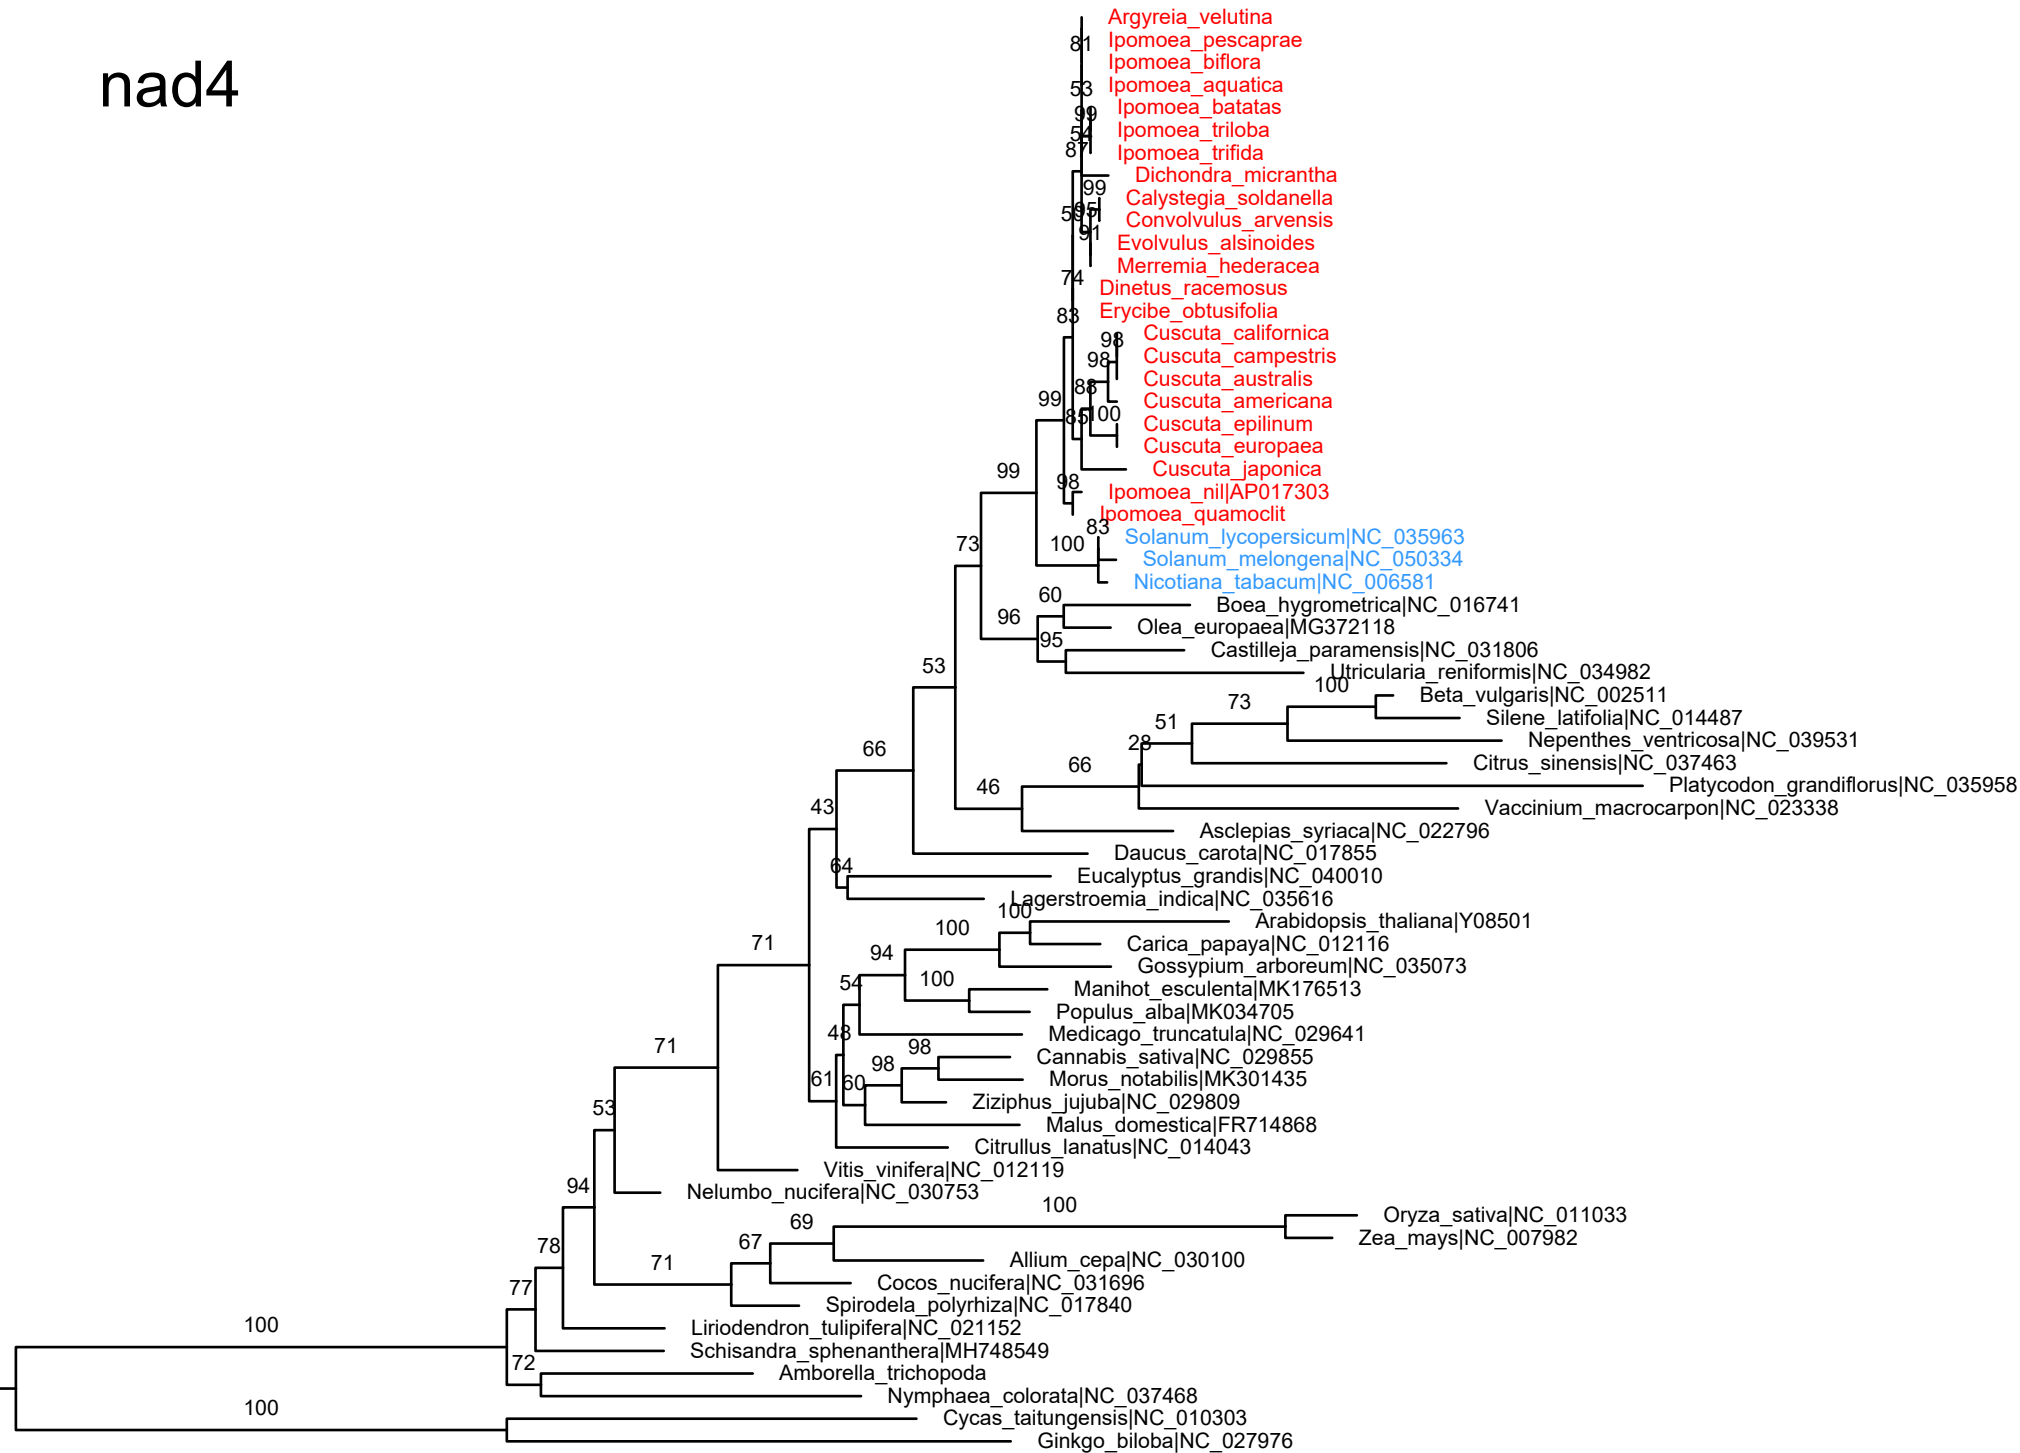

0.02

# nad4l

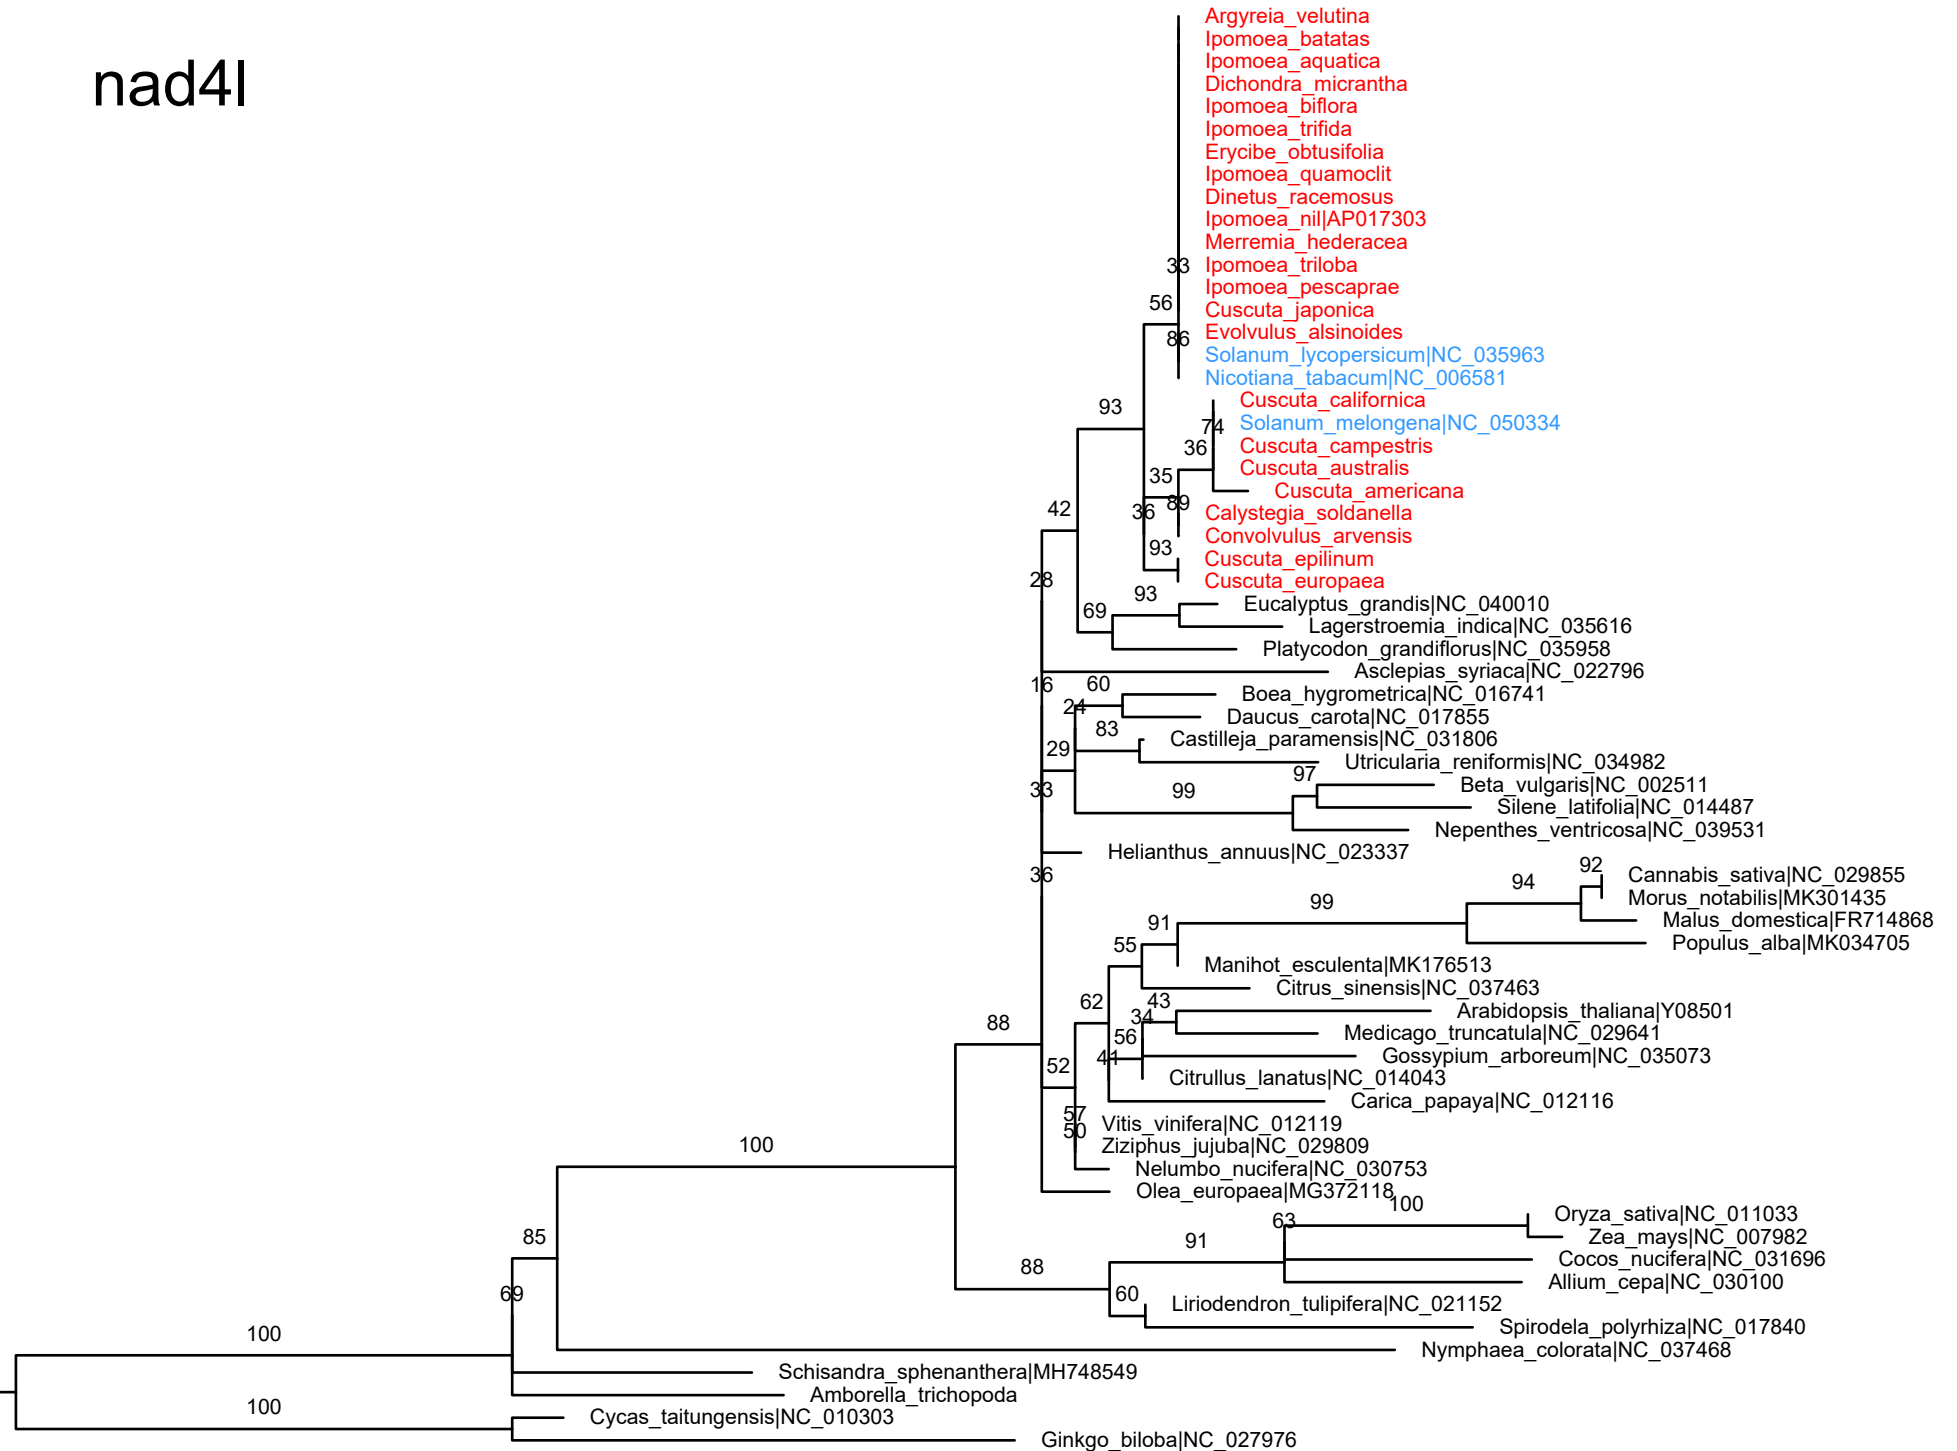

0.03



nad5e12

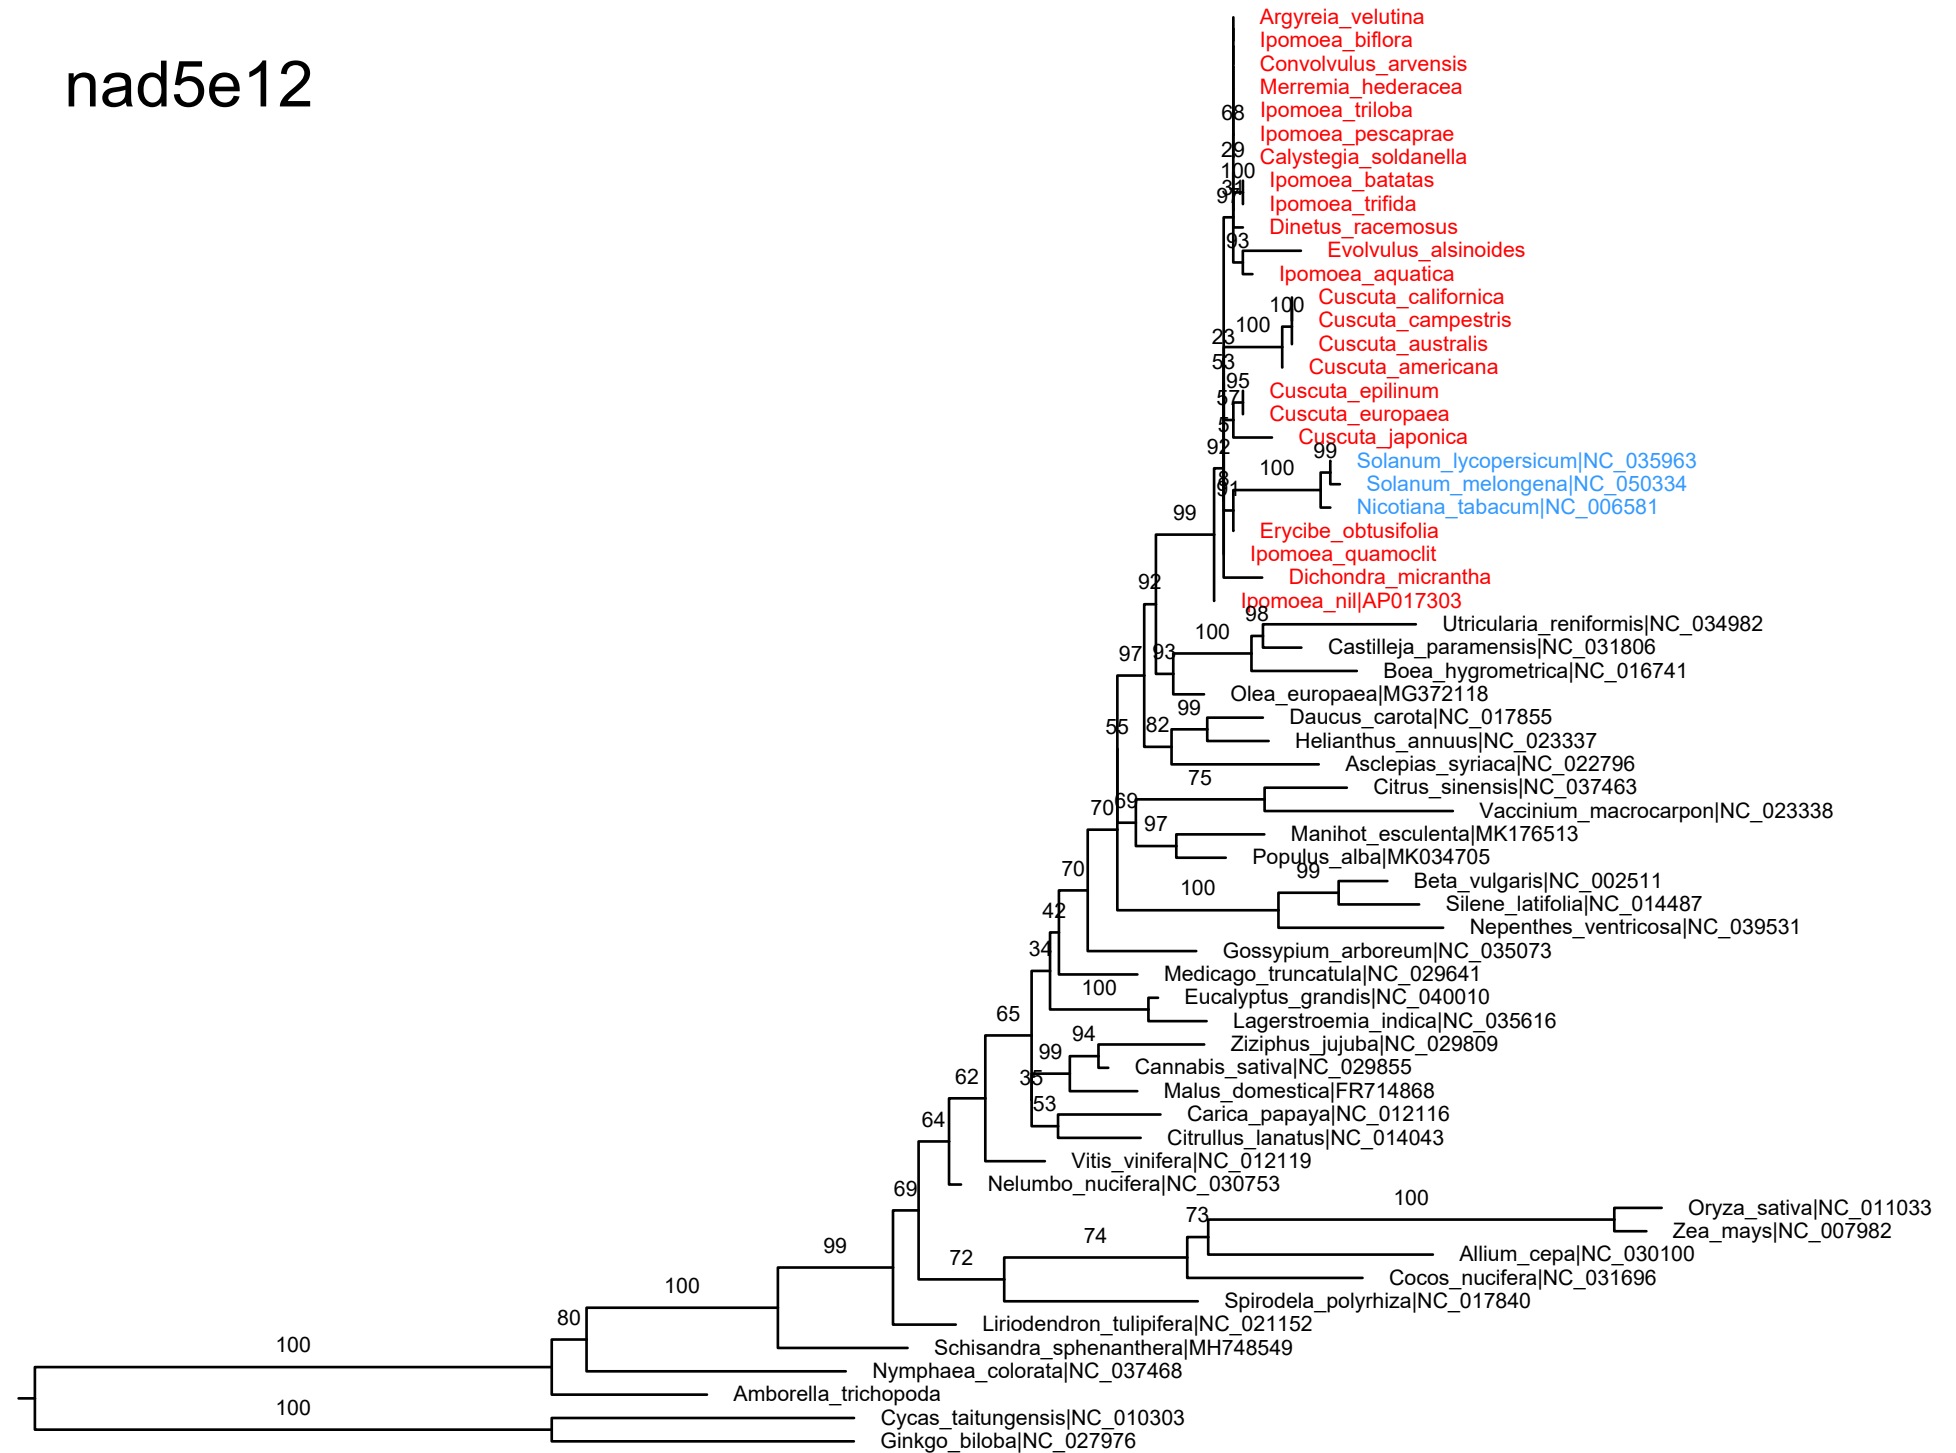

0.02

nad5e45

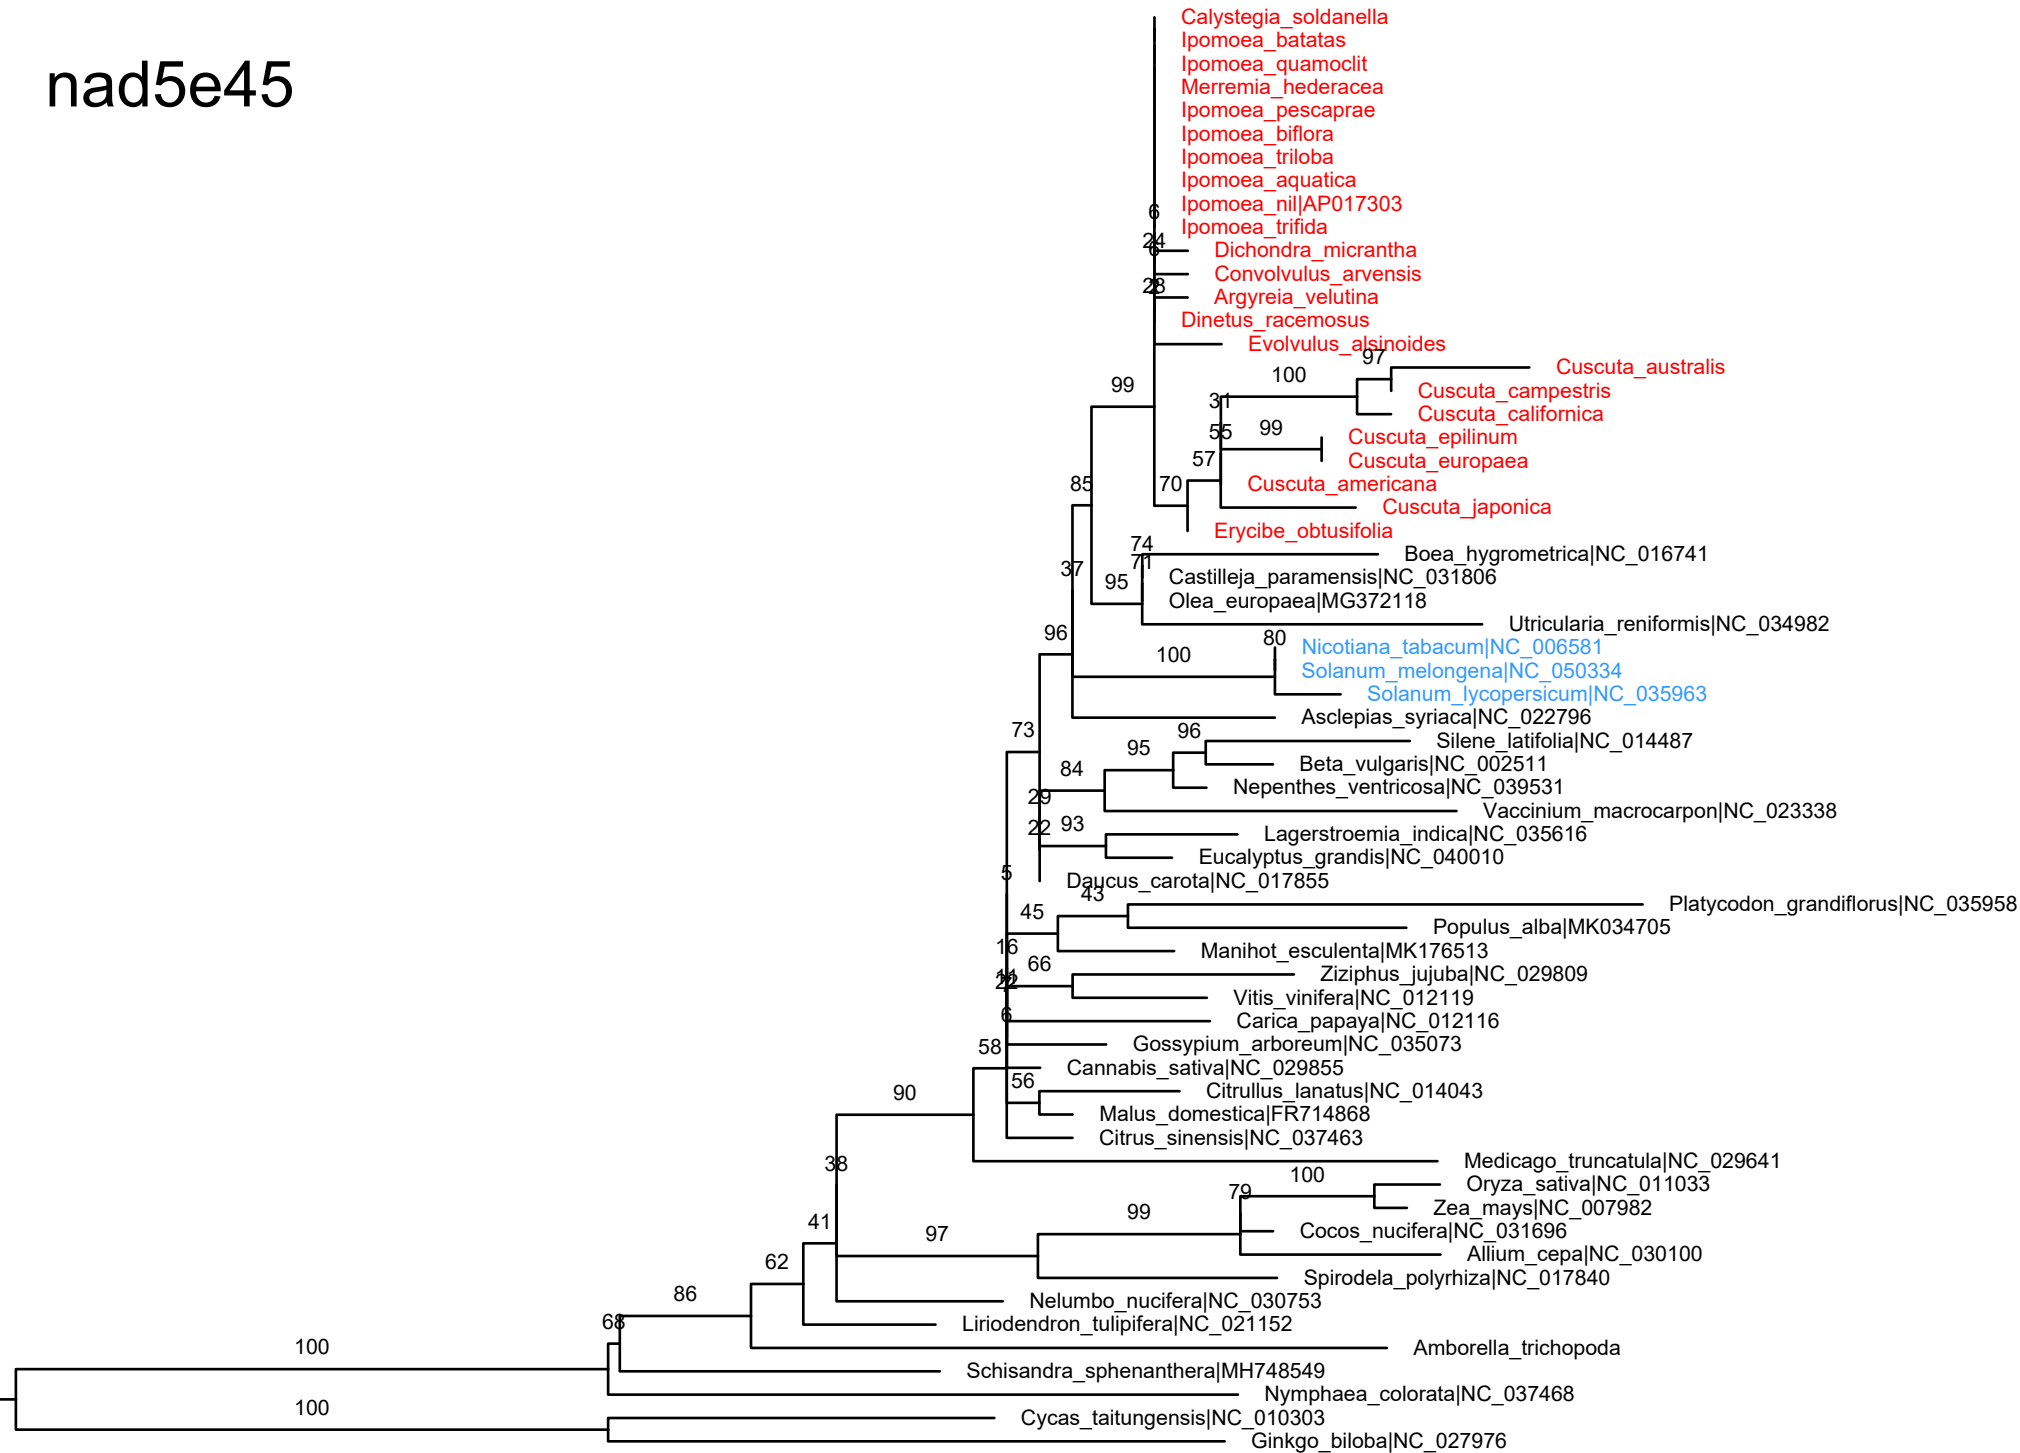

0.02

nad6

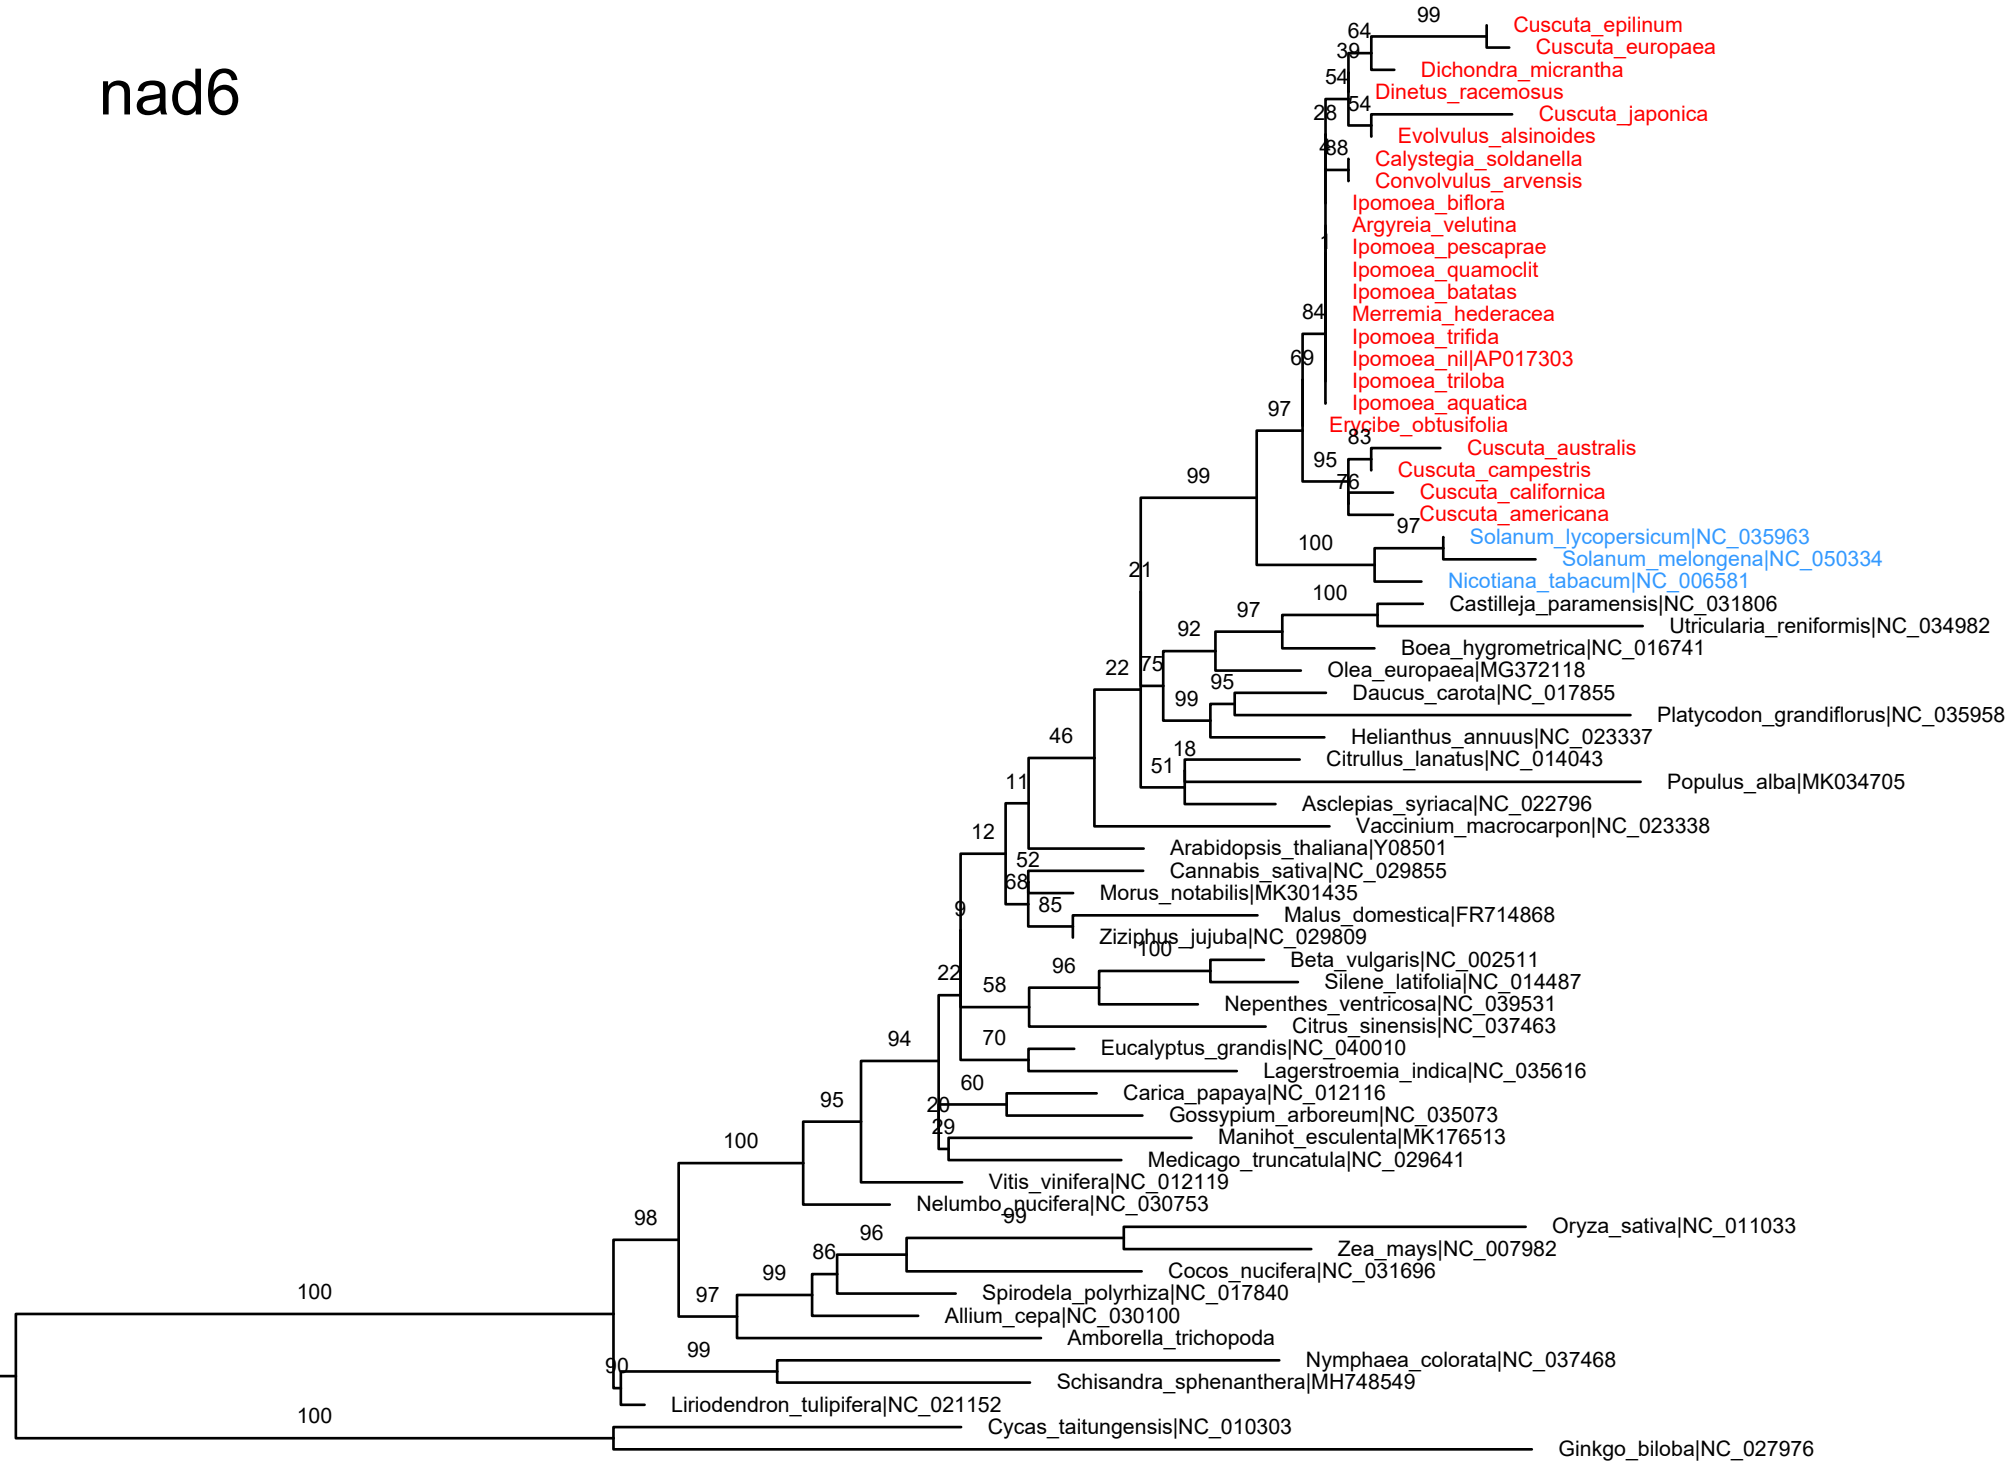

0.03

nad7

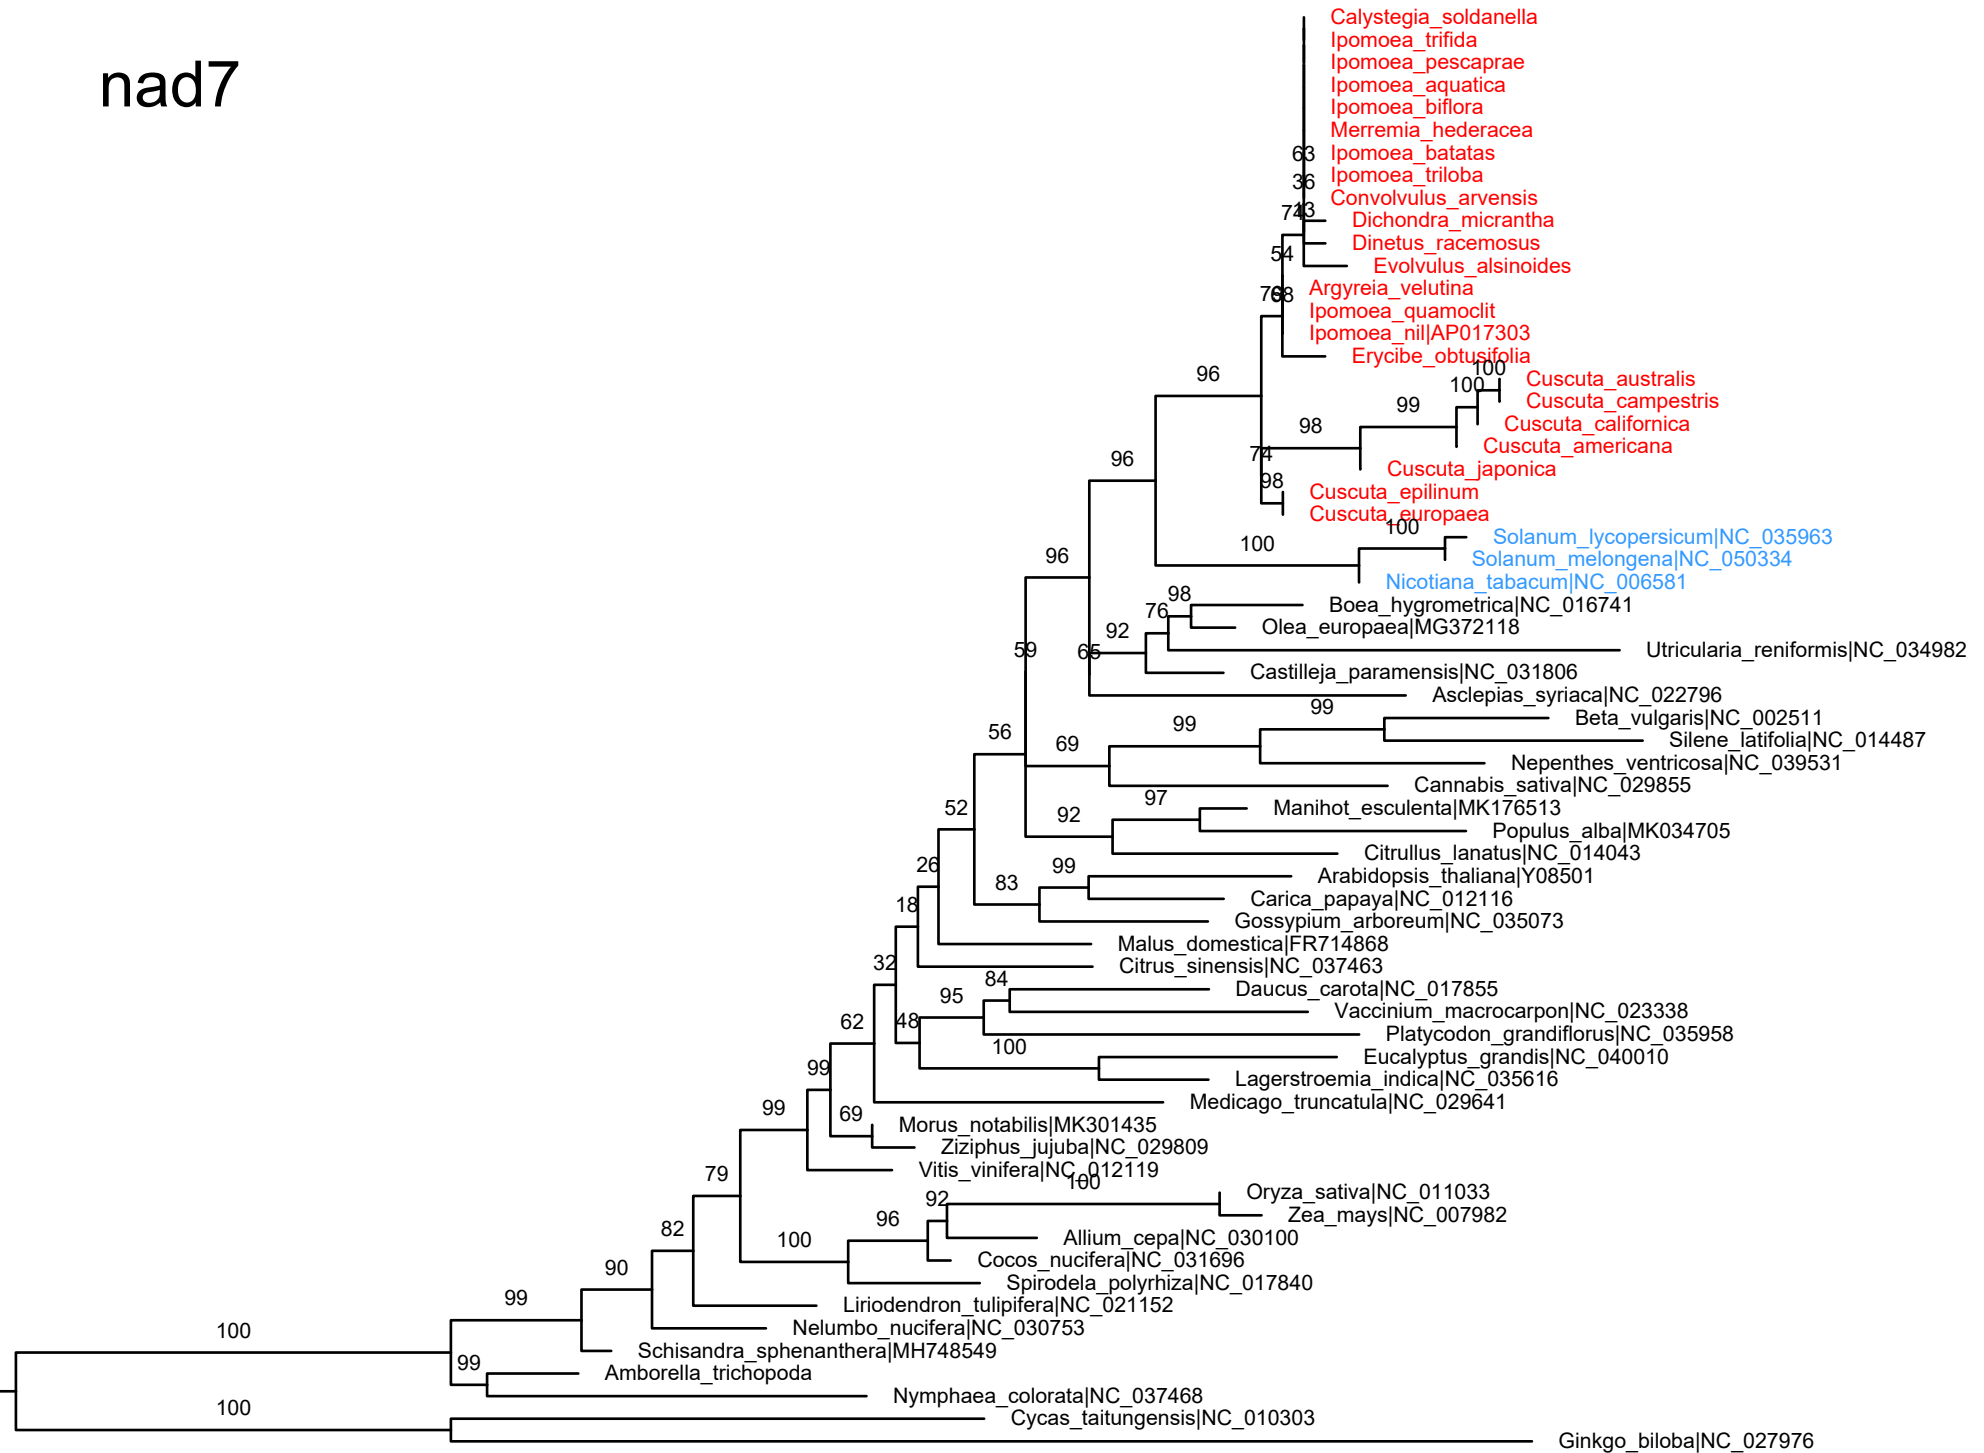

0.02

nad9

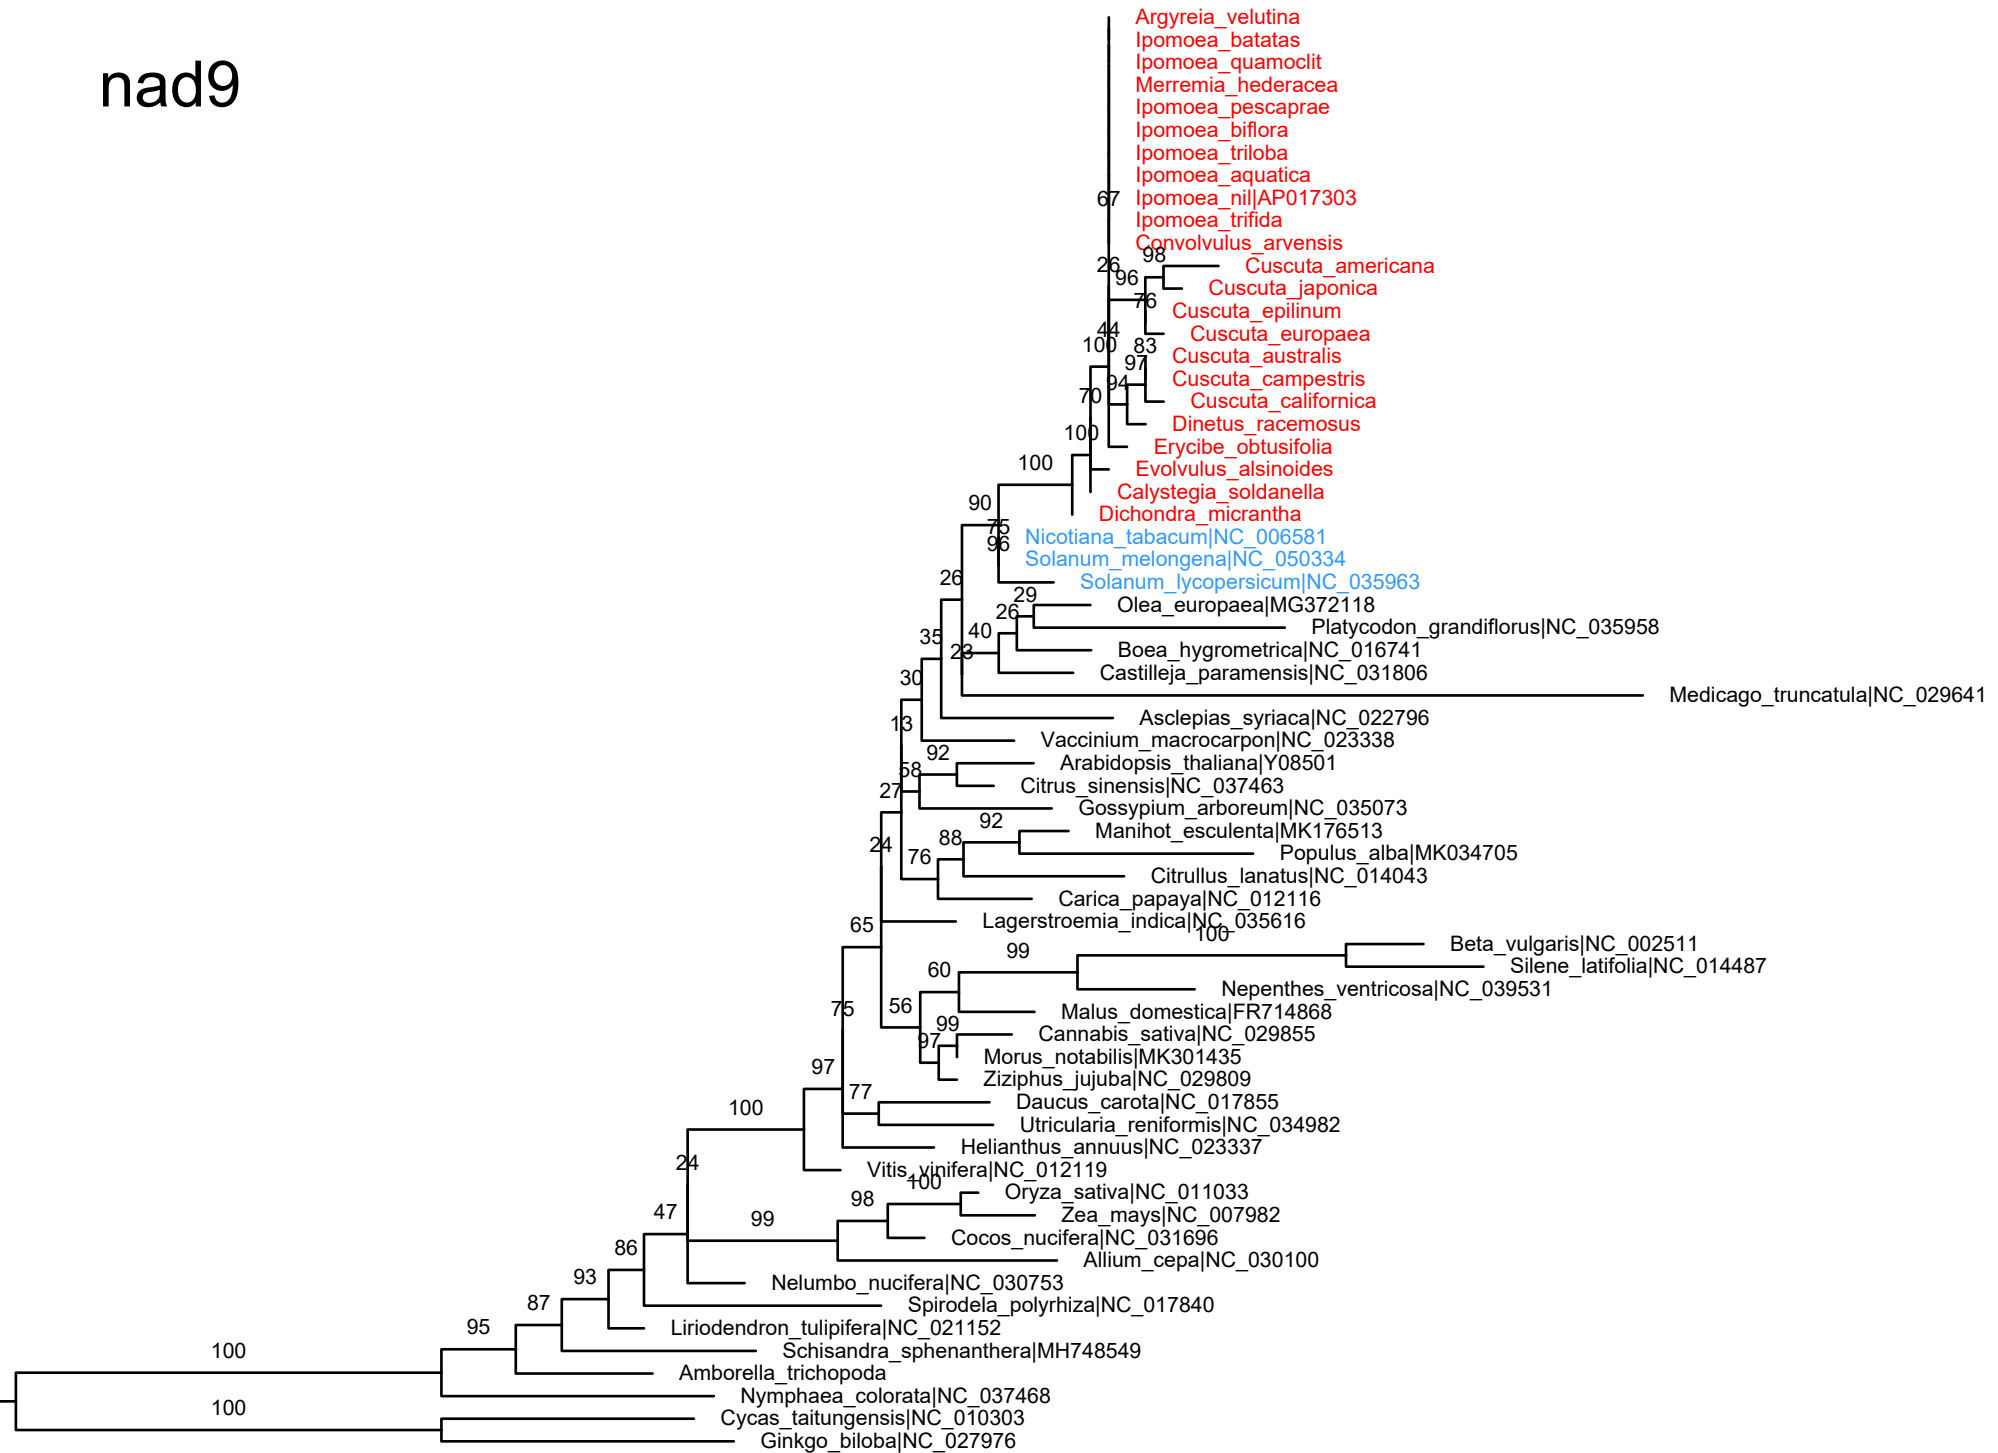

0.02

rpl5

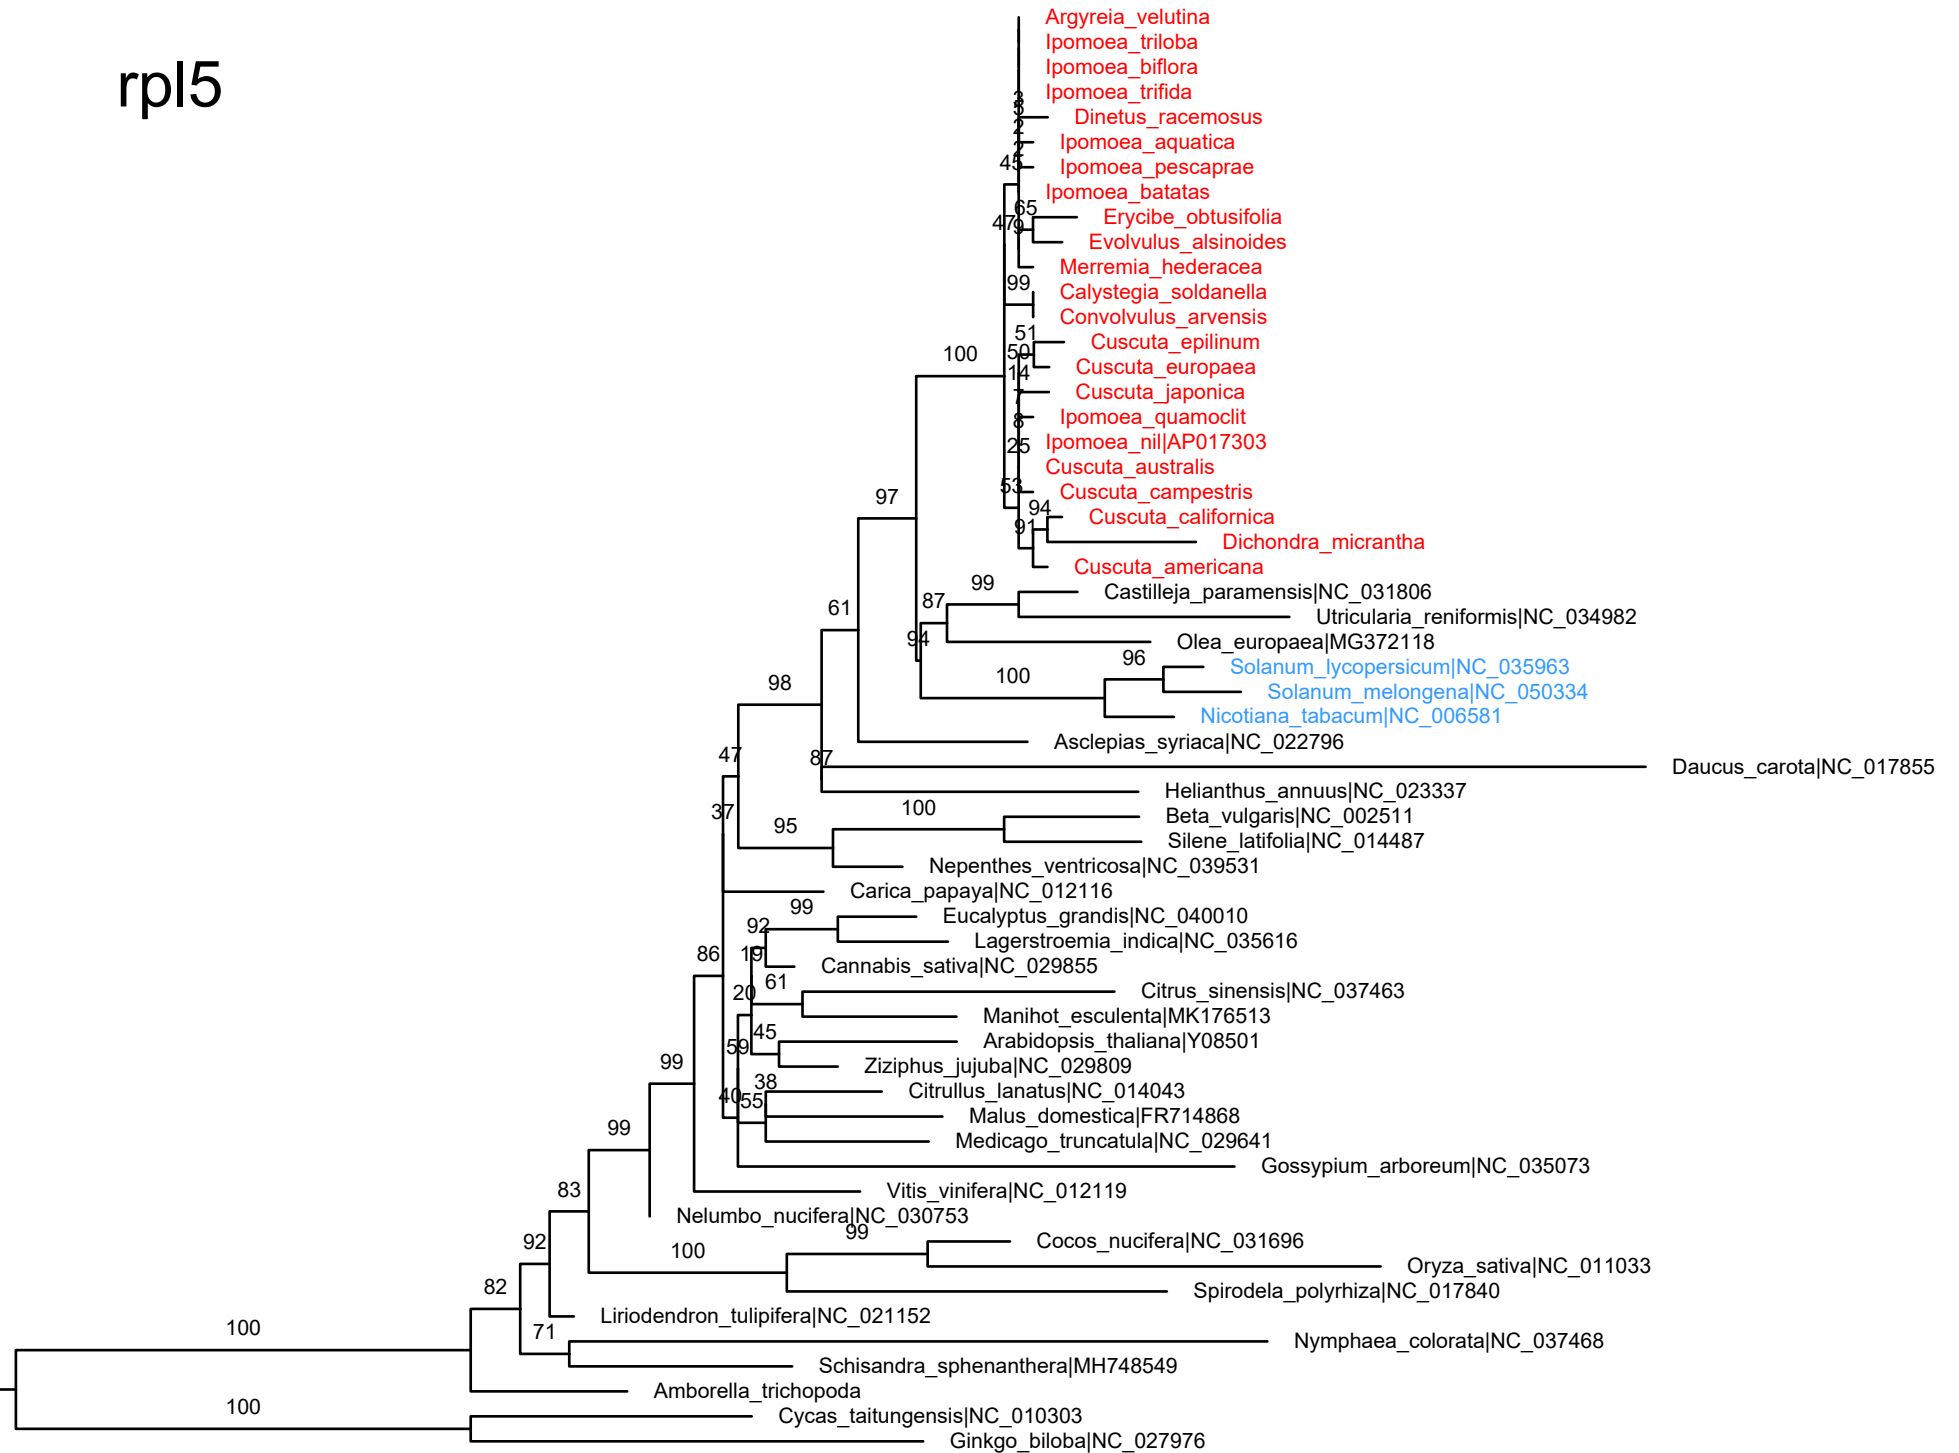

0.03

# rpl10

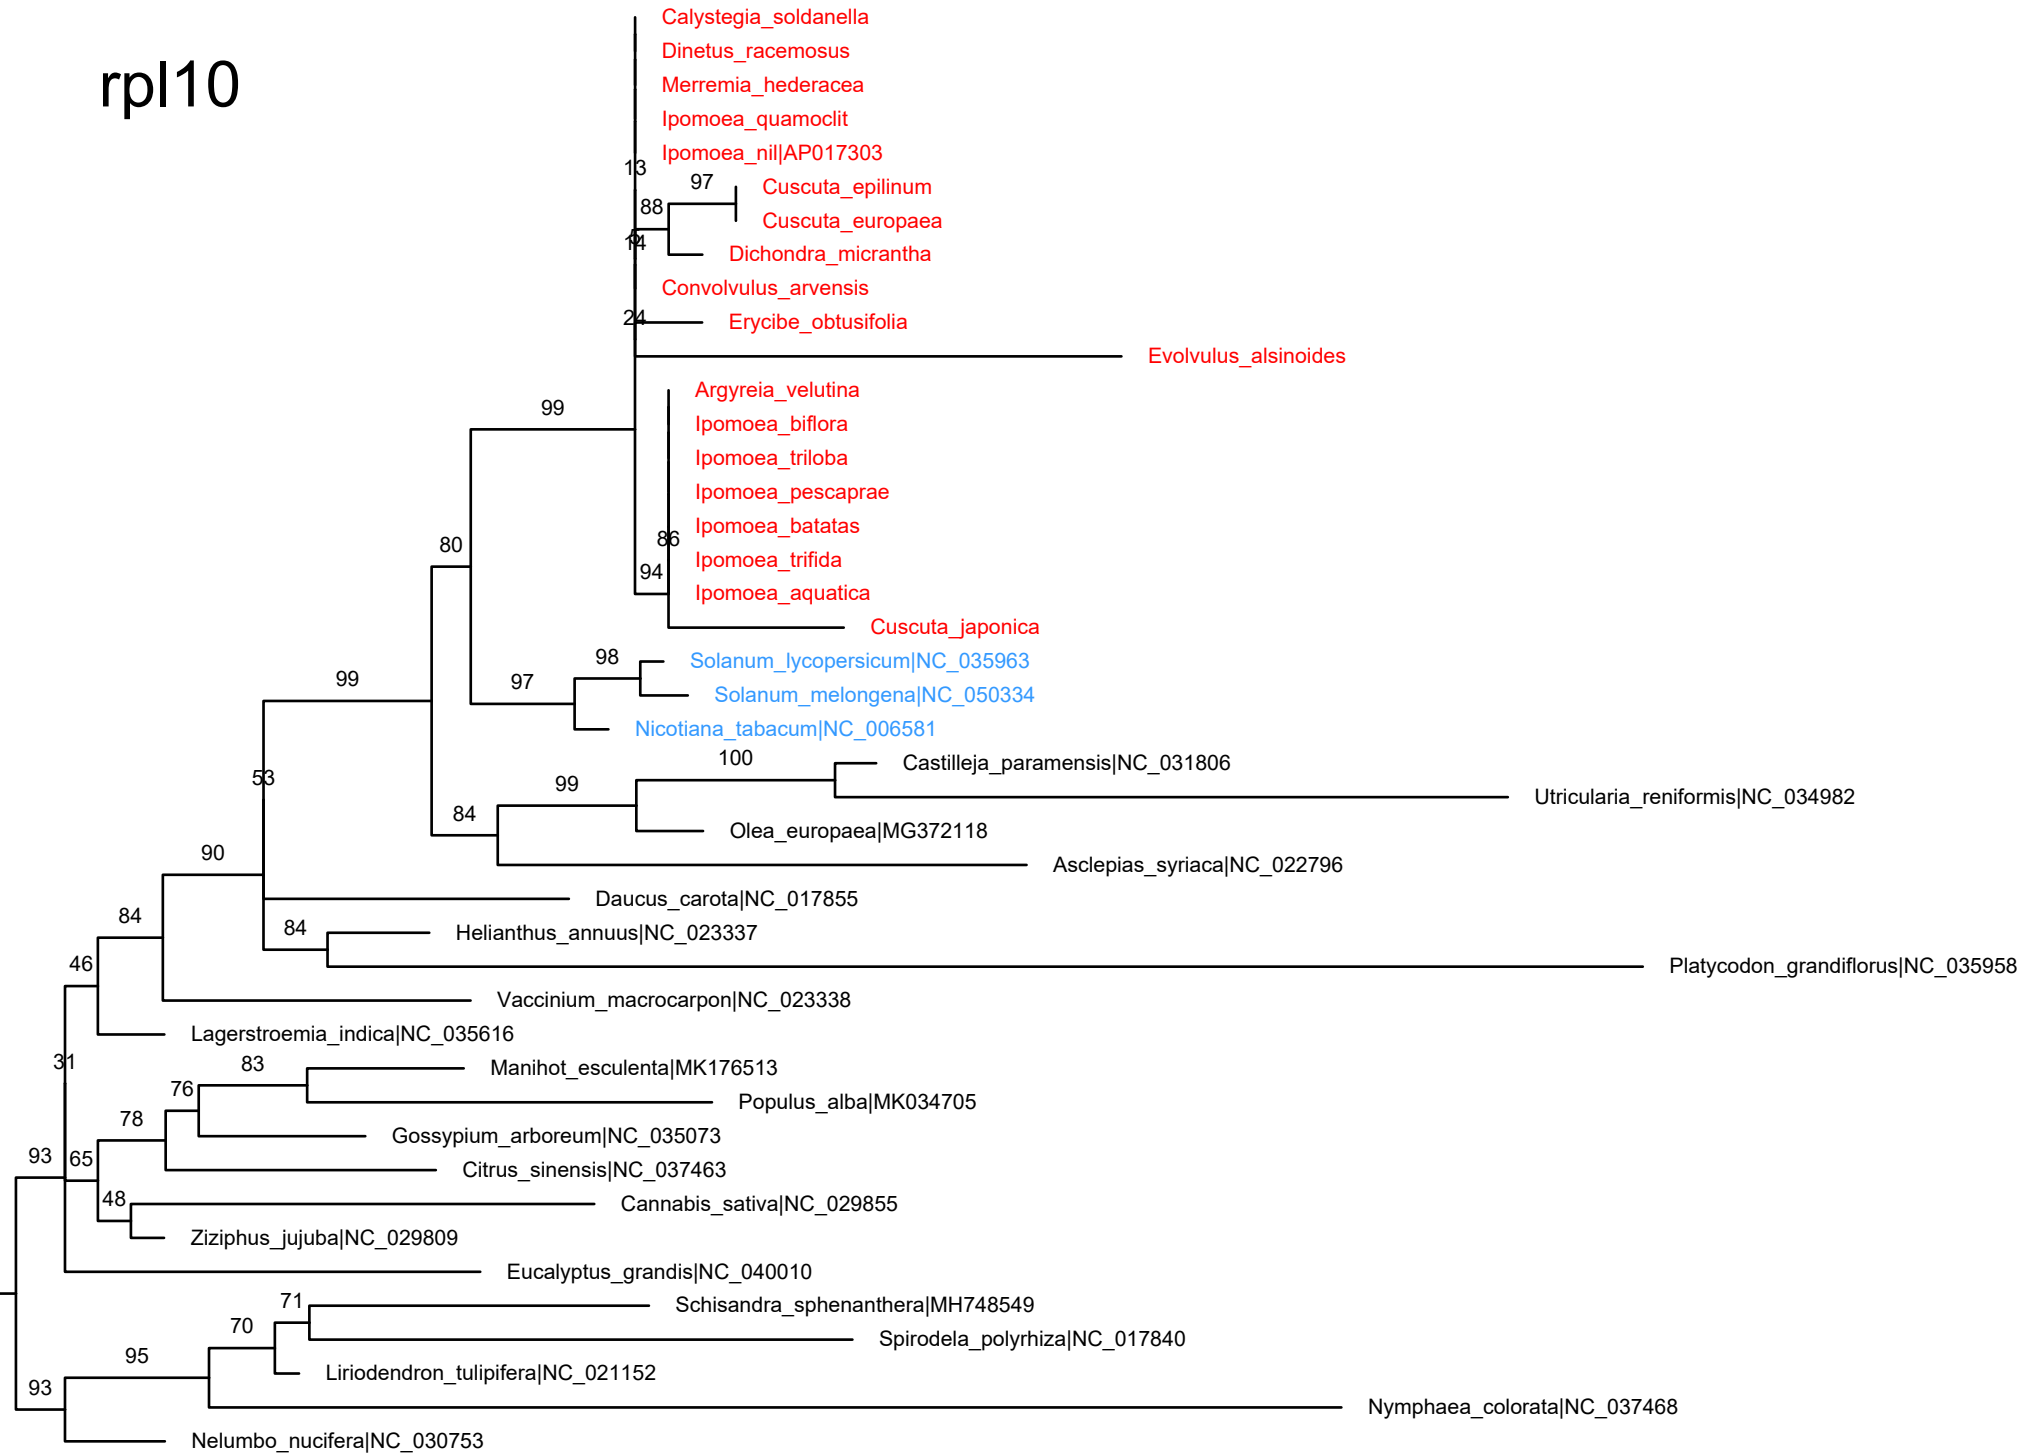

0.02

# rpl16

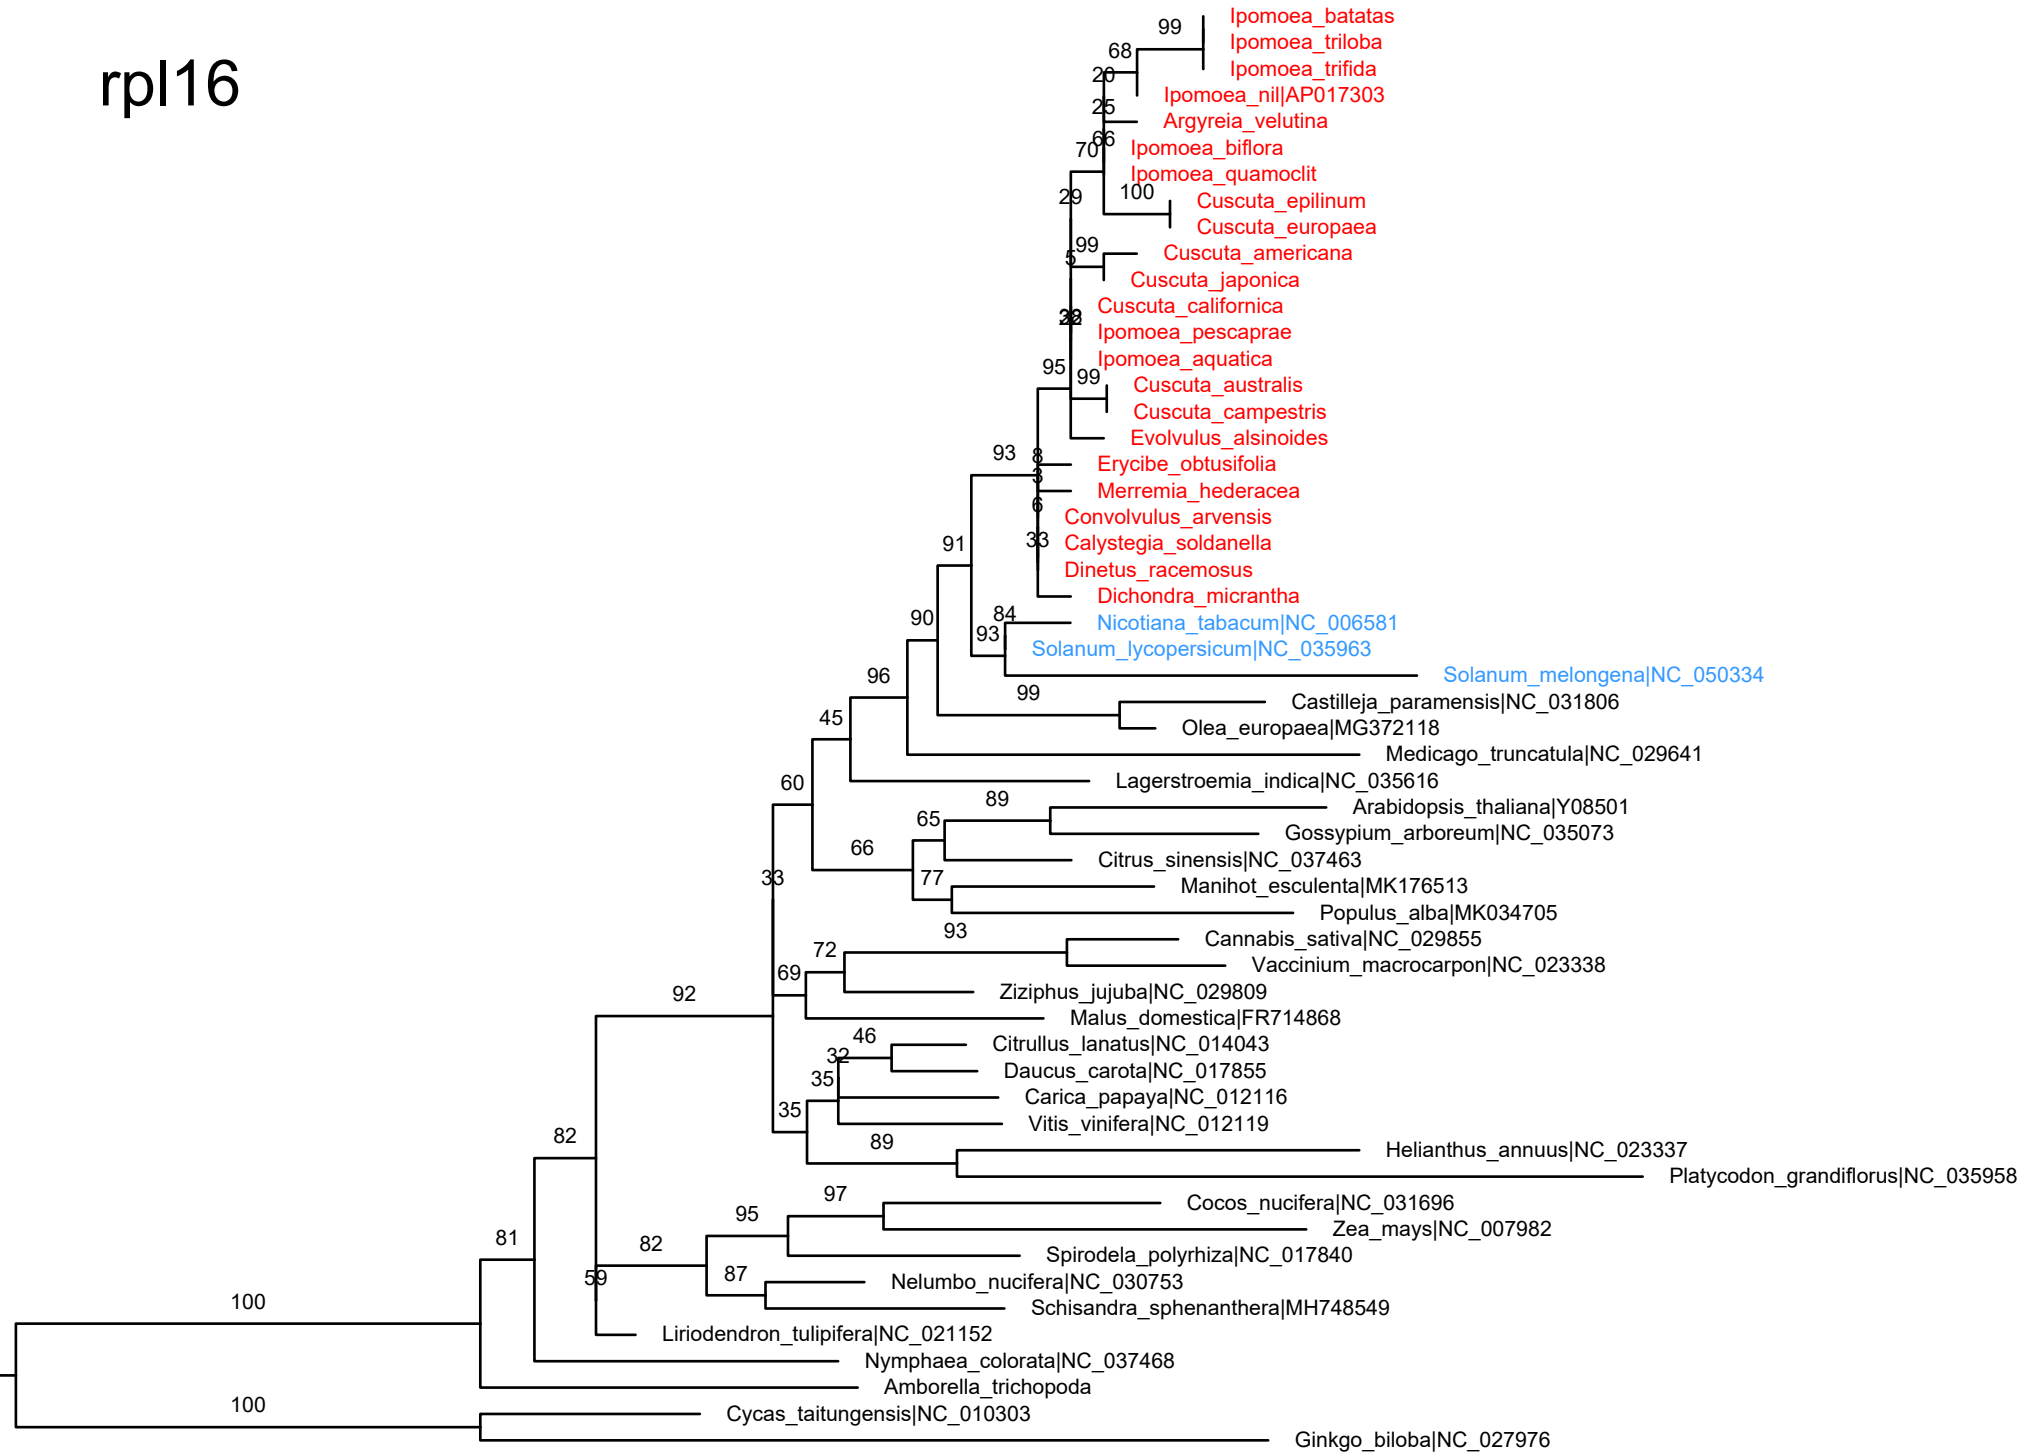

0.02



rps1

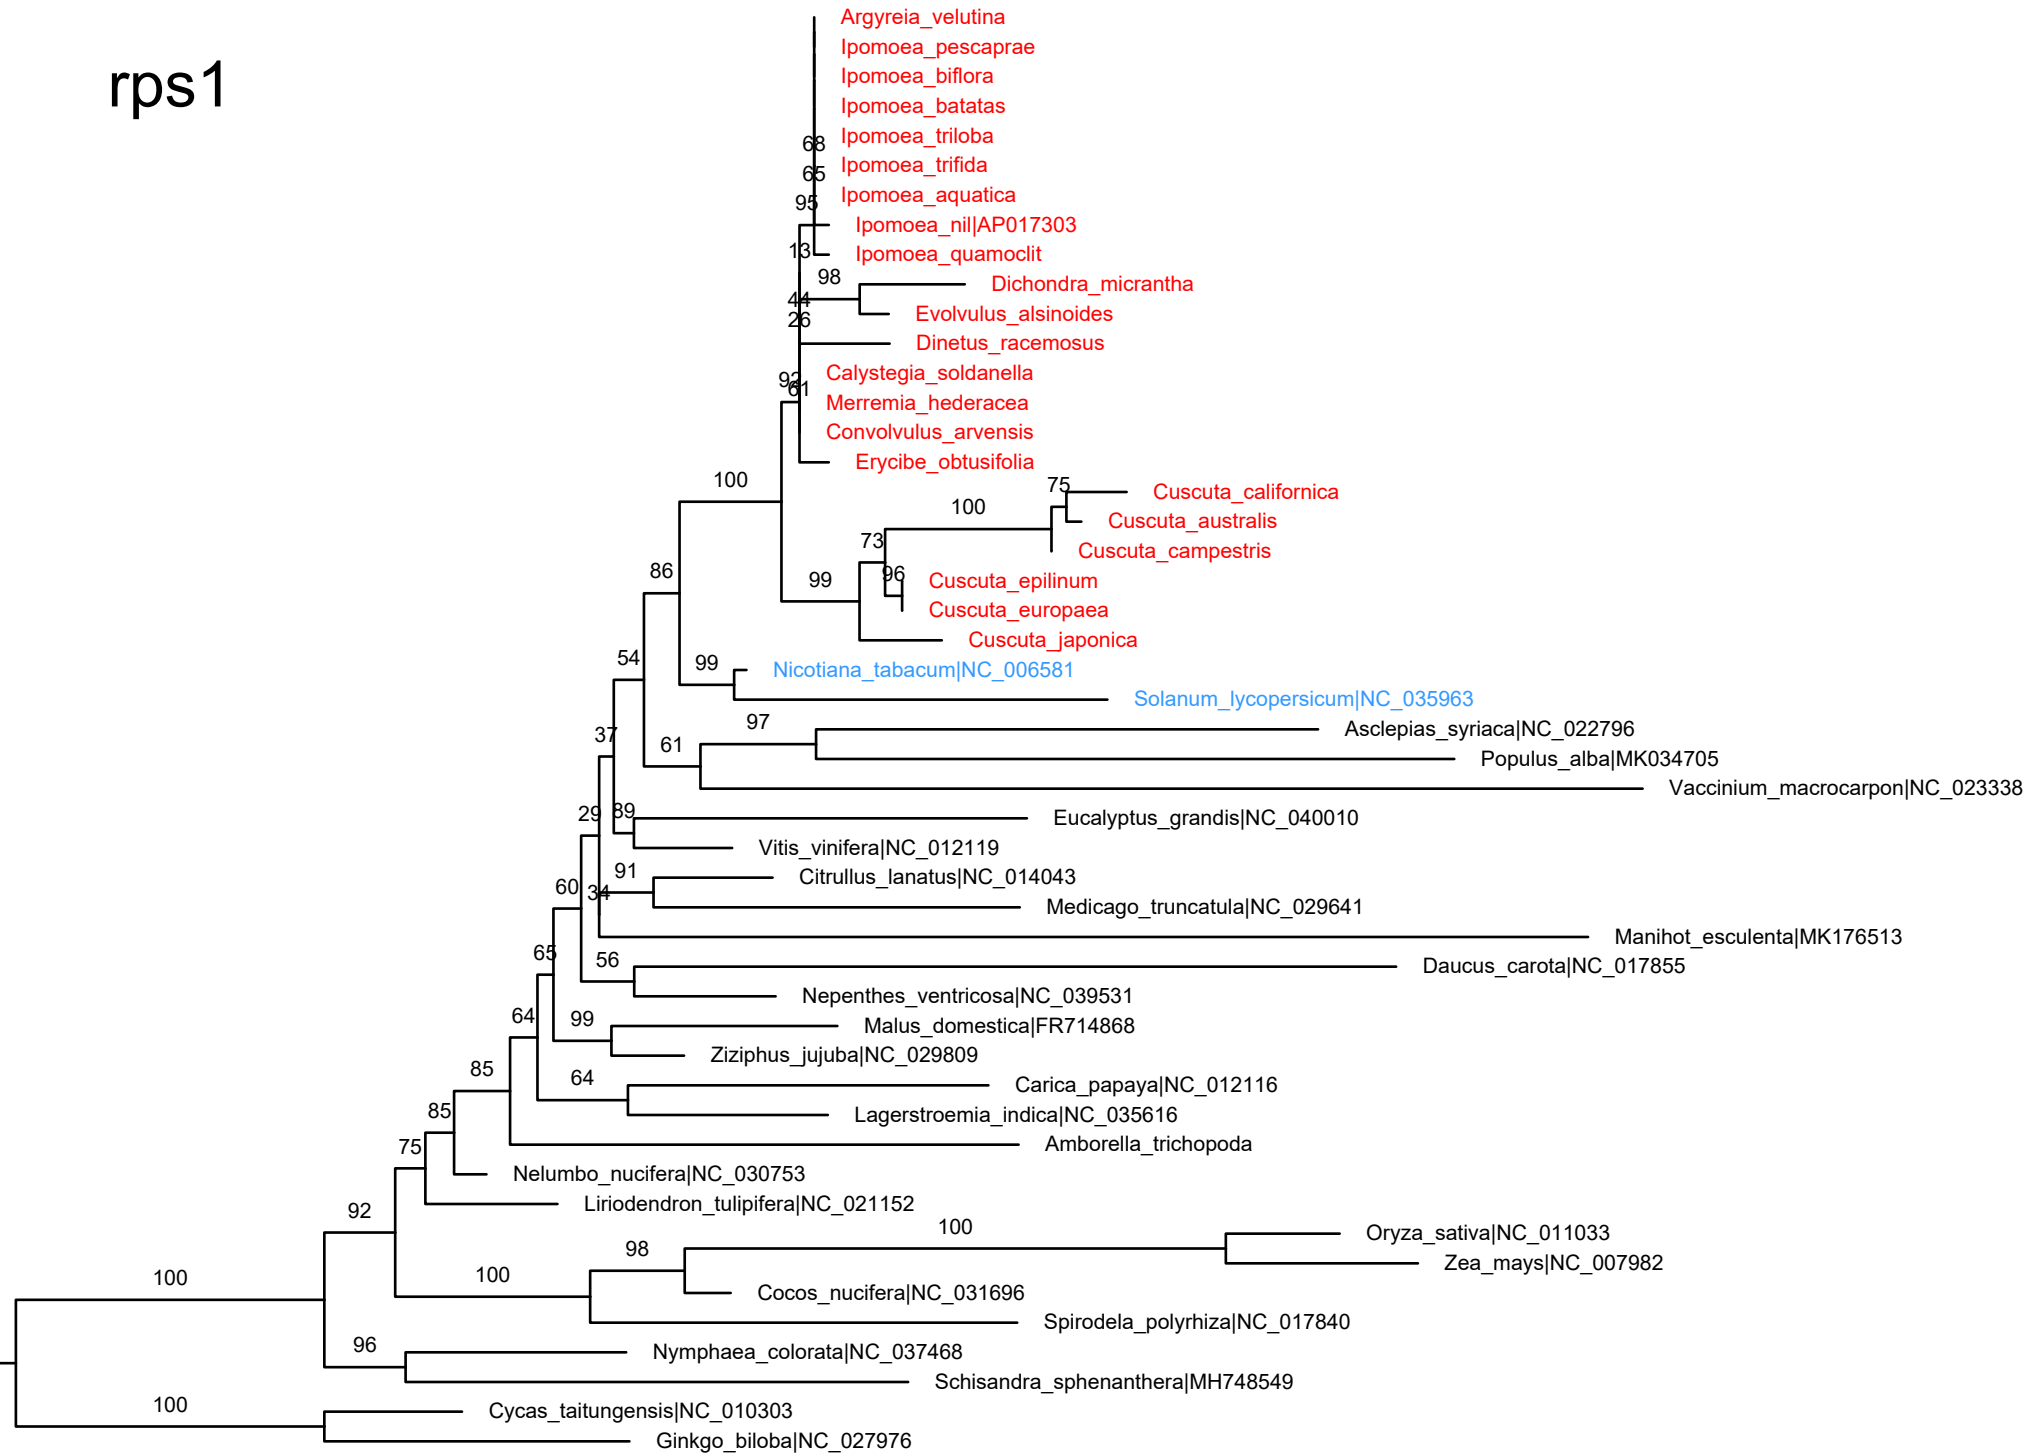

0.03

rps3

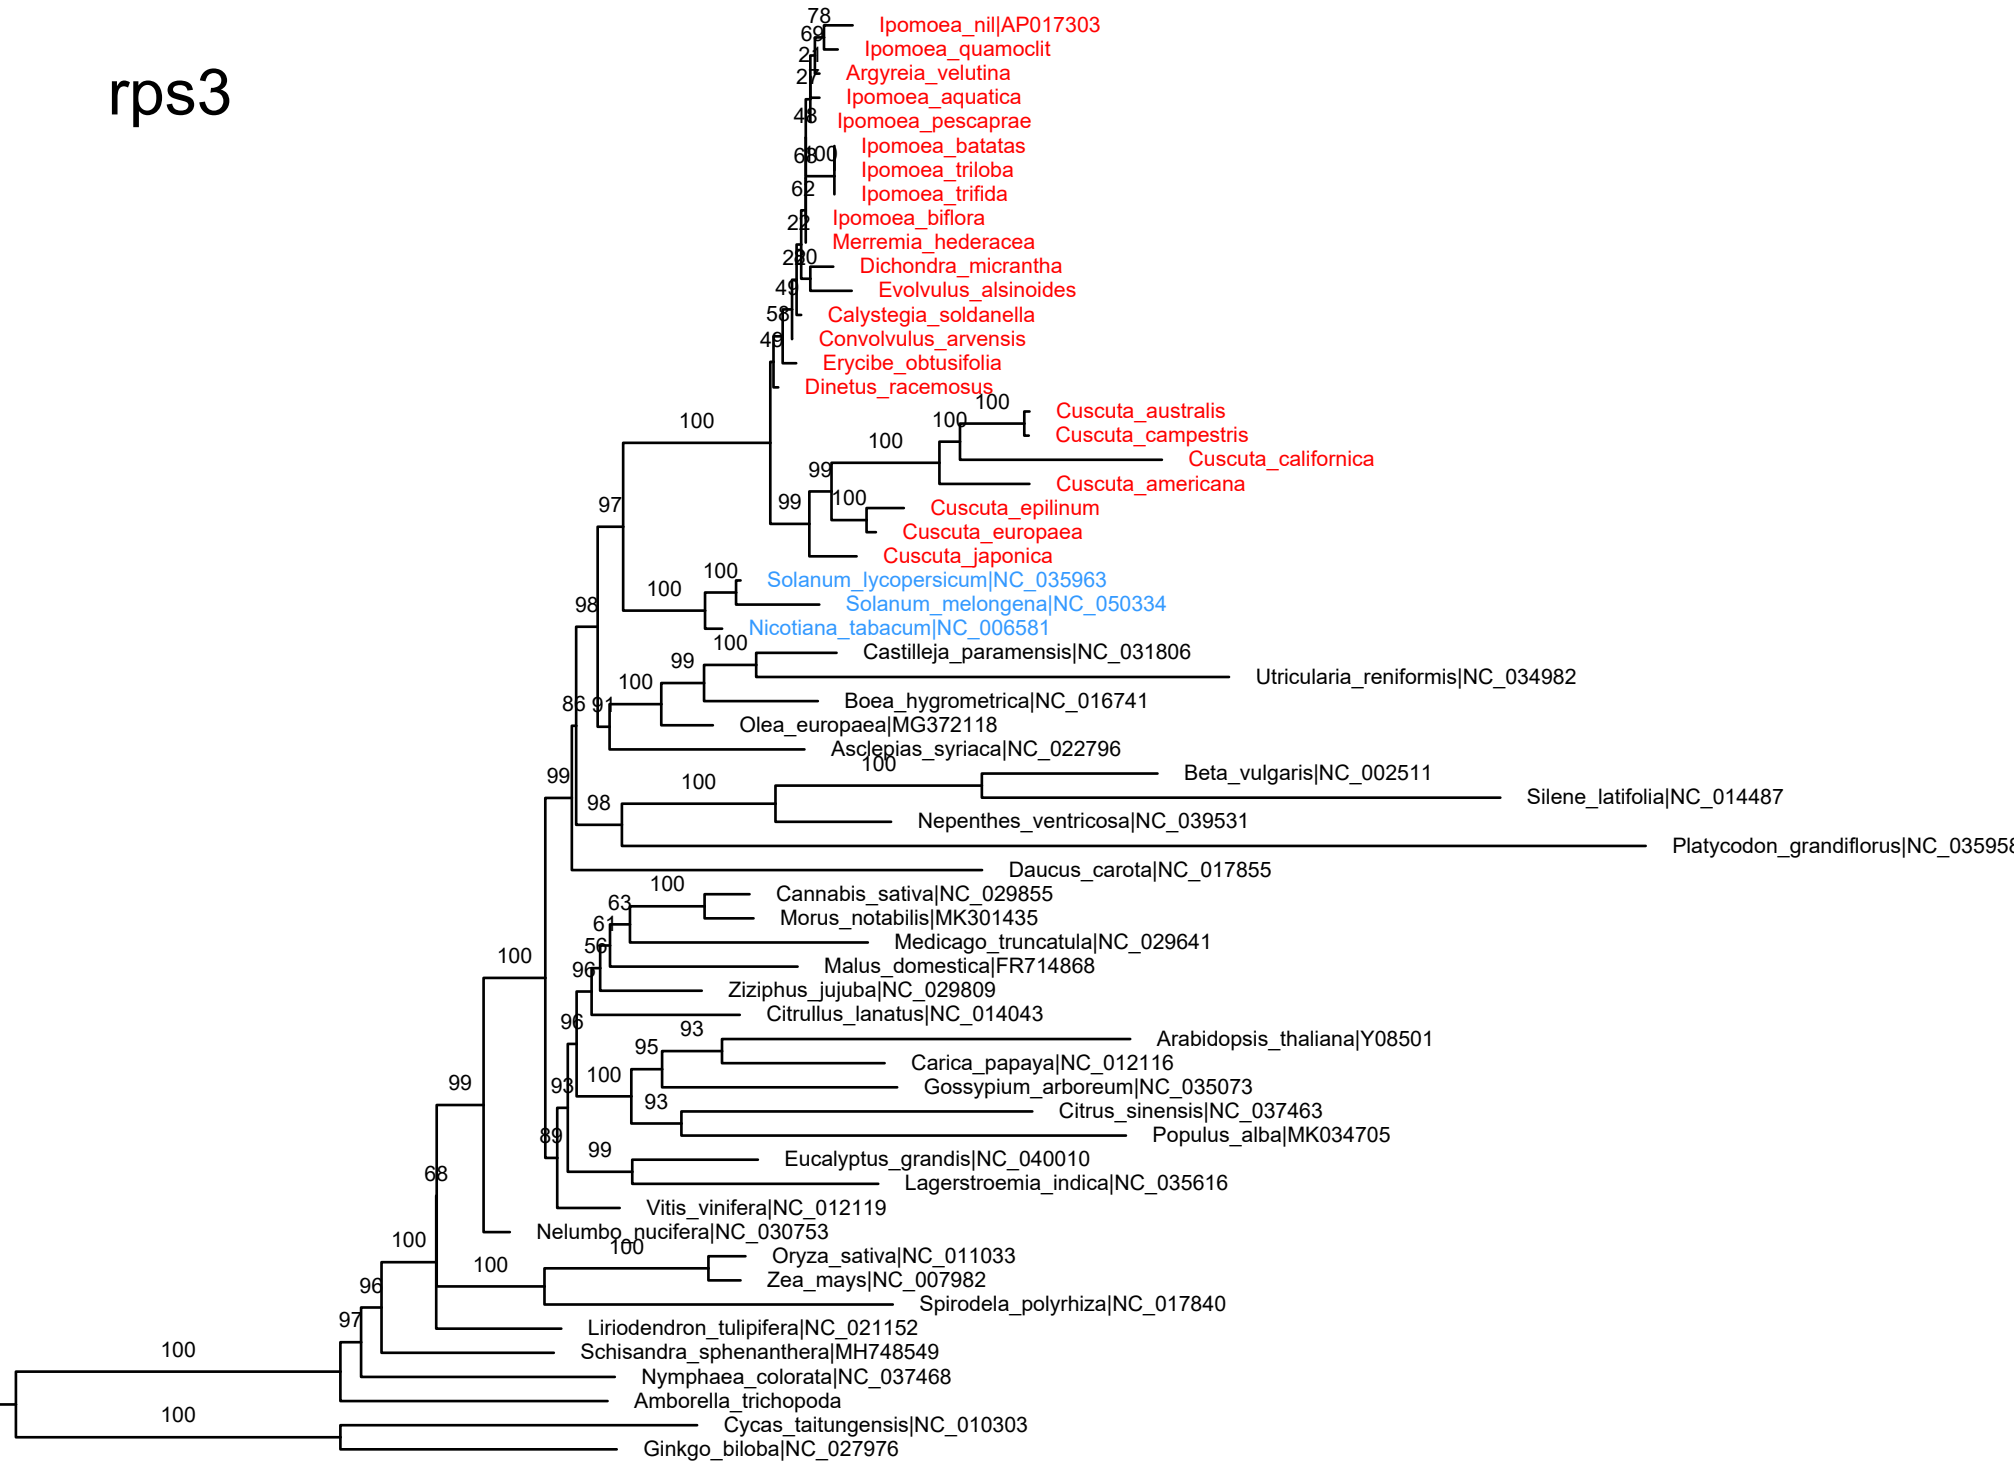

0.03

rps4

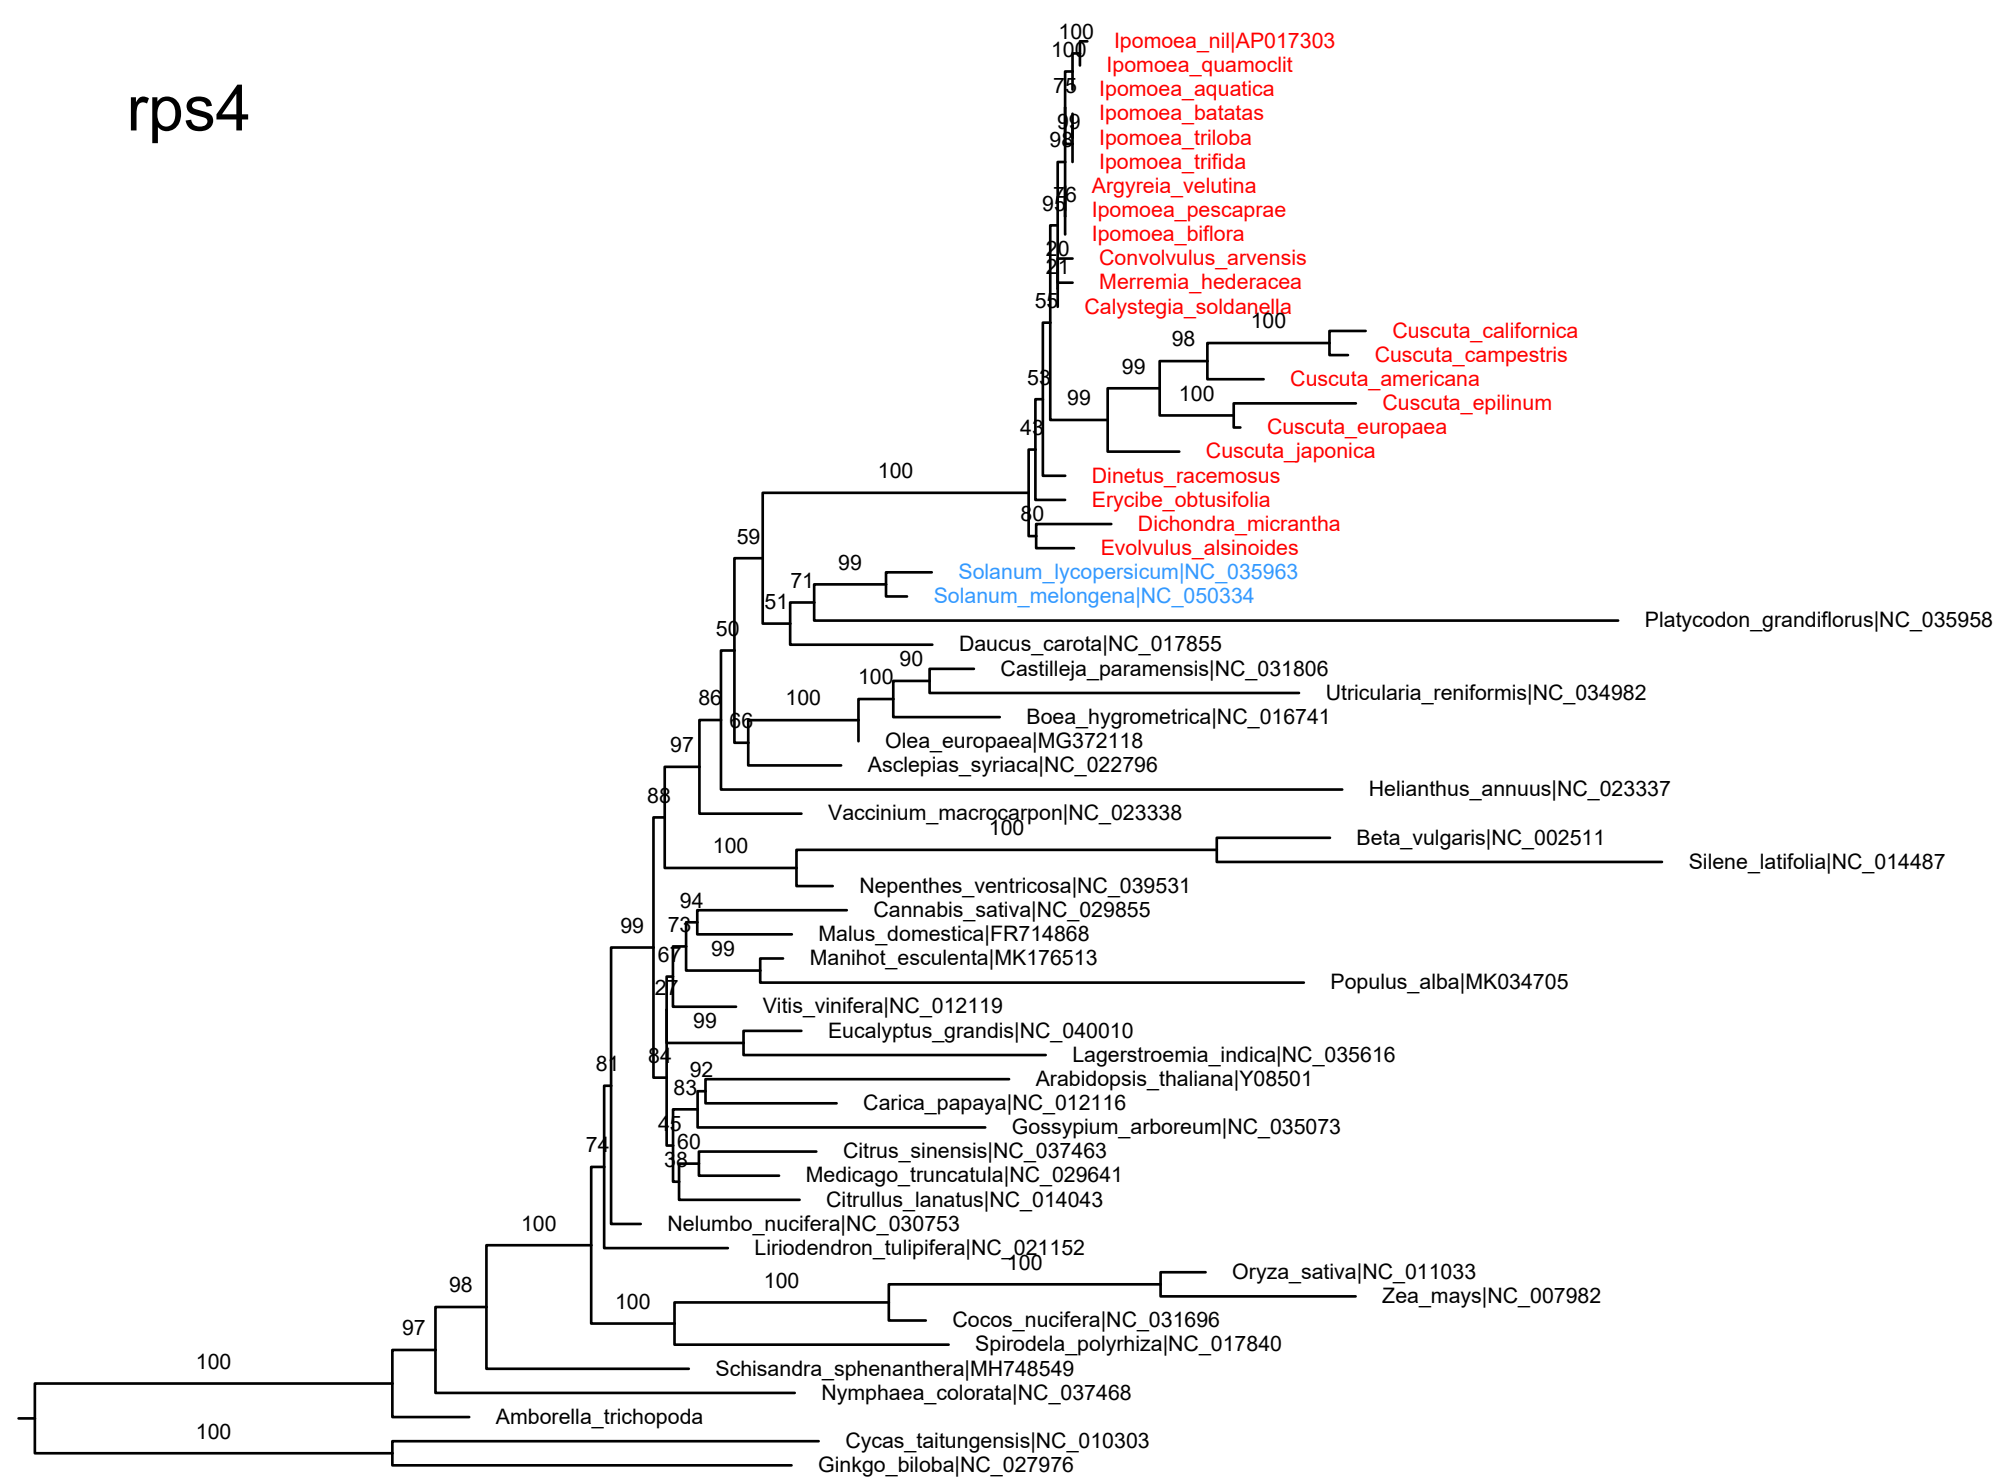

0.04

rps7

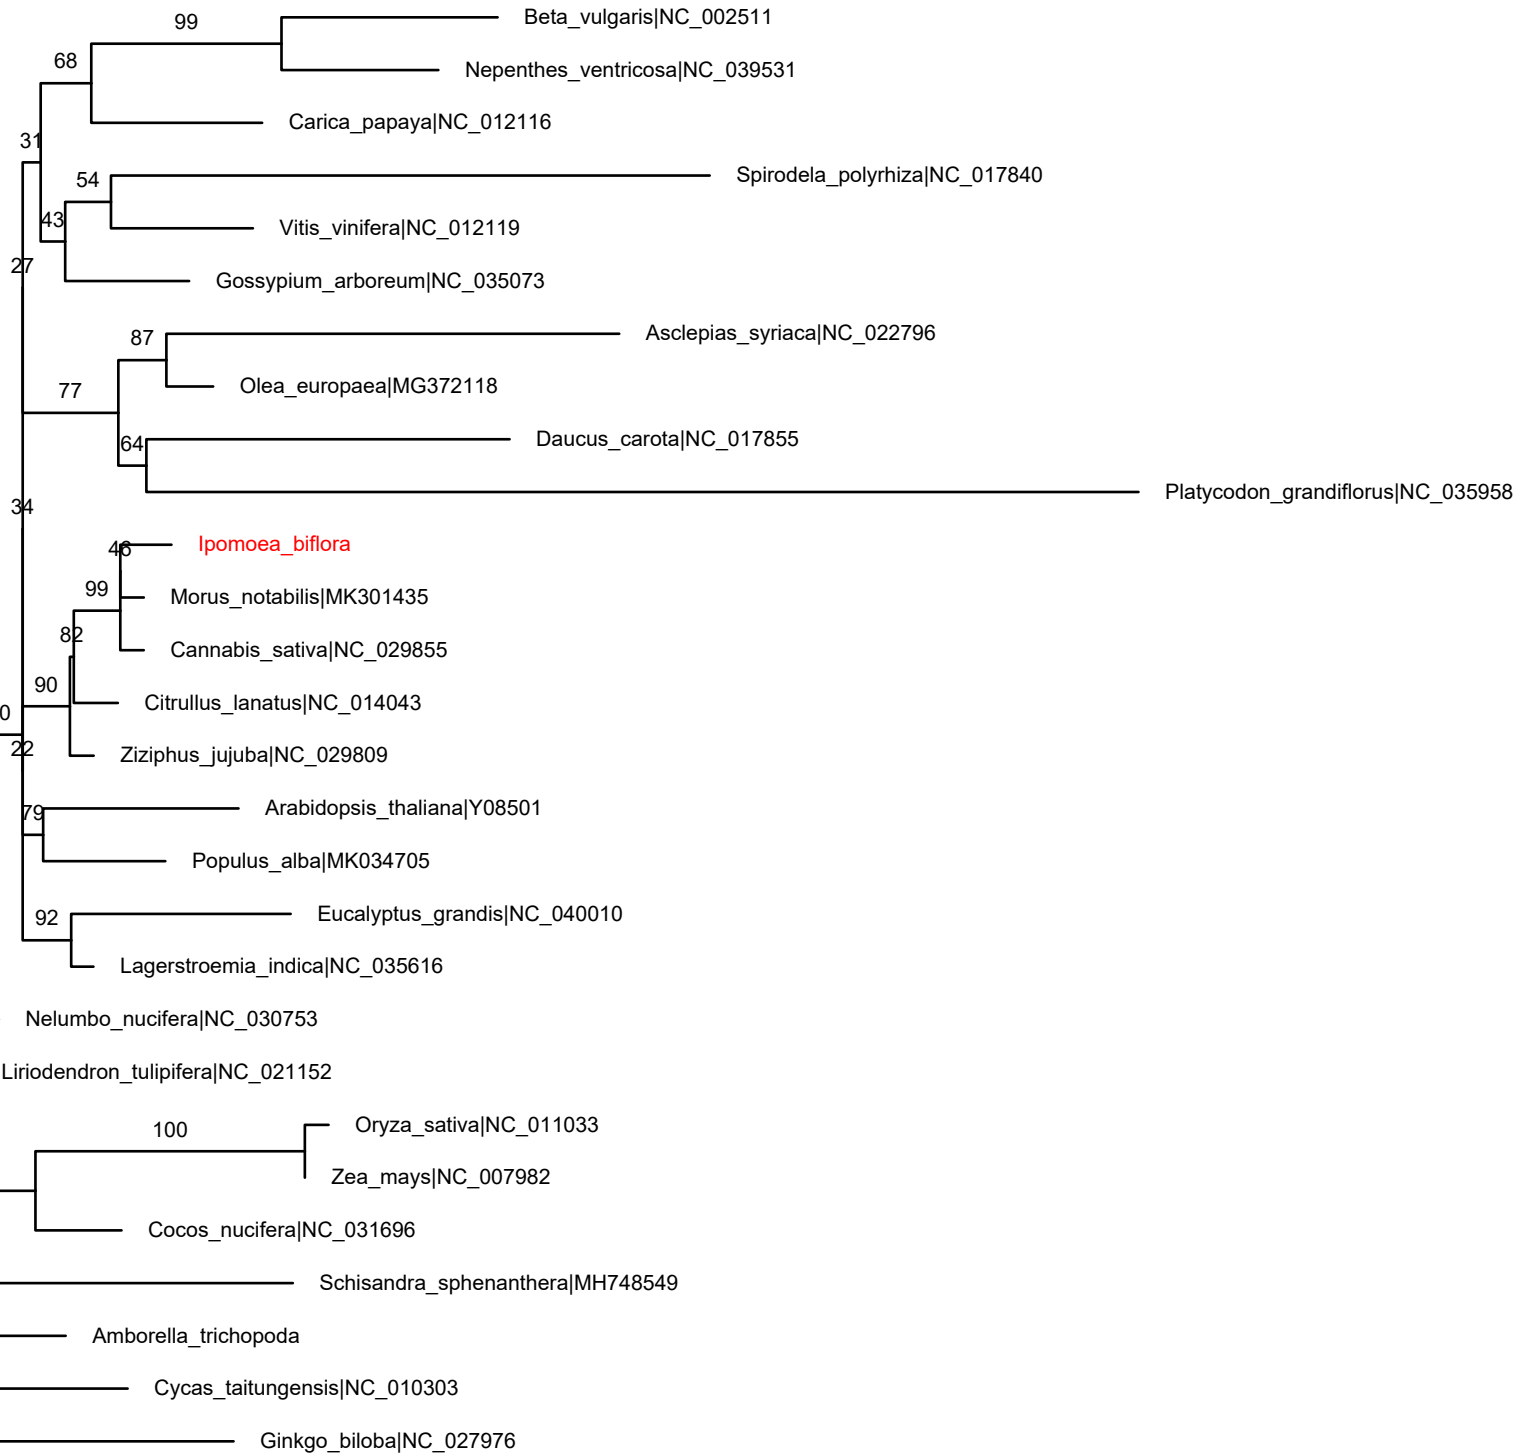

0.02

# rps10

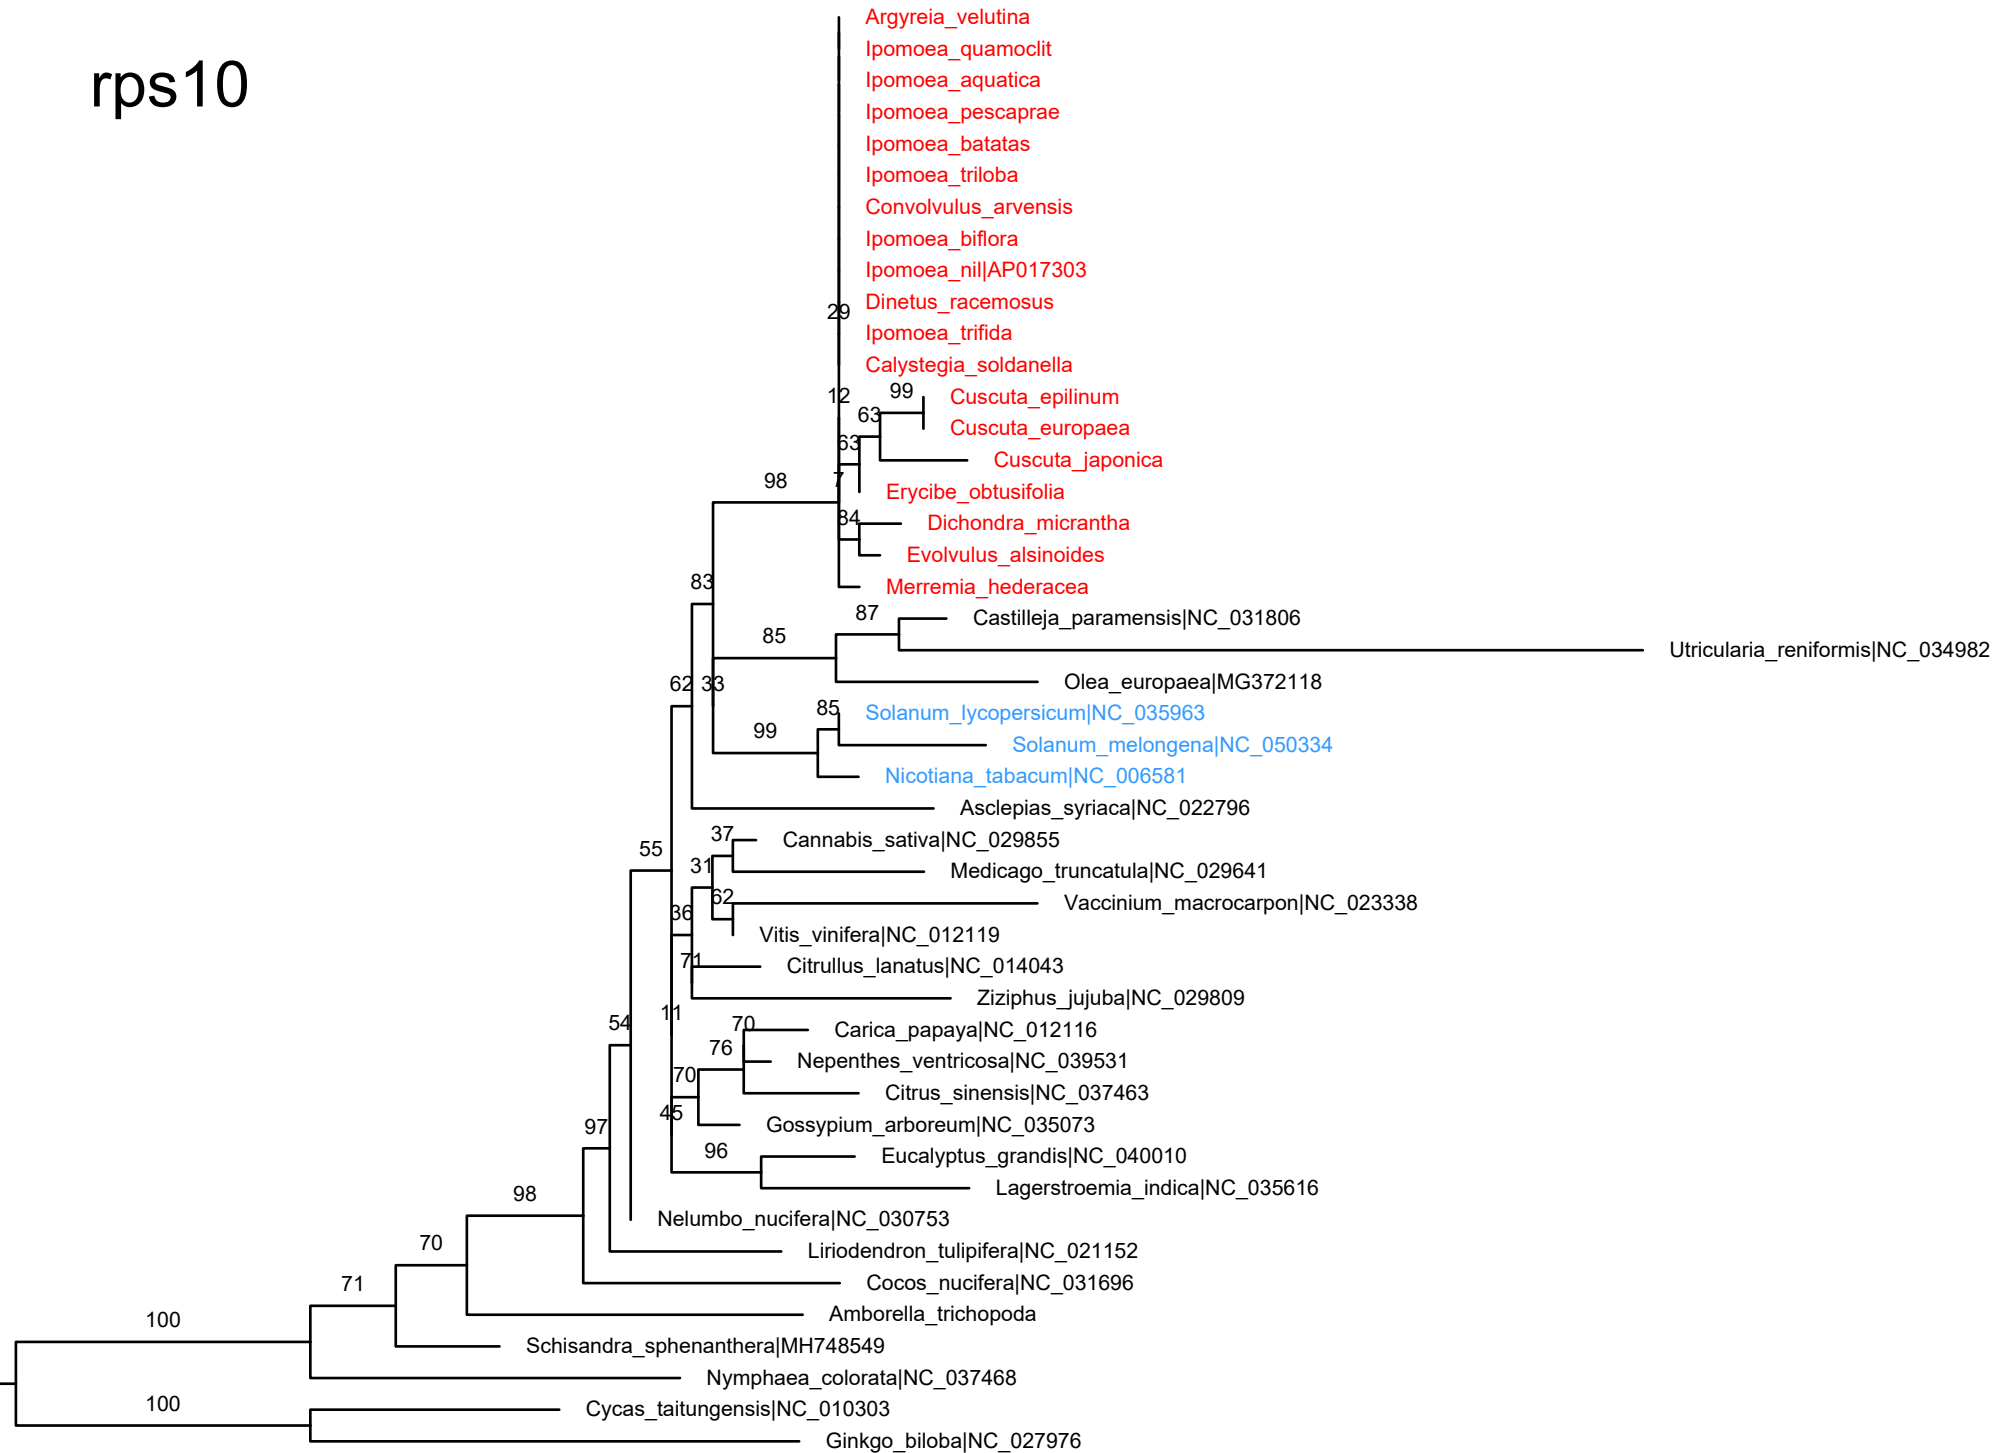

0.02

rps12

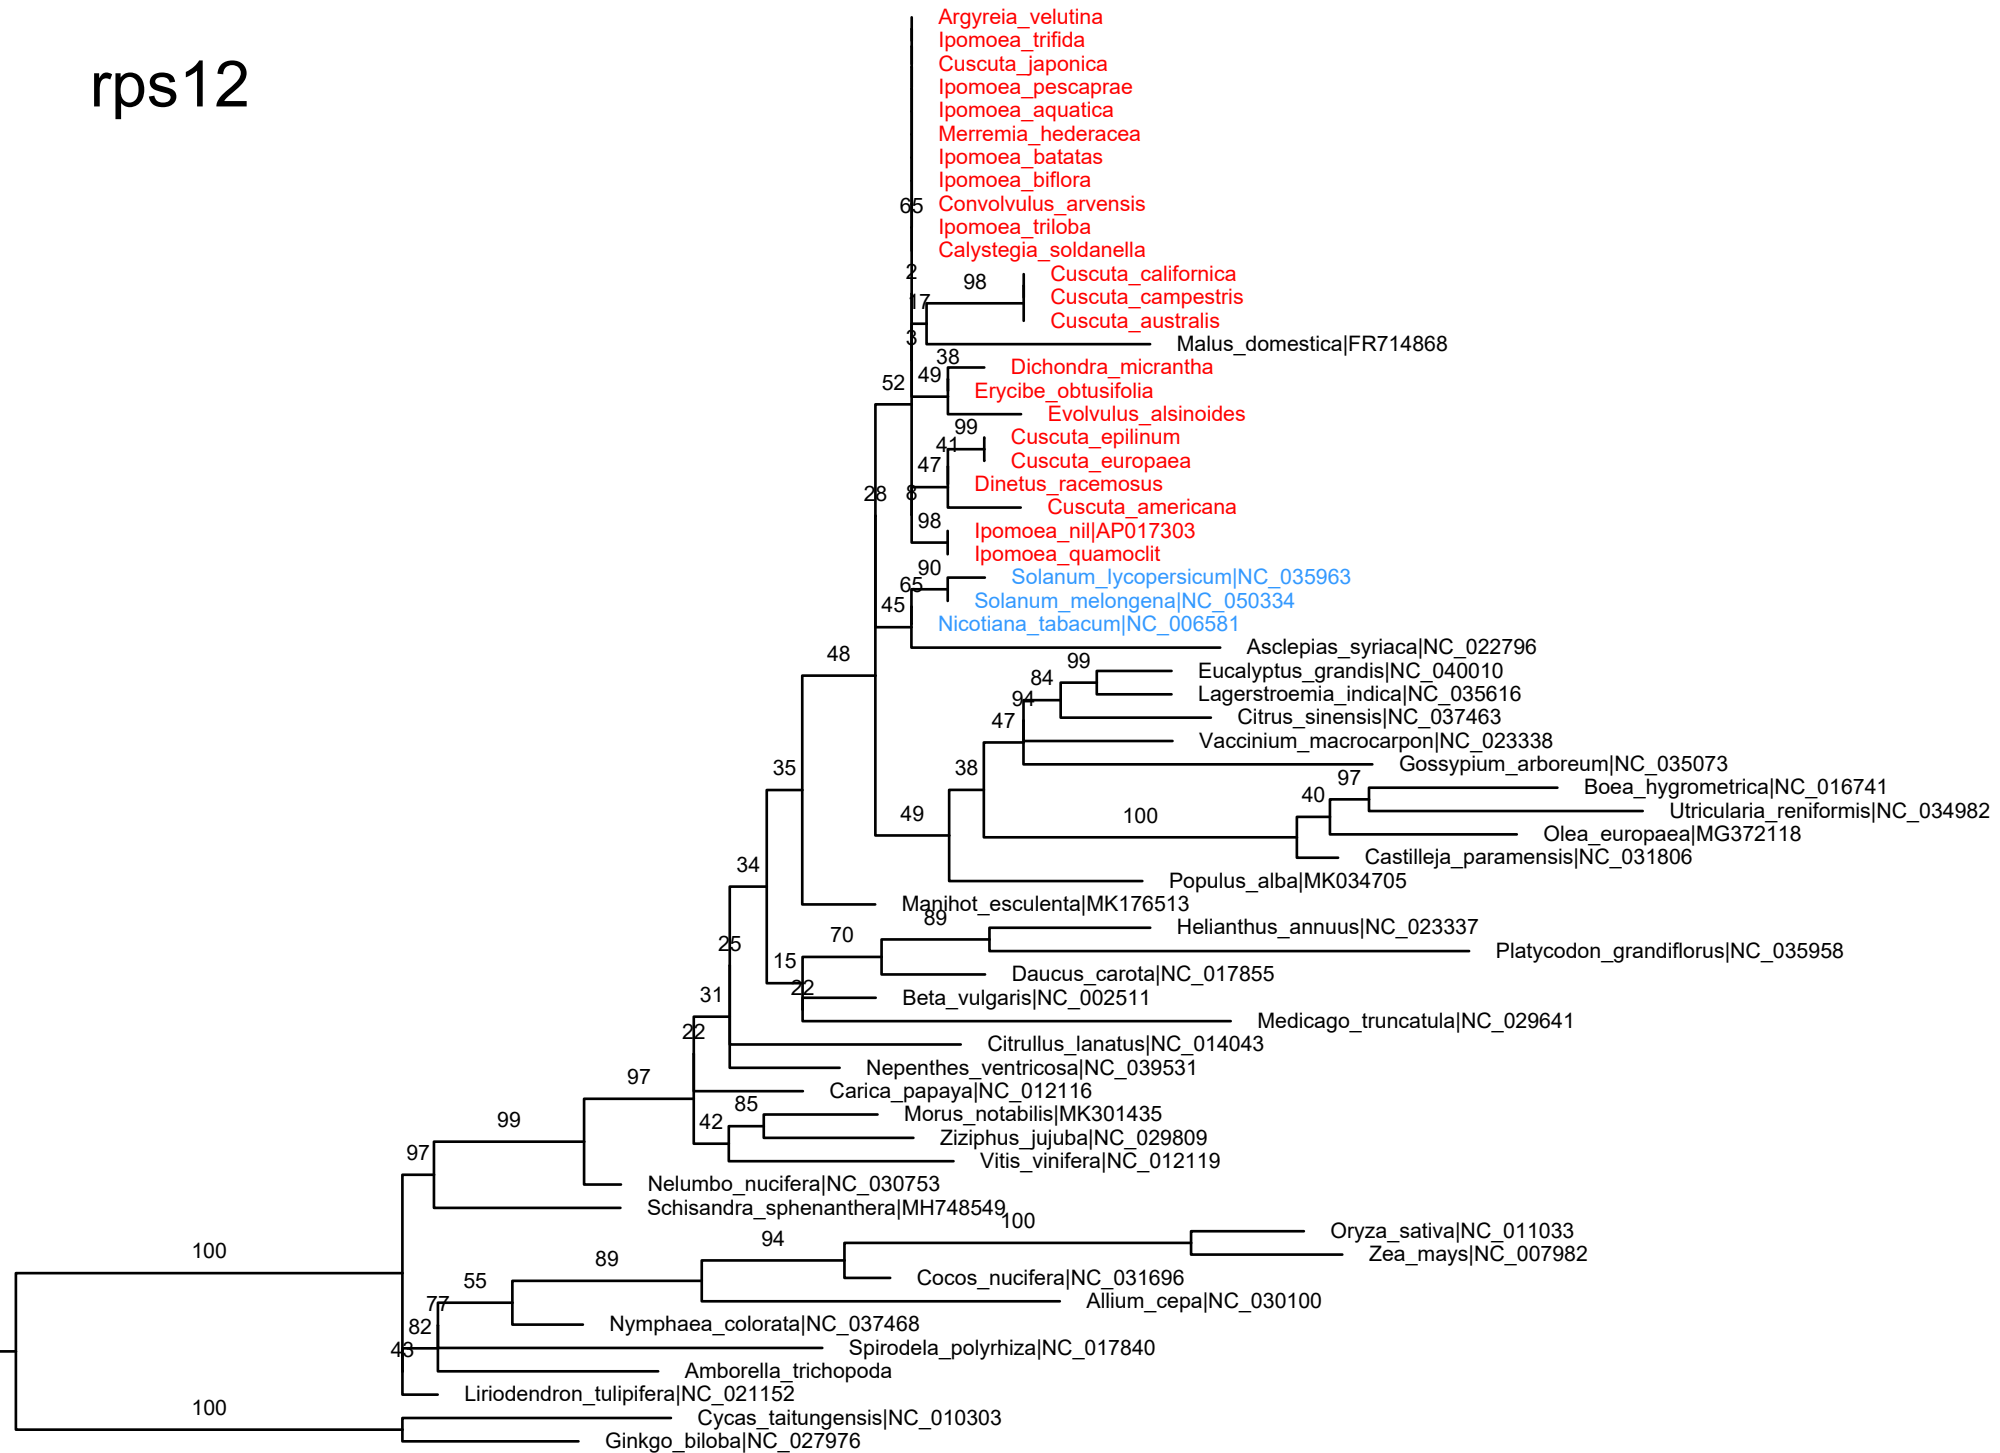

0.02

# rps13

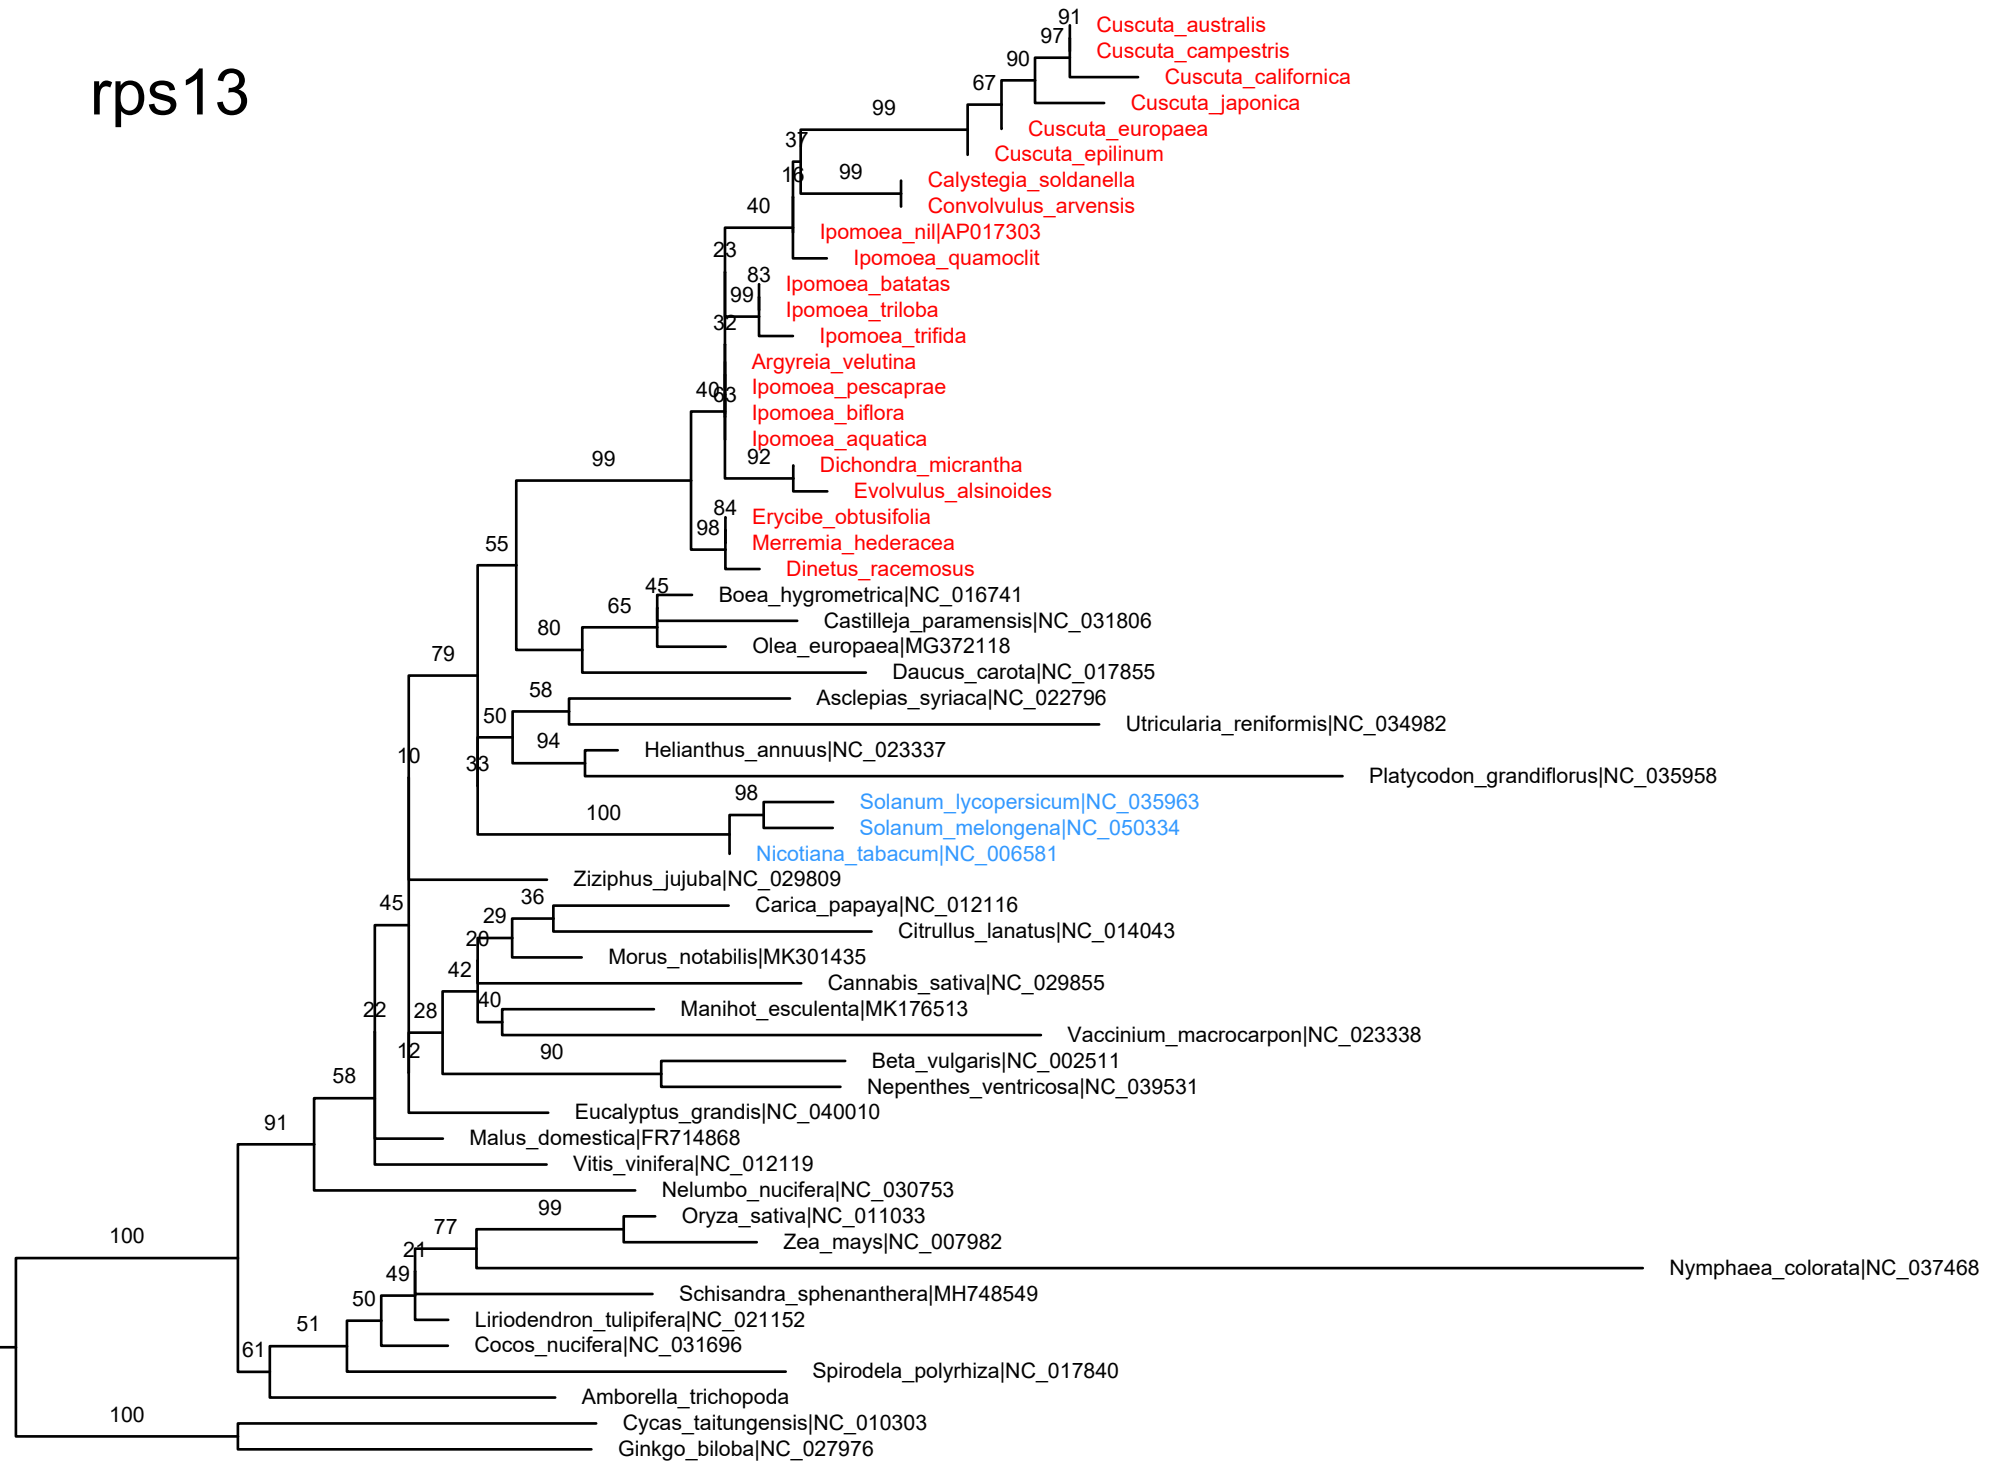

0.03

# rps14

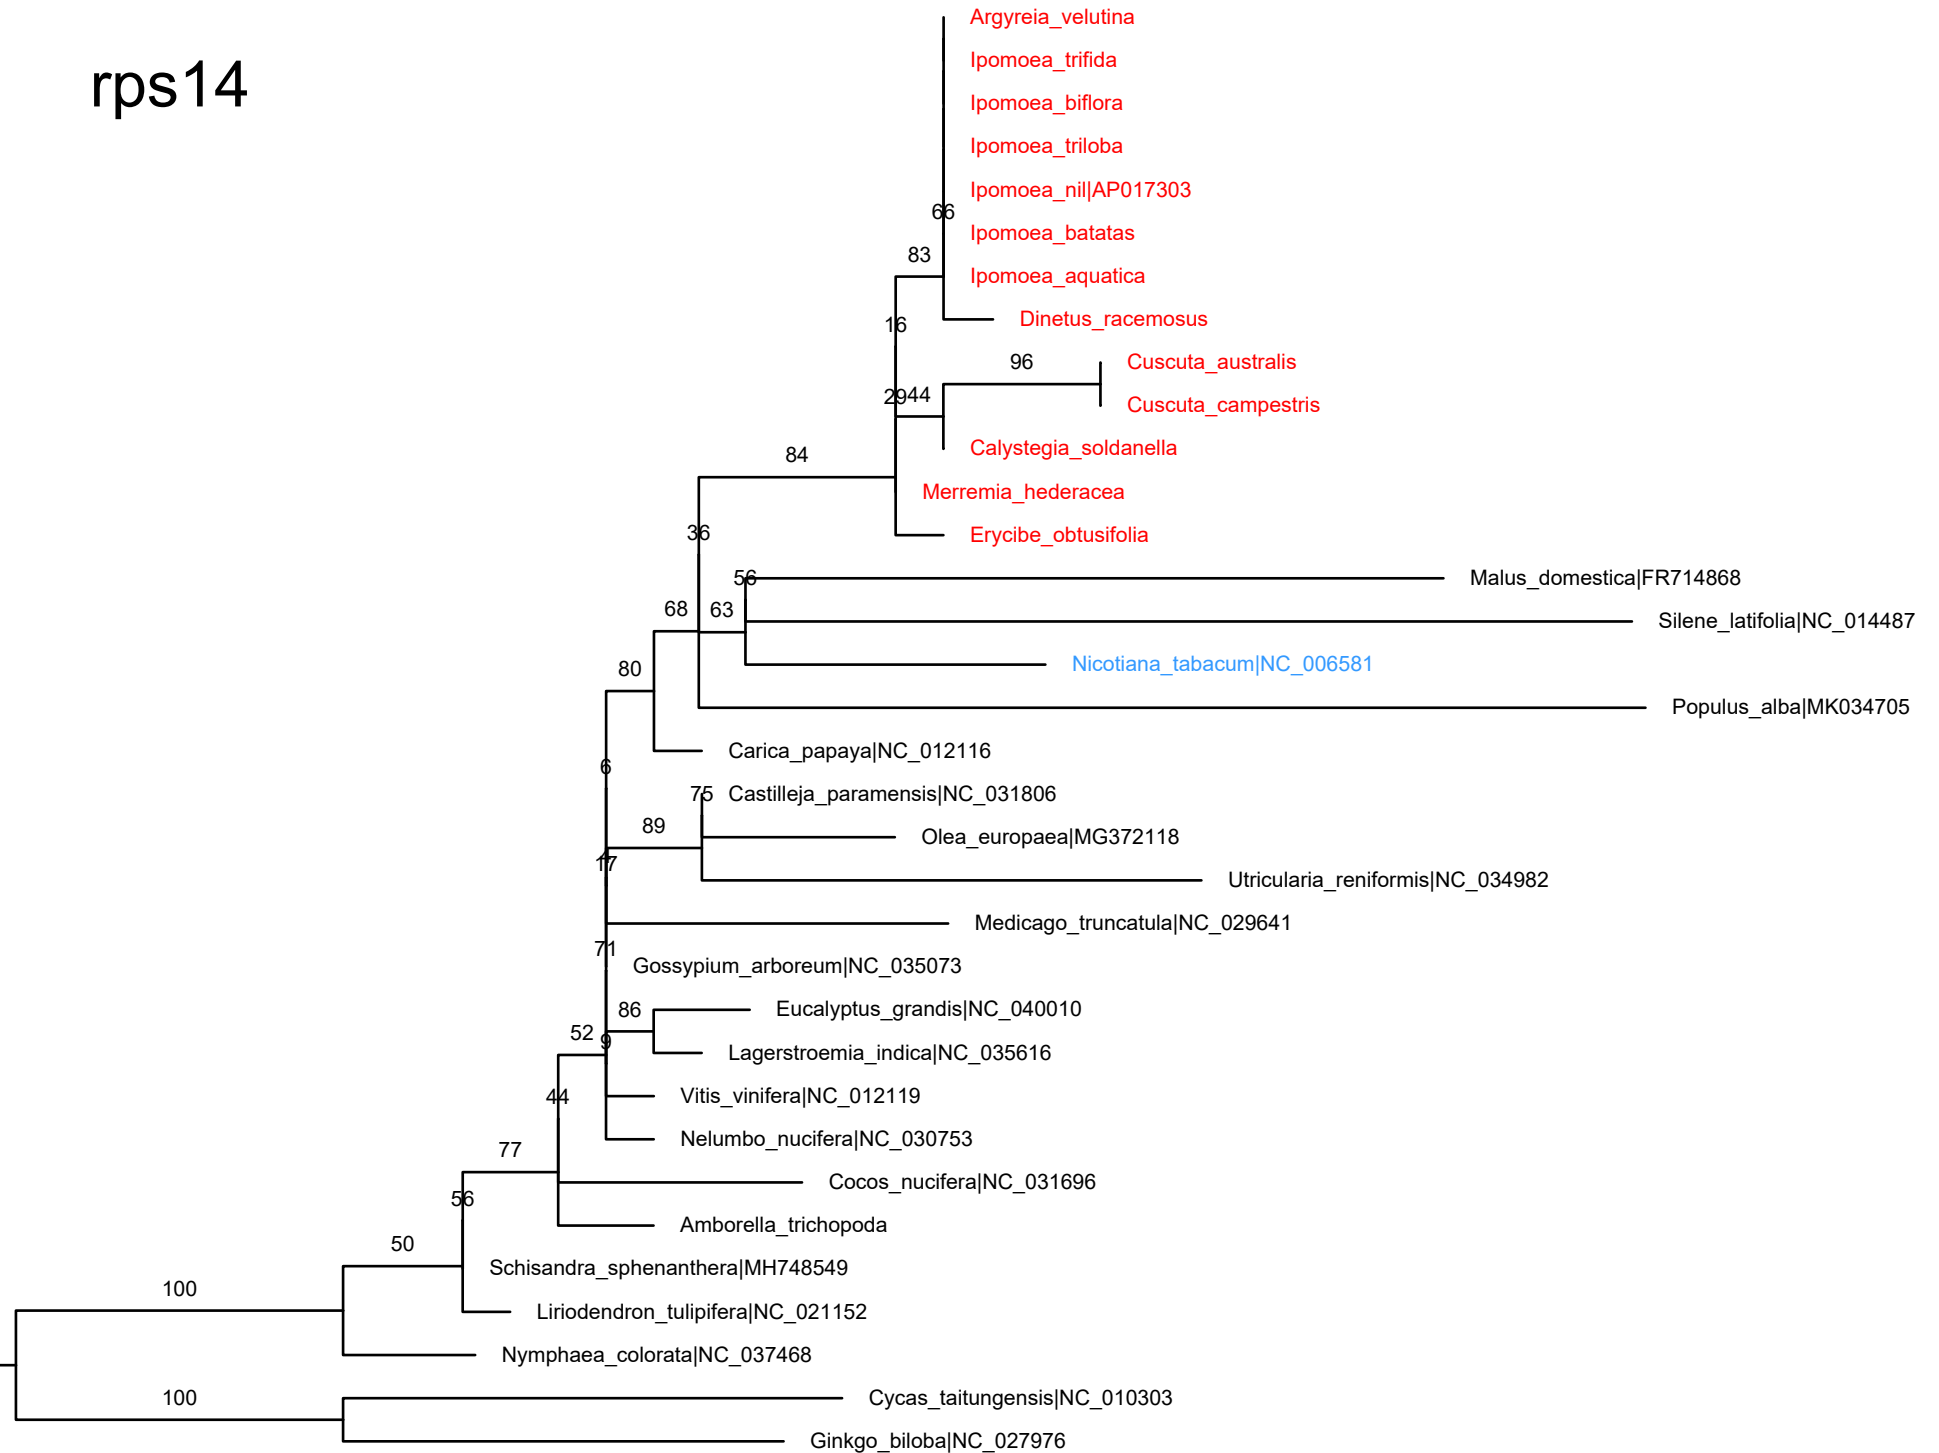

0.01



# rps19

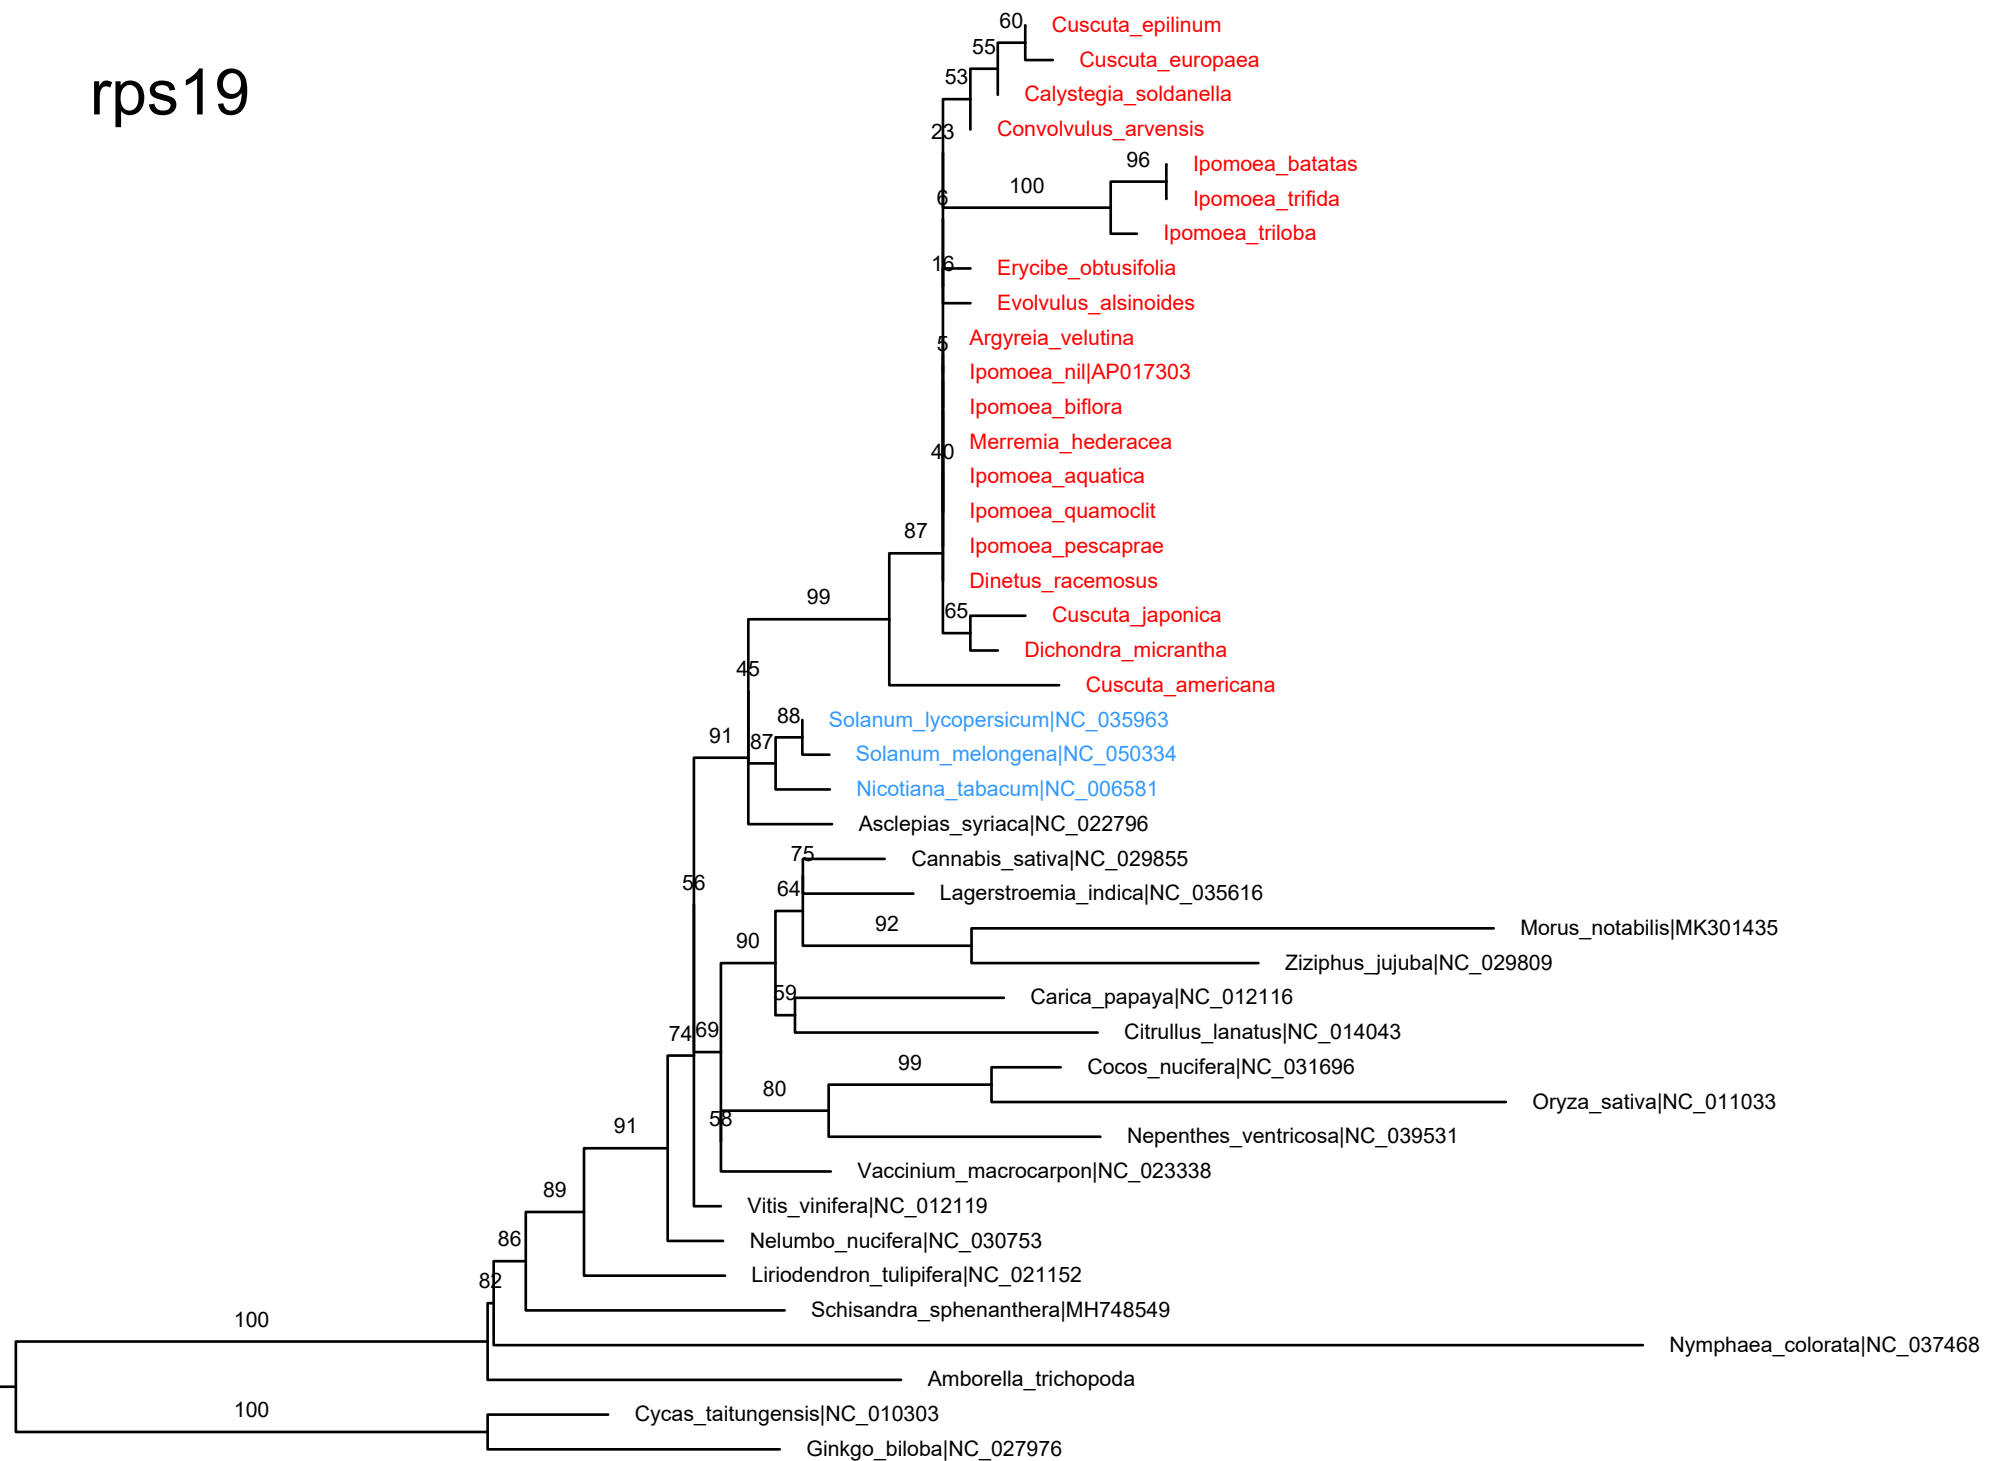

0.03

sdh4

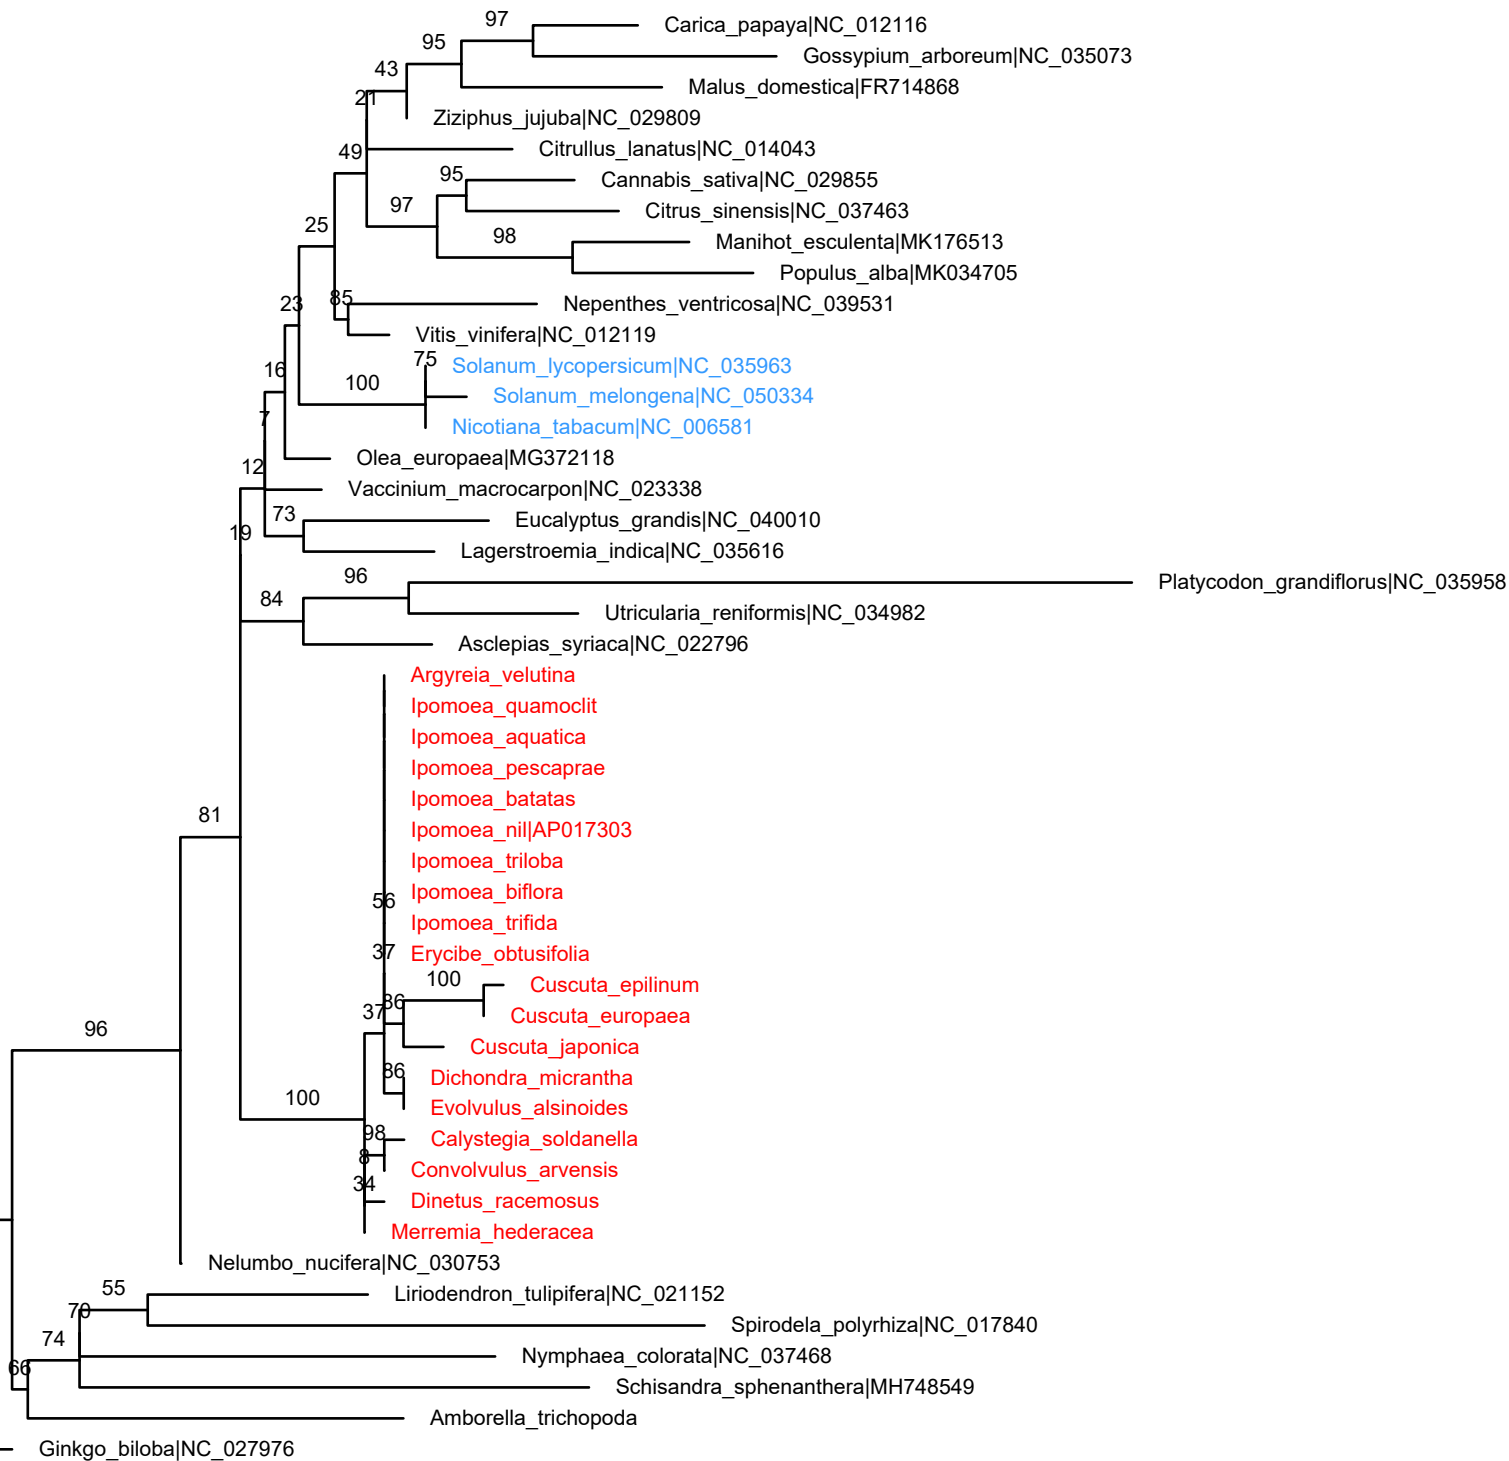

0.02
