# Supplementary material for: Unprecedented organelle genomic variations in morning glories reveal independent evolutionary scenarios of parasitic plants and the diversification of plant mitochondrial complexes
Source: PubMed Central journal article supplement (PMC8851834; doi:10.1186/s12915-022-01250-1), 2022-02-16

### Plastid CDS

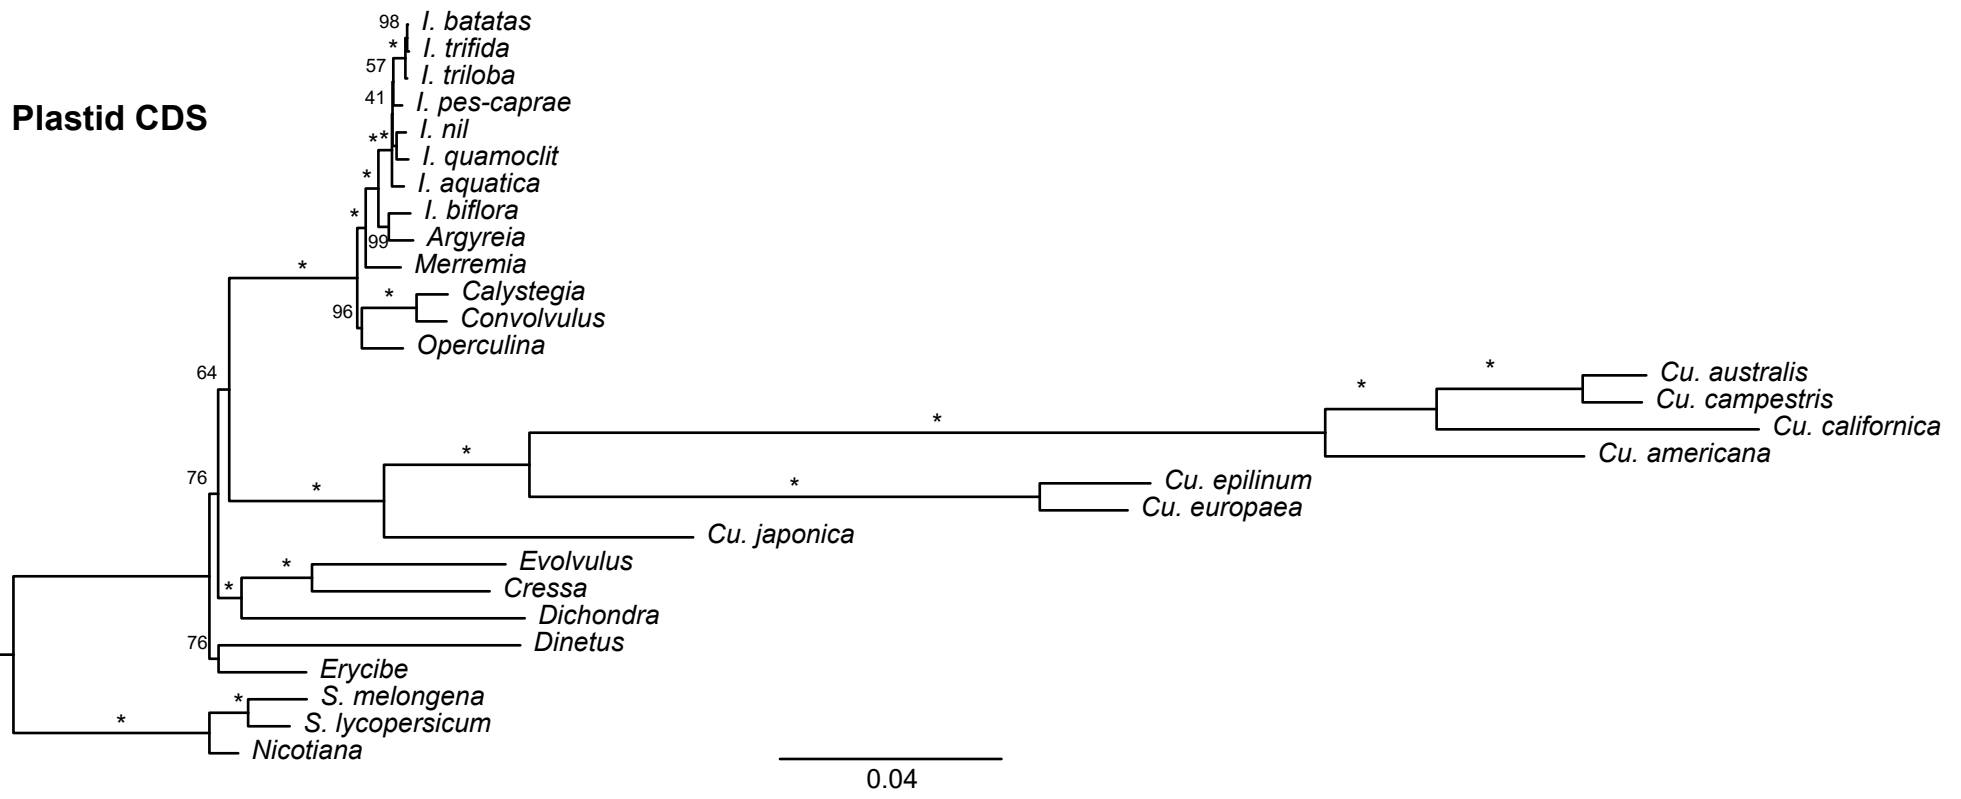

### Mitochondrial CDS

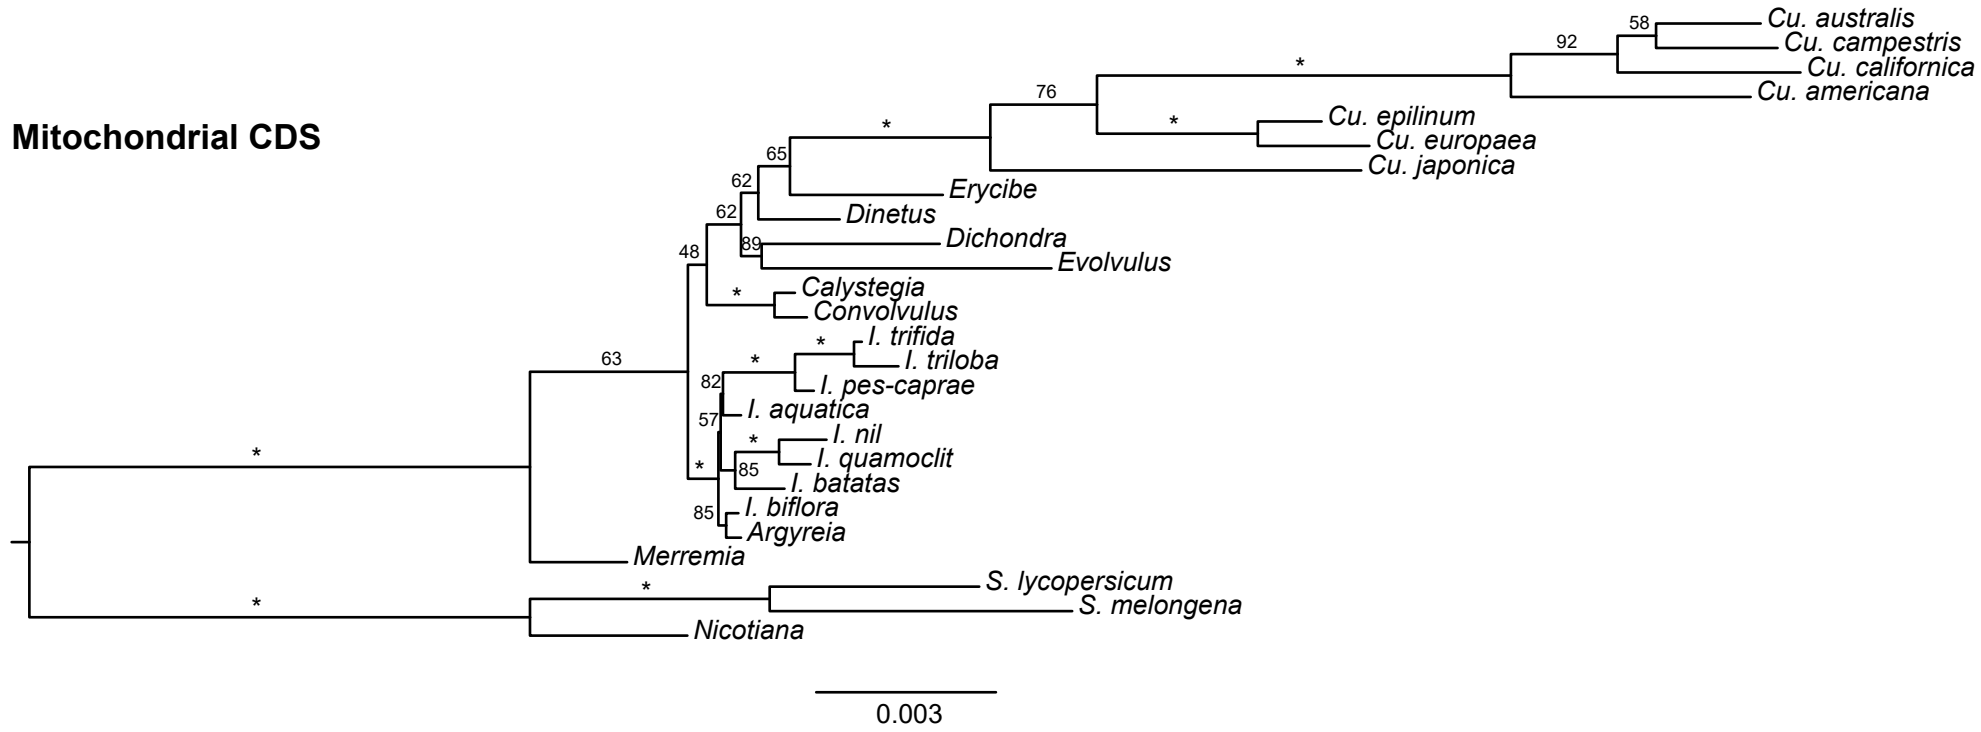

### Nuclear 45S

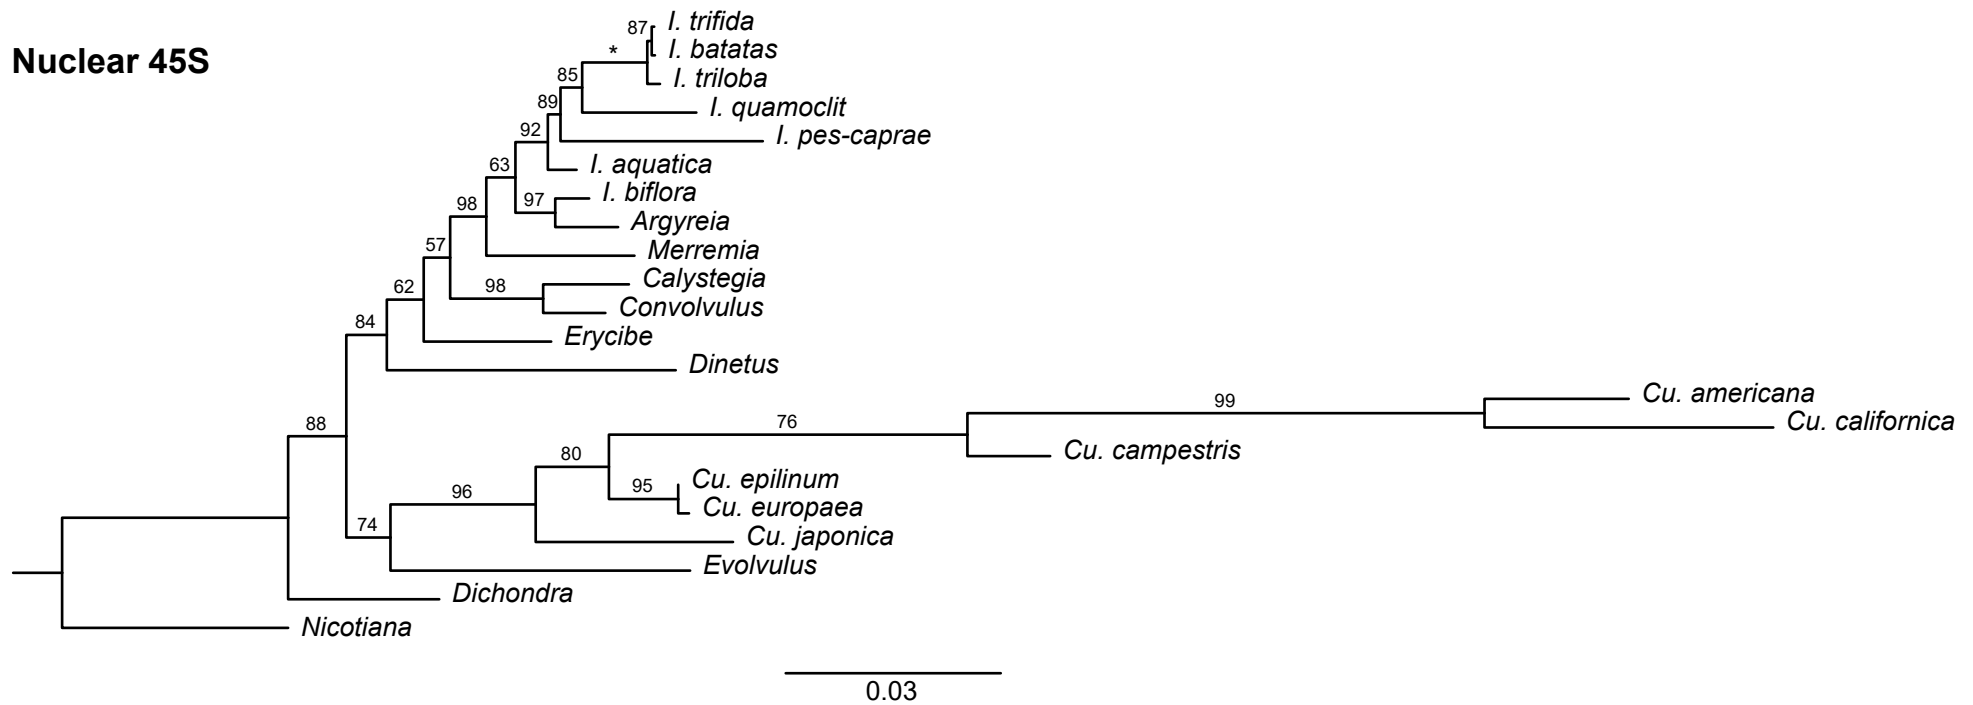

Supplement: 12915_2022_1250_MOESM5_ESM.pdf [file 12915_2022_1250_MOESM5_ESM.pdf]
